# Supplementary material for: Use of social media platforms by migrant and ethnic minority populations during the COVID-19 pandemic: a systematic review
Source: PubMed Central journal article supplement (PMC9676419; doi:10.1136/bmjopen-2022-061896), 2022-11-16
Supplement: bmjopen-2022-061896.draft_revisions.pdf [file bmjopen-2022-061896.draft_revisions.pdf]

# BMJ Open

BMJ Open is committed to open peer review. As part of this commitment we make the peer review history of every article we publish publicly available.

When an article is published we post the peer reviewers' comments and the authors' responses online. We also post the versions of the paper that were used during peer review. These are the versions that the peer review comments apply to.

The versions of the paper that follow are the versions that were submitted during the peer review process. They are not the versions of record or the final published versions. They should not be cited or distributed as the published version of this manuscript.

BMJ Open is an open access journal and the full, final, typeset and author-corrected version of record of the manuscript is available on our site with no access controls, subscription charges or pay-per-view fees (<http://bmjopen.bmj.com>).

If you have any questions on BMJ Open's open peer review process please email [info.bmjopen@bmj.com](mailto:info.bmjopen@bmj.com)

# BMJ Open

## The use of social media platforms by migrant and ethnic minority populations during the COVID-19 pandemic: a systematic review

|                               |                                                                                                                                                                                                                                                                                                                                                                                                                                                                                                                                                                                                                                                                                                                                                                                                                                                                                                                                                                                                                                                                                                                                                                                                                                                                                                                                                                                                                                                                                                                                                                                                                                                                                                                                                               |
|-------------------------------|---------------------------------------------------------------------------------------------------------------------------------------------------------------------------------------------------------------------------------------------------------------------------------------------------------------------------------------------------------------------------------------------------------------------------------------------------------------------------------------------------------------------------------------------------------------------------------------------------------------------------------------------------------------------------------------------------------------------------------------------------------------------------------------------------------------------------------------------------------------------------------------------------------------------------------------------------------------------------------------------------------------------------------------------------------------------------------------------------------------------------------------------------------------------------------------------------------------------------------------------------------------------------------------------------------------------------------------------------------------------------------------------------------------------------------------------------------------------------------------------------------------------------------------------------------------------------------------------------------------------------------------------------------------------------------------------------------------------------------------------------------------|
| Journal:                      | <i>BMJ Open</i>                                                                                                                                                                                                                                                                                                                                                                                                                                                                                                                                                                                                                                                                                                                                                                                                                                                                                                                                                                                                                                                                                                                                                                                                                                                                                                                                                                                                                                                                                                                                                                                                                                                                                                                                               |
| Manuscript ID                 | bmjopen-2022-061896                                                                                                                                                                                                                                                                                                                                                                                                                                                                                                                                                                                                                                                                                                                                                                                                                                                                                                                                                                                                                                                                                                                                                                                                                                                                                                                                                                                                                                                                                                                                                                                                                                                                                                                                           |
| Article Type:                 | Original research                                                                                                                                                                                                                                                                                                                                                                                                                                                                                                                                                                                                                                                                                                                                                                                                                                                                                                                                                                                                                                                                                                                                                                                                                                                                                                                                                                                                                                                                                                                                                                                                                                                                                                                                             |
| Date Submitted by the Author: | 10-Feb-2022                                                                                                                                                                                                                                                                                                                                                                                                                                                                                                                                                                                                                                                                                                                                                                                                                                                                                                                                                                                                                                                                                                                                                                                                                                                                                                                                                                                                                                                                                                                                                                                                                                                                                                                                                   |
| Complete List of Authors:     | <p>Goldsmith, Lucy; St George's University of London, The Migrant Health Research Group, Institute for Infection and Immunity; St George's University of London, Population Health Research Institute</p> <p>Rowland-Pomp, May; St George's University of London, The Migrant Health Research Group, Institute for Infection and Immunity</p> <p>Hanson, Kristin; Kingston University, Faculty of Health, Social Care and Education</p> <p>Deal, Anna; St George's University of London, The Migrant Health Research Group, Institute for Infection and Immunity; London School of Hygiene and Tropical Medicine Faculty of Public Health and Policy</p> <p>Crawshaw, Alison; St George's University of London, The Migrant Health Research Group, Institute for Infection and Immunity</p> <p>Hayward, Sally; St George's University of London, The Migrant Health Research Group, Institute for Infection and Immunity</p> <p>Knights, Felicity; St George's University of London, The Migrant Health Research Group, Institute for Infection and Immunity; St George's University of London, Population Health Research Institute</p> <p>Carter, Jessica; St George's University of London, The Migrant Health Research Group, Institute for Infection and Immunity</p> <p>Ahmad, Ayesha; St George's University of London, Institute of Medical and Biomedical Education</p> <p>Razai, M; St George's University of London, Population Health Research Institute</p> <p>Vandrevala, Tushna; Kingston University, Centre for Applied Health and Social Care Research, Faculty of Health, Social Care and Education</p> <p>Hargreaves, Sally; St George's University of London, The Migrant Health Research Group, Institute for Infection and Immunity</p> |
| Keywords:                     | Public health < INFECTIOUS DISEASES, COVID-19, World Wide Web technology < BIOTECHNOLOGY & BIOINFORMATICS, Infection control < INFECTIOUS DISEASES, MEDICAL JOURNALISM                                                                                                                                                                                                                                                                                                                                                                                                                                                                                                                                                                                                                                                                                                                                                                                                                                                                                                                                                                                                                                                                                                                                                                                                                                                                                                                                                                                                                                                                                                                                                                                        |
|                               |                                                                                                                                                                                                                                                                                                                                                                                                                                                                                                                                                                                                                                                                                                                                                                                                                                                                                                                                                                                                                                                                                                                                                                                                                                                                                                                                                                                                                                                                                                                                                                                                                                                                                                                                                               |

SCHOLARONE™  
Manuscripts

1  
2  
3  
4  
5  
6  
7  
8  
9  
10  
11  
12  
13  
14  
15  
16  
17  
18  
19  
20  
21  
22  
23  
24  
25  
26  
27  
28  
29  
30  
31  
32  
33  
34  
35  
36  
37  
38  
39  
40  
41  
42  
43  
44  
45  
46  
47  
48  
49  
50  
51  
52  
53  
54  
55  
56  
57  
58  
59  
60

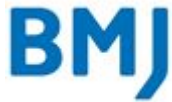

I, the Submitting Author has the right to grant and does grant on behalf of all authors of the Work (as defined in the below author licence), an exclusive licence and/or a non-exclusive licence for contributions from authors who are: i) UK Crown employees; ii) where BMJ has agreed a CC-BY licence shall apply, and/or iii) in accordance with the terms applicable for US Federal Government officers or employees acting as part of their official duties; on a worldwide, perpetual, irrevocable, royalty-free basis to BMJ Publishing Group Ltd ("BMJ") its licensees and where the relevant Journal is co-owned by BMJ to the co-owners of the Journal, to publish the Work in this journal and any other BMJ products and to exploit all rights, as set out in our [licence](#).

The Submitting Author accepts and understands that any supply made under these terms is made by BMJ to the Submitting Author unless you are acting as an employee on behalf of your employer or a postgraduate student of an affiliated institution which is paying any applicable article publishing charge ("APC") for Open Access articles. Where the Submitting Author wishes to make the Work available on an Open Access basis (and intends to pay the relevant APC), the terms of reuse of such Open Access shall be governed by a Creative Commons licence – details of these licences and which [Creative Commons](#) licence will apply to this Work are set out in our licence referred to above.

Other than as permitted in any relevant BMJ Author's Self Archiving Policies, I confirm this Work has not been accepted for publication elsewhere, is not being considered for publication elsewhere and does not duplicate material already published. I confirm all authors consent to publication of this Work and authorise the granting of this licence.

1  
2  
3  
4  
5  
6  
7 **The use of social media platforms by migrant and ethnic minority populations**  
8 **during the COVID-19 pandemic: a systematic review**  
9  
10  
11  
12  
13

14 Lucy P Goldsmith<sup>1,2+</sup>

15 May Rowland-Pomp<sup>1+</sup>

16 Kristin Hanson<sup>3+</sup>

17 Anna Deal<sup>1, 4</sup>

18 Alison F Crawshaw<sup>1</sup>

19 Sally E. Hayward<sup>1,4</sup>

20 Felicity Knights<sup>1,2</sup>

21 Jessica Carter<sup>1</sup>

22 Ayesha Ahmad<sup>5</sup>

23 Mohammad Razai<sup>2</sup>,

24 Tushna Vandrevala<sup>3</sup>

25 Sally Hargreaves<sup>1\*</sup>

26  
27  
28  
29  
30  
31  
32  
33  
34  
35  
36  
37 <sup>1</sup>The Migrant Health Research Group, Institute for Infection and Immunity, St George's,  
38 University of London

39  
40 <sup>2</sup>Population Health Research Institute, St George's, University of London

41  
42 <sup>3</sup> Faculty of Health, Social Care and Education, Kingston University & St George's,  
43 University of London

44  
45 <sup>4</sup> Faculty of Public Health and Policy, London School of Hygiene and Tropical Medicine

46  
47 <sup>5</sup> Institute of Medical and Biomedical Education, St George's, University of London  
48  
49

50  
51 <sup>+</sup>Joint first authors

52  
53 <sup>\*</sup>Corresponding author: Dr Sally Hargreaves; The Migrant Health Research Group, Institute for  
54 Infection and Immunity, St George's, University of London

55  
56 [s.hargreaves@sgul.ac.uk](mailto:s.hargreaves@sgul.ac.uk)  
57  
58  
59  
60

## Abstract

**Objective** To determine the extent and nature of social media use in migrant and ethnic minority communities for COVID-19 information, and implications for preventative health measures including vaccination intent and uptake.

**Design** A systematic review of published and grey literature following the Preferred Reporting Items for Systematic Review and Meta-Analyses (PRISMA) guidelines

**Eligibility Criteria for study selection** Global research reporting the use of social media by migrants and/or ethnic minority groups in relation to COVID-19.

**Data extraction** We extracted data on key outcomes, study design, country, population under study, and sample size.

**Results** 1849 unique records were screened, and 21 data sources included in our analysis involving migrant and ethnic minority populations in the UK, US, China, Jordan, Qatar, and Turkey. We found evidence of consistent use of a range of social media platforms for COVID-19 information in some migrant and ethnic minority populations (including WeChat, Facebook, WhatsApp, Instagram, Twitter, YouTube), which may stem from difficulty in accessing COVID-19 information in their native languages or from trusted sources. There were positive and negative associations with social media use reported, with some evidence suggesting circulating misinformation and social media use may be associated with lower participation in preventative health measures, including vaccine intent and uptake, findings which are likely relevant to multiple population groups.

**Conclusions** Social media platforms are an important source of information about COVID-19 for some migrant and ethnic minority populations. Urgent actions and further research are now needed to better understand the use of social media platforms for accessing health information by different population groups – particularly groups who are marginalised from health systems – effective approaches to tackling circulating misinformation, and to seize on opportunities to

1  
2  
3 better use social media platforms to support public health communication and improve vaccine  
4 uptake.  
5

6 **Registration** This study has been registered with PROSPERO;(CRD42021259190).  
7  
8  
9

## 10 **Article Summary**

- 15 • This international review examines available evidence about the use of social media  
16 platforms by migrant and ethnic minority communities for information about COVID-19,  
17 alongside exploring circulating misinformation via these platforms and implications for  
18 health behaviours including vaccine intent and uptake.  
19
- 20 • Comprehensive systematic review methods were used, following Preferred Reporting  
21 Items for Systematic Reviews and Meta-Analyses (PRISMA) guidelines, and we searched  
22 published and grey literature.  
23
- 24 • This review is the first attempt to synthesise global studies exploring the use and impact  
25 of social media on migrant and ethnic minority populations during the COVID-19  
26 pandemic. However, it is limited by the availability and quality of the datasets available.  
27
- 28 • We acknowledge the limited geographical scope of included studies, with 16 of 21  
29 studies focused on migrant and ethnic minority populations residing in the UK and US  
30 and no data at all from low-income countries. There is a stark lack of data on social  
31 media use from low and middle-income countries, which merits greater consideration  
32 as COVID-19 vaccination gathers pace in these contexts.  
33  
34  
35  
36  
37  
38  
39  
40  
41  
42  
43  
44  
45

## 46 **Introduction**

47  
48  
49 The pandemic has been accompanied by an infodemic, defined as an excess of information  
50 during a disease outbreak – including false or misleading information in digital and physical  
51 environments<sup>1</sup> – that makes it difficult to distinguish reliable information from misinformation  
52 including disinformation (deliberate misinformation) and conspiracy theories. The World Health  
53  
54  
55  
56  
57  
58  
59  
60

Organization (WHO) highlights that in all communities, infodemics cause ‘confusion and risk-taking behaviours that can harm health...it leads to mistrust in health authorities and undermines the public health response, and can intensify or lengthen outbreaks’<sup>1</sup>. The rapid expansion of internet and social media use, in particular, in recent years (including platforms such as Twitter, WhatsApp, and YouTube; Table 1) has meant that both useful and potentially harmful health information can spread rapidly. A large proportion of the most popular COVID-19 videos on YouTube, for example, have been found to contain misinformation, or no factual information, reaching millions of people worldwide<sup>2 3</sup>. YouTube is considered a major platform for information concerning the control of COVID-19, but most COVID-19 videos were of ‘undesirable quality’ containing few government/public health recommendations according to a recent study<sup>4</sup>. A review of YouTube videos on general vaccination found 65% expressed anti-vaccination sentiment<sup>5</sup>, with anti-vaccine posts more likely to be recirculated on Twitter<sup>2</sup>. The spread of misinformation and disinformation has been highlighted as a major risk to ending the COVID-19 pandemic – including undermining trust in vaccines<sup>6</sup> – with researchers highlighting links between misinformation on social media and public doubts around vaccine safety, self-reported compliance with public health guidelines, and intent to vaccinate<sup>7 8</sup>.

**Table 1: Popular social media platforms**  
**Statistics from Statista (2021) <sup>9</sup>**

| Platform  | Primary Feature                                                                                                                                                                     | Country of origin | Organisation | Users                            |
|-----------|-------------------------------------------------------------------------------------------------------------------------------------------------------------------------------------|-------------------|--------------|----------------------------------|
| YouTube   | Online video sharing and social media platform. Free to use.                                                                                                                        | US                | Google       | Approximately >2 billion monthly |
| WhatsApp  | Messaging platform, allows users to send text messages and voice messages, make voice and video calls, and share images, documents, user locations, and other content. Free to use. | US                | Meta         | Approximately >2 billion monthly |
| Instagram | Photo and video sharing social networking site. Free to use.                                                                                                                        | US                | Meta         | Approximately 1 billion monthly  |



|                                      |                                                                                                                                     |       |                          |                              |
|--------------------------------------|-------------------------------------------------------------------------------------------------------------------------------------|-------|--------------------------|------------------------------|
| Facebook                             | Social networking service, allows messaging, image and video sharing, marketplace online shopping, live video sharing. Free to use. | US    | Meta                     | 2.89 billion active monthly  |
| WeChat                               | Instant messaging, social media, mobile payment. Free to use.                                                                       | China | Tencent Holdings Limited | 1.25 billion monthly         |
| TikTok<br>(Known in China as Douyin) | Video sharing focused on short form videos (15 seconds – 3 minutes). Free to use.                                                   | China | ByteDance                | 837 million monthly active   |
| Snapchat                             | Photo sharing multimedia app with video features. Free to use.                                                                      | US    | Snap Inc.                | 347.3 million monthly active |
| Twitter                              | Microblogging focused on short messages known as 'tweets'. Live chat event function Tweetchat.                                      | US    | Twitter Inc.             | 330 million monthly active   |

Although social media platforms are commonly used in the general population, and patterns of use are complex across different population groups<sup>8 10</sup>, some migrant and ethnic minority groups – who may experience barriers to accessing health information and health systems – may be more reliant on social media and the internet as a source of health information. These communities may also draw on diaspora media as a source of health information<sup>11</sup>. The COVID-19 pandemic has disproportionately impacted and exacerbated inequalities faced by migrants and ethnically diverse communities<sup>12 13 11 14 15</sup>, with lower take-up of preventative health measures, such as vaccines, noted in some groups due to a range of personal, societal, and physical barriers<sup>13 15 16</sup>. Some migrant and ethnic minority communities may be more exposed to social media misinformation because of access barriers to accurate information (eg, from official government sources)<sup>17 18</sup>, due to restricted eligibility and access to services, language barriers, and low health literacy. However, little is known about the extent and nature of social media use in these populations, nor the impact that social media use has had on preventative health measures during the pandemic, including COVID-19 vaccine uptake. In addition, there is an opportunity now to explore the extent to which social media platforms could be better used

1  
2  
3 to support information sharing and promote public health messaging in marginalised  
4 communities during the pandemic and beyond.  
5  
6  
7

8  
9 We therefore did a systematic review to explore and assess the extent and nature of social  
10 media use by migrant and ethnic minority groups to access COVID-19 health information, the  
11 extent to which misinformation on social media may have influenced views about COVID-19  
12 preventative measures including vaccination intention and uptake, and to explore good  
13 practice.  
14  
15  
16  
17  
18

## 19 **Methods**

### 20 **Search Strategy**

21  
22  
23 The review was registered with PROSPERO (CRD42021259190)<sup>19</sup> and followed PRISMA  
24 guidelines<sup>20</sup>. The study protocol is in the PROSPERO registration. A Boolean search strategy was  
25 developed containing terms relating to migrants, ethnic minorities, COVID-19, social media, and  
26 misinformation (see Supplementary file 1). We searched the following databases: Embase, Web  
27 of Science, Oxford Academic Journals, PubMed NIH, Clinical Trials, China CDC MMWR, CDC  
28 reports, ProQuest Central (Proquest), CINAHL, Africa Wide Information (Ebsco), Scopus,  
29 PsycInfo, CAB Abstracts, Global Health, J Stage, Science Direct, Wiley Online Journals, JAMA  
30 Network, British Medical Journal, Mary Ann Liebert, New England Journal of Medicine, Sage  
31 Publications, Taylor and Francis Online, Springer Link, Biomed Central, MDPI, ASM, PLOS, The  
32 Lancet, Cell Press, and pre-print sites chemRxiv, SSRNbioRxiv, and medRxiv facilitated through  
33 the WHO Global Research on COVID-19 database from inception to 9/6/2021 (  
34 <https://search.bvsalud.org/global-literature-on-novel-coronavirus-2019-ncov/>). The WHO's  
35 COVID-19 Database<sup>21</sup>, is a daily updated multilingual resource of all literature (peer-reviewed  
36 literature, pre-prints and grey literature) pertaining to COVID-19.  
37  
38  
39  
40  
41  
42  
43  
44  
45  
46  
47  
48  
49  
50  
51  
52

53 Records were imported to Rayyan QCRI<sup>22</sup>. Both title and abstract screening and full text  
54 screening were conducted independently by two reviewers (MR-P and LG) using Rayyan QCRI<sup>22</sup>.  
55  
56  
57  
58  
59  
60

1  
2  
3 Additional relevant papers and grey literature (e.g. from third-sector organisation websites)  
4 were identified using hand searching including backwards and forwards citation tracking.  
5  
6  
7

## 8 9 Selection criteria and primary outcomes

10  
11 Papers reporting the use of social media platforms and implications for preventative health  
12 measures and vaccination intent of migrants and/or ethnic minority groups to COVID-19  
13 globally were eligible. All types of scientific articles, reports and commentaries, editorials,  
14 correspondence letters were eligible for inclusion. Social media platforms were defined as any  
15 medium whereby content (including images, videos, and messages) is circulated to the general  
16 public and may include YouTube, Facebook, Twitter, TikTok, and Snapchat. 'Migrants' were  
17 defined as foreign-born, residing outside of their country of birth. An ethnic minority group was  
18 defined as a group of people with a shared culture, tradition, language, history, living in a  
19 country where most people are from a different ethnic group, and will include  
20 migrants/foreign-born populations alongside individuals born in the host country. Where  
21 studies reported a general population sample, results about migrant/ethnic minority groups  
22 within that sample were eligible for inclusion. No papers were excluded based on language or  
23 geographical origin. Studies were excluded if it was not possible to determine whether  
24 individual(s) in the population studied were migrants or from an ethnic minority group.  
25  
26  
27  
28  
29  
30  
31  
32  
33  
34  
35  
36  
37  
38

## 39 Data Extraction, critical appraisal, and synthesis

40  
41 Data extraction was completed independently by two researchers (MRP and LG) using a piloted,  
42 structured data extraction sheet in Microsoft Excel and data were collated and assessed using  
43 narrative synthesis. Outcomes were extracted as reported. Risk of bias was assessed  
44 independently by two researchers (LG, MRP) using the Quality assessment for Survey Studies in  
45 Psychology for Surveys (Q-SSP)<sup>23</sup> for quantitative studies. The twenty items on this scale can be  
46 rated as "yes", or "no", "not stated clearly", or "not applicable". Scores are calculated by  
47 dividing the "yes" answers by the total number of applicable items, with scores over 70%  
48 indicating "acceptable" quality. The Critical Appraisal Skills programme (CASP) checklist was  
49 used for qualitative studies<sup>24</sup>. The ten items can be rated 'yes', 'can't tell' or 'no'. We rated the  
50  
51  
52  
53  
54  
55  
56  
57  
58  
59  
60

1  
2  
3 CASP by dividing the “yes” answers by the total number of applicable items, with a score of  
4 over 60% indicating “acceptable” quality. We did not exclude any papers on the basis of quality.  
5  
6  
7

## 8 Patient and public involvement

9 Patients and/or the public were not involved in the design, conduct, reporting or dissemination  
10 plans of this research.  
11  
12  
13

## 14 Results

### 15 Overview of data sources

16 Following de-duplication, 1849 unique data sources were identified and screened and  
17 ultimately 129 were full-text screened. 21 data sources were included in the final analysis  
18 (Figure 1). Six studies were conducted in the UK<sup>25-30</sup>, two were jointly conducted in the UK and  
19 US<sup>31 32</sup>. An additional eight studies were conducted in the US,<sup>33-40</sup> and one each in China,<sup>41</sup>  
20 Jordan,<sup>42</sup> Qatar,<sup>43</sup> and Turkey.<sup>44</sup> Eight studies reported on migrants,<sup>28 30 33 41-45</sup> including  
21 migrants in the host countries of China<sup>41</sup>, Jordan<sup>42</sup>, Qatar,<sup>43</sup> Turkey<sup>44</sup>, and the US<sup>33</sup> and UK<sup>28 30</sup>,  
22 and one study involved predominantly migrants from Venezuela residing in other countries.<sup>45</sup>  
23 Nine studies reported about a specific ethnic minority or group (Latino individuals,<sup>33 35 37 38</sup> Black  
24 American citizens,<sup>36 40</sup>, Jain community members<sup>29</sup> and Syrian migrants<sup>42 44</sup>). Seven studies  
25 reported about ethnic minority groups generally<sup>25-27 31 32 34 39</sup>. A survey design was the most  
26 common design, used in half of included studies.  
27  
28  
29  
30  
31  
32  
33  
34  
35  
36  
37  
38  
39  
40  
41  
42  
43

44 Characteristics of included studies are presented in Table 2, including the risk of bias  
45 assessment scores. Quality scores ranged from 76% to 90% for included papers, suggesting  
46 acceptable quality of all included data sources where quality assessment was applicable. Figure  
47 2 shows the geographical location of data sources, highlighting the absence of published and  
48 unpublished data on this topic from most regions of the world.  
49  
50  
51  
52  
53  
54  
55  
56  
57  
58  
59  
60

**Table 2: Characteristics of included studies**

| Included study                                                             | Location of study                            | Study design                                                                    | Population under study                                                | Sample size              | Quality rating*  |
|----------------------------------------------------------------------------|----------------------------------------------|---------------------------------------------------------------------------------|-----------------------------------------------------------------------|--------------------------|------------------|
| <b>Alabdulla 2021<sup>43</sup></b>                                         | Qatar                                        | Survey                                                                          | Non-Qatari residents                                                  | 7821                     | 76% <sup>1</sup> |
| <b>Allington 2021(a)<sup>27</sup></b>                                      | UK                                           | Survey                                                                          | Non-White ethnic groups                                               | 4343                     | 82% <sup>1</sup> |
| <b>Allington 2021(b)<sup>32</sup></b>                                      | UK                                           | Survey                                                                          | Non-White ethnic groups                                               | 8988                     | 89% <sup>1</sup> |
| <b>Behbahani 2020<sup>33</sup></b>                                         | US                                           | Organisational case study                                                       | Latino migrants                                                       | N/K                      | N/A <sup>1</sup> |
| <b>Campos-Castillo 2020<sup>34</sup></b>                                   | US                                           | Survey                                                                          | Non-White ethnic groups                                               | 10,510                   | 88% <sup>1</sup> |
| <b>Cervantes 2021<sup>35</sup></b>                                         | US                                           | Qualitative interviews with thematic analysis                                   | Low-income Latino individuals                                         | 60                       | 90% <sup>3</sup> |
| <b>Chandler 2020<sup>36</sup></b>                                          | US                                           | Qualitative interviews with thematic analysis                                   | Black women (18-31yrs)                                                | 15                       | 90% <sup>3</sup> |
| <b>Crawshaw 2021<sup>28</sup></b>                                          | UK                                           | Evidence synthesis linked to outputs from participatory workshops with migrants | International migrants                                                | N/K                      | N/A <sup>2</sup> |
| <b>Despres 2020<sup>37</sup></b>                                           | US                                           | Organisational case study                                                       | Latino community living in America                                    | N/K                      | N/A <sup>2</sup> |
| <b>Danish Refugee Council (DRC) 2020<sup>44</sup></b>                      | Turkey                                       | Survey                                                                          | Syrian refugees in South-East Turkey                                  | 774                      | 82% <sup>1</sup> |
| <b>Hamadneh 2021<sup>42</sup></b>                                          | Jordan                                       | Survey                                                                          | Syrian refugee mothers                                                | 389                      | 78% <sup>1</sup> |
| <b>Lockyer 2021<sup>25</sup></b>                                           | UK                                           | Qualitative interview; reflective thematic analysis                             | People from different ethnic groups in Bradford                       | 20                       | 90% <sup>3</sup> |
| <b>Loomba 2021<sup>31</sup></b>                                            | UK & USA                                     | Randomised controlled experiment                                                | Other ethnic groups than White                                        | 4,000 (UK)<br>4,001 (US) | N/A <sup>2</sup> |
| <b>Moyce 2020<sup>38</sup></b>                                             | US                                           | Qual interviews narrative synthesis                                             | Latino individuals                                                    | 14                       | 90% <sup>3</sup> |
| <b>Paul 2021<sup>26</sup></b>                                              | UK                                           | Repeated measures survey; cohort study                                          | Other ethnic groups than White                                        | 32,361                   | 89% <sup>1</sup> |
| <b>Regional Inter-agency coordination platform (R4V) 2021<sup>45</sup></b> | Any host country for migrants from Venezuela | Survey                                                                          | Predominantly migrants from Venezuela                                 | 334                      | 90% <sup>3</sup> |
| <b>Vekemans 2021<sup>29</sup></b>                                          | UK                                           | Organisational case study                                                       | Jain community members                                                | 25,000 estimate          | N/A <sup>2</sup> |
| <b>Viswanath 2021<sup>39</sup></b>                                         | US                                           | Survey                                                                          | Non-White ethnic groups                                               | 1012                     | 78% <sup>1</sup> |
| <b>Wang 2020<sup>41</sup></b>                                              | China                                        | Survey                                                                          | International migrants                                                | 1,426                    | 78% <sup>1</sup> |
| <b>Woko 2021<sup>40</sup></b>                                              | US                                           | Survey                                                                          | Black American citizens                                               | 1,074                    | 77% <sup>1</sup> |
| <b>Deal 2021<sup>30</sup></b>                                              | UK                                           | Qualitative in-depth interview study                                            | Precarious migrants (asylum seekers, undocumented migrants, refugees) | 32                       | 90% <sup>3</sup> |

\*Scores were calculated on both scales by dividing the “yes” answers by the total number of applicable items.

<sup>1</sup>Quality assessment for Survey Studies in Psychology for Surveys (Q-SSP) Checklist for surveys

<sup>2</sup>N/A = not applicable due to research item design.

<sup>3</sup>Critical Appraisal Skills programme (CASP) checklist

## Use of social media platforms as a source of information about COVID-19

For some migrants and ethnic minority groups, consistent use of social media platforms for sharing and receiving COVID-19-related health information was reported in several included studies<sup>30 35-37 41-43 45 44</sup>. Social media was reported to be the preferred source of information about COVID-19 for international migrants in China (WeChat was used by 94.5% of respondents for COVID-19 information).<sup>41</sup> Among 389 Syrian refugee mothers in Jordan<sup>42</sup>, Facebook and WhatsApp were the main sources of information for 87% and 69% of respondents respectively for COVID-19 information; with 21% indicating that they accessed information from professional databases or government websites, and 53% via television (this survey was circulated via Facebook and WhatsApp). Migrants from Venezuela (residing in numerous countries) reported Facebook and WhatsApp were their two primary sources of information about COVID-19 in a survey of 334 migrants<sup>45</sup>. A survey of 774 refugee households in Southeast Turkey<sup>44</sup> found the majority (75%) obtained COVID-19 information from Facebook, YouTube, Twitter and the internet in general, 15% via SMS/WhatsApp messages, followed by radio/TV (64%) and members of their community/family (34%); only 10% reported getting information from NGO/UN sources. This study concluded that the heavy reliance on social media for information may expose a sizeable proportion of refugee households to fake or inaccurate information. In a US study of Black women aged 18-31 years, 58% of respondents reported using social media (Instagram and Facebook) to obtain COVID-19 information<sup>36</sup>. Participants from the US Latino community described relying on social media for information about the pandemic<sup>35</sup>. In Qatar, migrants reported they preferred to find out about COVID-19 using their own personal research or searching for information, including using social media as a source<sup>43</sup>. A study of precarious migrants (asylum seekers, undocumented migrants) in the UK found many relied on social media (WhatsApp groups, Facebook) for information on the pandemic and the ongoing vaccination programme<sup>30</sup>.

1  
2  
3 A key theme emerging in one UK study of ethnic minority groups<sup>25</sup> was that the “avalanche” of  
4 information surrounding COVID-19 had led to interviewees feeling overwhelmed and confused:  
5 participants reported using a variety of sources of information, including TV, radio, news  
6 stations in Pakistan, India, Slovakia, and Poland, online newspapers, Facebook, WhatsApp,  
7 Twitter, Google, and medical journals. A number of these participants said they dismissed some  
8 stories encountered on WhatsApp and Facebook; however, the sheer volume of messages  
9 coupled with the fact that people they trusted were sharing them, proved difficult to ignore,  
10 with participants raising concerns about how quickly social media stories were shared. One  
11 study exploring the views of US Latinos reported that they consulted national and local news  
12 reports for information about COVID-19 and many reported that they got their news from  
13 Spanish-language news due to difficulty in understanding news in English; some received their  
14 news from social media sources, including Facebook, but expressed caution around messages  
15 from social media as there was no way to ensure the accuracy of the reports.<sup>38</sup>  
16  
17  
18  
19  
20  
21  
22  
23  
24  
25  
26  
27  
28

29 According to one study, member of ethnic minority groups were also more likely to post COVID-  
30 19 content on social media than White individuals<sup>34</sup>, with respondents who identified as Black  
31 (odds ratio [OR] 1.29, 95% CI 1.02-1.64; P=.03), Latino (OR 1.66, 95% CI 1.36-2.04; P<.001), or  
32 other races/ethnicities (OR 1.33, 95% CI 1.02-1.72; P=.03) had higher odds than respondents  
33 who identified as White of reporting posting COVID-19 content on social media.  
34  
35  
36  
37  
38  
39  
40

### 41 Drivers of social media reliance

42 Studies reported that some migrant and ethnic minority groups turned to social media due as a  
43 result of a need for connection and to acquire accessible information from people they  
44 considered to be reliable sources. For the Latino community in the US, faith and community  
45 bonds were valued ways of coping with the difficulties of the pandemic which included feelings  
46 of social isolation, stress, and uncertainty and – according to one study – social media  
47 facilitated these connections in a virtual space<sup>38</sup>. The Jain community in London used social  
48 media to communicate news and knowledge about COVID-19 and stay connected online, with  
49  
50  
51  
52  
53  
54  
55  
56  
57  
58  
59  
60

1  
2  
3 events moving to a virtual space; individuals reportedly benefited from and were grateful for  
4 this community use of social media<sup>29</sup>.  
5  
6  
7

8  
9 Several studies highlight concerns that some migrant and ethnic minority groups were unable  
10 to find official information in their host country in their native language about various aspects  
11 of COVID-19, hence their reliance on social media<sup>25 28 30 41 44</sup>. For example, a UK study of  
12 precarious migrants (asylum seekers, undocumented migrants) reported that those feeling  
13 most abandoned or scared due to a lack of understandable, clear official information in the  
14 early stages of the pandemic were more likely to rely on word-of-mouth or social media  
15 (WhatsApp groups, Facebook) for information, including around the vaccination programme<sup>30</sup>.  
16 One study of international migrants in China (94.5% of whom preferred social media for news  
17 about COVID-19) had lower rates of correct knowledge about COVID-19 compared to rates  
18 reported for Chinese residents<sup>41</sup>. The authors speculate that this might be due to a lack of  
19 available public health information in a range of languages.  
20  
21  
22  
23  
24  
25  
26  
27  
28  
29

30  
31 Other studies showed positive associations with use of social media and access to information.  
32 One study highlighted that social media can support migrants to navigate the complex  
33 medicolegal context of their host countries by accessing information about public health  
34 measures and how to access medical help<sup>33</sup>. Social media use was associated with improved  
35 knowledge about COVID-19 and how to stay safe, in studies of Syrian refugee mothers<sup>42</sup> and US  
36 Latinos<sup>37</sup>. In another study specifically curated, culturally relevant digital content was  
37 considered to be an effective health promotion tool to share knowledge about practical actions  
38 to be taken to address the inequitable impact of the pandemic on US Latinos<sup>37</sup>.  
39  
40  
41  
42  
43  
44  
45  
46  
47  
48

## 49 Misinformation and social media use

50  
51 A summary of some of the key misinformation narratives identified in studies are provided in  
52 Table 3. Some studies made links between social media and circulating misinformation in  
53 migrant and ethnic minority groups. For example, a UK cohort study found that both belonging  
54  
55  
56  
57  
58  
59  
60



to an ethnic minority group and socioeconomic disadvantage was associated with both exposure to misinformation about vaccines, and mistrust in information about COVID-19<sup>26</sup>. A study of Syrian refugee mothers in Jordan, who reported receiving most of their COVID-19 information through social media, identified some erroneous beliefs about pregnancy, COVID-19 and breast milk<sup>42</sup>. A UK study among ethnic minority groups reported that participants encountered a range of misinformation, usually through social media sources and that vaccine hesitancy could be attributed to safety concerns, negative stories and personal knowledge, all of which had been amplified by recent exposure to misinformation via social media<sup>25</sup>. Myths identified included the idea that health professionals at the local hospital were injecting people with COVID-19 or killing people with the COVID-19 vaccine; there were wider beliefs reported about vaccines containing a microchip; making people infertile, or that vaccines are being tested on ethnic minority individuals<sup>25</sup>. These participants described the dilemma of not knowing what to trust or who to listen to, including the videos /posts that appeared to be from trusted professionals; therefore, they could not entirely dismiss negative stories circulating via social media and elsewhere.

**Table 3: Examples of circulating misinformation on social media platforms relating to COVID-19 (2020), reproduced and compiled from Loomba et al<sup>31</sup> and Lockyer et al.<sup>25</sup>**

| Misinformation identified                                                                                                                                                                                                                                                                                                                                                                                                                                                                                                                                                                                                    | Source  | Engagement <sup>1</sup> | Reach <sup>2</sup> |
|------------------------------------------------------------------------------------------------------------------------------------------------------------------------------------------------------------------------------------------------------------------------------------------------------------------------------------------------------------------------------------------------------------------------------------------------------------------------------------------------------------------------------------------------------------------------------------------------------------------------------|---------|-------------------------|--------------------|
| "Scientists have expressed doubts over the effectiveness of a COVID-19 vaccine that has been rushed to human trials, after all the monkeys used in initial testing later contracted COVID-19."                                                                                                                                                                                                                                                                                                                                                                                                                               | Twitter | 1.59K                   | 1.5m               |
| "The new vaccine for COVID-19 will be the first of its kind EVER. It will be an mRNA vaccine which will literally alter your DNA. It will wrap itself into your system. You will essentially become a genetically modified human being"                                                                                                                                                                                                                                                                                                                                                                                      | Twitter | 27                      | 19.6K              |
| "They said it was just to flatten the curve. Now it's a battle for human survival." The only must-see action thriller for 2020. Starring: Bill Gates, Anthony Fauci, Chris Witty, Matt Hancock. Guest mask appearances: Clintons, Boris Johnson, Nicola Sturgeon, Joe Biden & Tedros. [Graphic featuring Mr. Bill Gates with the following quote.] "If we do a really good job with vaccines, we can reduce population by up to 15%. But if we create a worldwide pandemic first, killing people and making many of the survivors sterile, then create the vaccine, we may achieve the Georgia Guidestones 1st commandment!" | Twitter | 11                      | 1.49K              |
| Something is very fishy about all this indeed. "A VIRUS WITH A 99.6% SURVIVAL RATE FOR PEOPLE UNDER 70 BUT THE ENTIRE WORLD NEEDS TO TAKE A VACCINE? I'M NO SHERLOCK HOLMES BUT SOMETHING'S FISHY ABOUT ALL THAT....."                                                                                                                                                                                                                                                                                                                                                                                                       | Twitter | N/K <sup>2</sup>        | 32.5K              |
| "Big Pharma whistle-blower: '97% of corona vaccine recipients will become infertile'"                                                                                                                                                                                                                                                                                                                                                                                                                                                                                                                                        | Twitter | 6.95K                   | 336K               |

|                                                                                                                      |                                                                                                                                                                                                                                                                                                                                                                                                                                                                                                                                                                                                                                                                                                                                                                                                                                                                                                                                                                                                                                                                                                                                                                                                                                                                                                                                                                                         |                                |       |       |
|----------------------------------------------------------------------------------------------------------------------|-----------------------------------------------------------------------------------------------------------------------------------------------------------------------------------------------------------------------------------------------------------------------------------------------------------------------------------------------------------------------------------------------------------------------------------------------------------------------------------------------------------------------------------------------------------------------------------------------------------------------------------------------------------------------------------------------------------------------------------------------------------------------------------------------------------------------------------------------------------------------------------------------------------------------------------------------------------------------------------------------------------------------------------------------------------------------------------------------------------------------------------------------------------------------------------------------------------------------------------------------------------------------------------------------------------------------------------------------------------------------------------------|--------------------------------|-------|-------|
| 1<br>2<br>3<br>4<br>5<br>6<br>7<br>8<br>9<br>10<br>11<br>12<br>13<br>14                                              | "I've been in Twitter jail for the last 12 hours for posting a link to a peer reviewed scientific study published in Vaccine showing that in military personnel prior receipt of the flu shot increased COVID-19 risk by 36%. Censorship is vile & unAmerican."                                                                                                                                                                                                                                                                                                                                                                                                                                                                                                                                                                                                                                                                                                                                                                                                                                                                                                                                                                                                                                                                                                                         | Twitter                        | 25.1K | 1.41K |
| 15<br>16<br>17<br>18<br>19<br>20<br>21<br>22<br>23<br>24<br>25<br>26<br>27<br>28<br>29<br>30<br>31<br>32<br>33<br>34 | "So we know for a fact that the flu vaccine worsens COVID-19 symptoms. So what are they mandating now? The flu vaccine, of course."<br><br>"PREPARING THE PROPAGANDA BLITZ. Yale University and the U.S. government are running clinical trials to develop propaganda messaging to persuade Americans to take experimental, genetically engineered, unlicensed, "Warp Speed," zero liability, expedited vaccines with limited short duration safety testing. Researchers compared reactions in 12 focus groups using "guilt, embarrassment, bravery, anger, trust" and "fear" to overcome vaccines hesitancy"                                                                                                                                                                                                                                                                                                                                                                                                                                                                                                                                                                                                                                                                                                                                                                           | Facebook                       | NK    | NK    |
|                                                                                                                      | <ul style="list-style-type: none"> <li>➤ COVID-19 is not real, it is an effort to control society</li> <li>➤ COVID-19 has been manufactured by China or other governments for control purposes</li> <li>➤ COVID-19 is caused by 5G</li> <li>➤ COVID-19 has been invented to make people use contactless payments so that the government can track individuals</li> <li>➤ COVID-19 testing gives so many false positives that it is ineffective and you should not self-isolate</li> <li>➤ COVID-19 exists but is not as virulent as the government says it is</li> <li>➤ If children test positive for COVID-19 during school hours, they can be taken away into care and will not be able to see their parents until they test negative</li> <li>➤ The COVID-19 vaccine contains a chip that will track individuals, stop them travelling etc</li> <li>➤ The COVID-19 vaccine will make people infertile and is an attempt to reduce the population, particularly targeted at people from BAME communities</li> <li>➤ BAME people are being used as 'guinea pigs' to test out the COVID-19 vaccine</li> <li>➤ The COVID-19 vaccine has been developed and approved too quickly and has not been fully tested</li> <li>➤ The COVID-19 vaccine will negatively disrupt your natural immune system</li> <li>➤ Herbal remedies will be more effective than the COVID-19 vaccine</li> </ul> | Multiple platforms/<br>unknown | NK    | NK    |

1 Engagement measures the number of likes and retweets.

2 Reach measures the number of followers and thus potential audience size.

NK=Not known.

In a study of 60 Latinx adults hospitalised for COVID-19 in the US, many participants reported that they relied on social media for COVID-19 recommendations and described a lack of information and circulating misinformation, with suspicion of the government and immigration departments was a common misinformation theme: "some of us see [COVID] as a tactic for the government to access our documentation status and deport us"<sup>35</sup>. One Mexican male (age 45) in one US study<sup>38</sup> noted: "When someone uploads something to Facebook then no-one believes in it 100%"; a Mexican female (age 33) was also quoted as saying "[I get my information] well through the news, TV, Facebook and all of that...not everything I see is credible".

1  
2  
3 In a UK qualitative study<sup>25</sup>, participants who initially disregarded conspiratorial beliefs found it  
4 challenging to maintain their confidence that the rumours were untrue due to a number of  
5 factors: (i) receiving many social media messages about them; (ii) receiving messages about  
6 them from trusted others; (iii) feeling anxious; and (iv) being under lockdown conditions at  
7 home. Participants expressed confusion about which story to trust, and ongoing difficulty  
8 identifying information as misinformation and dismissing it. Similarly, another study<sup>36</sup> reported  
9 that 79% of female Black Americans interviewed stated that they were confused by the COVID-  
10 19 information they'd accessed from any source: "Sometimes I feel unsure about the  
11 information that I'm receiving because it's a lot of different things about it. Everybody's not  
12 saying the same thing. So, I'm kind of unsure about what to believe".<sup>36</sup>  
13  
14  
15  
16  
17  
18  
19  
20  
21  
22  
23

## 24 Social media impact on preventative health measures and vaccine intent

25 A small number of studies linked social media use with lower participation in preventative  
26 measures among migrants and ethnic minority groups. A UK/US survey study found vaccine  
27 hesitancy to be associated with informational reliance on social media and membership of an  
28 ethnic minority group<sup>27</sup>. A UK qualitative study reported that ethnic minority groups were  
29 influenced by anti-vaccine misinformation, including from social media.<sup>25</sup> A UK qualitative  
30 study of precarious migrants found that among 23 participants who were hesitant about  
31 receiving a vaccine some participants described fears around theories based on misinformation,  
32 often originating from social media or word of mouth, with many describing feeling conflicted  
33 about which information sources to trust<sup>30</sup>. Community leaders from African, Caribbean, Asian  
34 and Eastern Mediterranean migrant groups in London, UK reported substantial COVID-19  
35 vaccine hesitancy due to misinformation circulating on social media and word of mouth  
36 combined with a lack of accurate, translated and clear guidance<sup>28</sup>. Similarly, in a US qualitative  
37 study of Latino adults, some participants reported encountering a lack of knowledge  
38 accompanied by misinformation on social media causing them to dismiss preventative  
39 measures<sup>35</sup>. Another US study among Latino people reported that social media acted as a  
40 potential deterrent for following some public health measures to prevent infection by allowing  
41 people to observe the negative, guideline-breaking behaviours of others in social media posts<sup>38</sup>.  
42  
43  
44  
45  
46  
47  
48  
49  
50  
51  
52  
53  
54  
55  
56  
57  
58  
59  
60

1  
2  
3  
4  
5 On the other hand, a large (8,001 participants) US/UK randomised controlled experiment<sup>31</sup>  
6 found no significant differences in the response of different ethnic groups to misinformation in  
7 relation to vaccine intent. A large US/UK study<sup>32</sup> found membership of an ethnic minority group  
8 was associated with reduced vaccine intention, a relationship which was significant in three out  
9 of four studies ( $p < 0.001$ ,  $n = 3890$ ;  $p = 0.017$ ,  $n = 1663$ ;  $p < 0.001$ ,  $n = 2237$ ). The relationship  
10 persisted even when use of legacy (print and broadcast media) and frequency of use of social  
11 media was controlled for. High levels of social media use was not associated with vaccine intent  
12 in any of the three studies exploring this relationship; however, high information reliance on  
13 social media was significantly associated with negative vaccine intent ( $p = 0.028$ ,  $n = 2237$ ),  
14 suggesting a reliance on social media for information can make users vulnerable to  
15 misinformation. This study did not include interaction terms between ethnicity and information  
16 reliance on social media, which could have indicated whether the effect of information reliance  
17 on social media on vaccine intent differs by ethnicity.  
18  
19  
20  
21  
22  
23  
24  
25  
26  
27  
28  
29  
30

### 31 Good practice in promoting information and countering misinformation

32 Evidence suggests the important role of strong connections with the local community to  
33 identify and counter misinformation and rumours by trusted and valued sources of information.  
34 Most studies recommended improving the accessibility of public health information for migrant  
35 and ethnic minority communities.<sup>26 28 33 35 36 38-41 45</sup> For example, providing public health  
36 information in the media channel preferred by that group<sup>35</sup>, in multiple languages<sup>25</sup>, and using  
37 local, trusted voices delivering specific and targeted messages to counter fake news<sup>25 35</sup>. A  
38 strong interest in online, personalised information was identified<sup>37 38</sup>. Where social media was  
39 used to share personalised and culturally tailored public health information, it has a positive  
40 influence with good health knowledge, health seeking behaviours and vaccine intent<sup>25-28 33 35-37</sup>  
41 <sup>39-42 45</sup>. Studies indicated the need for culturally tailored health messaging to ensure equitable  
42 health knowledge for improving vaccine intent and health seeking behaviours<sup>28 35-37</sup>.  
43  
44  
45  
46  
47  
48  
49  
50  
51  
52  
53  
54  
55  
56  
57  
58  
59  
60

1  
2  
3 More personalised means of health information communication was highlighted as a demand  
4 for informational reliance. A national US organisation which provides online health information  
5 tailored to the US Latino community found a high level of interest in their COVID-19 curated  
6 content, suggesting a strong demand for tailored and culturally relevant material<sup>37</sup>. In a new  
7 approach, 'virtual patient navigators', helpers working online, typically using messages to  
8 provide individually tailored health information, were made available to Latino migrants  
9 through a New York-based communication platform<sup>33</sup>.

10  
11  
12 Working through trusted sources was also emphasised. Providing accurate and tailored  
13 information about COVID-19 via trusted community members and organizations was suggested  
14 in a study of Black women aged 19-31 years in the US<sup>36</sup>. The study recommended that health  
15 professionals take an active role collaborating with the community to address inequities that  
16 Black women are experiencing in the pandemic<sup>36</sup>. Participants in a randomised controlled study  
17 to explore the impact of misinformation on vaccine intent on different populations groups  
18 reported finding videos on social media very engaging, especially when delivered in multiple  
19 languages by someone in a trusted profession (e.g., doctor/teacher/nurse)<sup>31</sup>.

20  
21  
22 Successful countering myths was reported in a UK study wherein the local council rapidly  
23 responded to fake news circulating in the local population (e.g., a rumour about children who  
24 test positive in school for COVID-19 being removed from the school and/or their parents until  
25 they test clear)<sup>25</sup>. Videos to refute the myth were swiftly posted online in both Urdu and  
26 Punjabi, and these were reported to be effective by members of the local population<sup>25</sup>.  
27 Additional studies report successfully countering misinformation using a network of patient  
28 navigators<sup>33</sup> and community household surveys<sup>25</sup>. Social media use to communicate with family  
29 was also reported to be effective in challenging COVID-19 denial misinformation rumours  
30 through reporting of lived experience of COVID-19<sup>35</sup>.

## Discussion

Among migrant and ethnic minority populations in the UK, US, China, Jordan, Qatar, and Turkey we found evidence of consistent use of social media for COVID-19 information, including via WeChat, Facebook, WhatsApp, Instagram, Twitter, YouTube, which may stem from a difficulty in accessing COVID-19 information in their native languages or from sources they trusted. There were both positive and negative associations with social media use reported, with some evidence of circulating misinformation and social media use associated with lower participation in preventative health measures, especially vaccination intent, and finding that will be undoubtedly generalisable to multiple population groups. This is a rapidly evolving field of research, and data are limited, but our work highlights the considerable importance of social media platforms as a source of information and misinformation about COVID-19 for some migrant and ethnic minority populations during the pandemic. Whilst we know social media is used by many people, and misinformation has been circulating widely in the general population, it may be the case that those excluded from national public health responses and/or who faced specific barriers to accurate public health information and support may have been disproportionately impacted. Urgent actions and further research are now needed to better understand use of social media platforms for health information in different population groups, find effective approaches to tackling misinformation, and to seize on opportunities to make better use of social media platforms to support public health communication and improve vaccine uptake globally. Furthermore, the findings highlight the crucial role of locally trusted sources in identifying and tackling misinformation, and underscores the benefits of disseminating personalised and culturally relevant health messages, including via social media.

This review is the first attempt to synthesise global studies exploring the use and impact of social media on migrant and ethnic minority populations during the COVID-19 pandemic. However, it is limited by the availability and quality of the datasets available. We acknowledge the limited geographical scope of included studies, with 16 of 21 studies focused on migrant and ethnic minority populations residing in the UK and US and no data at all from low-income

1  
2  
3 countries. We acknowledge that definitions and terms pertaining to migrants and ethnic  
4 minorities and social media are used inconsistently in research; this is an ongoing challenge  
5 within the field, which has previously been evidenced in similar reviews, and may mean we  
6 have missed papers. This was mitigated against by searching the published and grey literature  
7 more widely. In addition, we acknowledge that migrants and ethnic minorities are a highly  
8 diverse group with a range of health and socioeconomic situations making it hard to generalise;  
9 however there is evidence in several contexts that these populations may have been  
10 disproportionately impacted by the COVID-19 pandemic<sup>14 16 46</sup>.

11  
12  
13  
14  
15  
16  
17  
18  
19  
20 The findings of our review have been confirmed by more recent studies. For example, a survey  
21 of migrants in Greece found their main source of information about the vaccine was via social  
22 media platforms and the internet in general, and that vaccine hesitancy was linked to a lack of  
23 adequate information and driven by fear, anxiety, exposure to negative news and  
24 misinformation<sup>47 48</sup>. In Turkey, a 2021 survey and feedback mechanism in refugee communities  
25 found information gaps, misconceptions, and rumours about COVID-19 vaccines circulating  
26 mainly by word of mouth and on social media, undermining health information<sup>49</sup>. In a recent  
27 study of Venezuelan migrants in Latin America, 70% said they had access to a mobile phone,  
28 with the main communication channels being WhatsApp and Facebook, yet half said they felt  
29 uninformed<sup>50</sup>. We also found that some migrants and ethnic minorities used diaspora media as  
30 a source of COVID-19 related information during the pandemic, which merits further  
31 consideration in terms of understanding how to better engage these groups in preventative  
32 health care and vaccination, and has been previously reported in studies as influencing views  
33 and beliefs around vaccination<sup>51</sup>. Misinformation on social media correlated negatively with  
34 vaccine intention and our findings align with other research in this area and will undoubtedly be  
35 relevant to many other population groups<sup>2 7 30</sup>. A recent study among migrants and nationals in  
36 Qatar acknowledged 'personal research' via social media as important to them for seeking  
37 information about COVID-19 vaccines, underlining the key role social media has in influencing  
38 people's attitudes towards vaccine uptake<sup>52</sup>.



1  
2  
3 The European Centre for Disease Prevention and Control (ECDC) and other public health bodies  
4 have raised concerns around barriers to public health information among migrant populations  
5 and ethnic minority groups residing in Europe and other high-income countries during the  
6 pandemic<sup>14 15</sup>. Public health guidance in some countries was not initially tailored to the needs of  
7 migrant and ethnic minority groups<sup>18 53-55</sup>. A review of the availability of government produced  
8 risk communications across Council of Europe member states in June 2021 found only 48%  
9 (23/47) of countries translated COVID-19 information into at least one migrant language, with  
10 information on testing or healthcare entitlements in common migrant languages only found in  
11 6% (3/47), suggesting individuals not able to access information in the host country language  
12 may have been excluded to some extent from governments' public health messaging<sup>18</sup>. In  
13 Denmark, a series of qualitative interviews with migrants found that they felt uncertain  
14 regarding government guidance for COVID-19; although written material was translated into 19  
15 languages, it was not effectively disseminated<sup>56</sup>. In Montreal, Canada, there were delays to  
16 publishing official multilingual fact sheets on COVID-19 guidelines, and information phone lines  
17 only operate in French and English; those who had arrived most recently, had lower language  
18 (French/English) ability or lower literacy had more difficulty accessing local COVID-19  
19 information<sup>57</sup>. Lack of English or French language at the time of immigration to Canada were  
20 associated with lower rates of testing and higher percent positivity for COVID-19 in recently  
21 arrived adult immigrants and refugees<sup>58</sup>. A study among refugees and migrants in deprived  
22 areas in Greece found that migrants may have difficulties understanding public health  
23 messaging due to cultural and language barriers.<sup>18 54 59</sup> Merely translating public health  
24 information is not likely to be sufficient; information needs to be tailored and targeted so it is  
25 conveyed in ways that resonate with the target population. A range of key resources and  
26 guidelines on risk communication and engagement strategies for COVID-19 public health  
27 responses, including vaccination, among marginalised populations globally are available, as well  
28 as a social media toolkit for healthcare practitioners  
29 (<https://www.who.int/publications/m/item/a-social-media-toolkit-for-healthcare-practitioners--desktop>)<sup>60-62</sup>. However, it will be vitally important that the lessons learned around



1  
2  
3 communication of public health information to marginalised groups during the pandemic are  
4 meaningfully carried forward.  
5  
6  
7

8  
9 Where social media is used to share personalised and culturally tailored public health  
10 information, it has a positive correlation with good health knowledge, health seeking  
11 behaviours and vaccine intent<sup>37 42</sup> Our research shows the need for culturally tailored health  
12 messaging to ensure equitable health knowledge and to improve vaccine uptake, by accurate  
13 public health messaging through trusted sources of information<sup>28 35-37</sup>. We make a number of  
14 recommendations for policy and practice (Table 4), which include the need for systematic  
15 monitoring of information and attitudes circulating on social media<sup>63</sup>, as well as timely rebuttal  
16 of misinformation from trusted professionals. Several resources are now available to support  
17 addressing misinformation about COVID-19 vaccines as well as fostering demand for  
18 vaccines.<sup>64-66</sup>  
19  
20  
21  
22  
23  
24  
25  
26  
27  
28

29 There is a stark lack of data on social media use from low and middle-income countries, which  
30 merits greater consideration as COVID-19 vaccination gathers pace in these contexts. In  
31 addition, more evidence is needed to examine the role social media platforms play in positively  
32 or negatively influencing health behaviours such as vaccine intent and uptake for COVID-19 in  
33 all populations (including other excluded groups eg, homeless, internally displaced  
34 people/IDPs). Social media is an important source of health information for some migrant and  
35 ethnic minority communities and tackling misinformation needs to be done using this medium  
36 given the lack of trust in government messaging in some of these communities<sup>67</sup>. Our findings  
37 are consistent with those of others working in this field, which show that social media can have  
38 a crucial role in disseminating health information, tackling infodemics and misinformation<sup>4</sup>.  
39 There is an opportunity now to more effectively use social media to make vaccine intent  
40 desirable, appealing and normative among migrants and ethnic minority groups. There is an  
41 urgent need to address infodemic-related challenges in a rapidly changing information  
42 environment, including real-time monitoring of social media messages and misinformation and  
43 the development of online tools to fight disinformation, with a focus on collecting stratified  
44  
45  
46  
47  
48  
49  
50  
51  
52  
53  
54  
55  
56  
57  
58  
59  
60

1  
2  
3 population data to enable targeted and tailored responses. Robust interventions relying on  
4 behavioural science to tackle misinformation using social media and evaluations are a plausible  
5 next step to address immunisation challenges for COVID-19 vaccines but also routine vaccines.  
6  
7 Building trust in public health messaging, identifying information gaps, finding innovative ways of  
8 disseminating health information, and detecting and responding to misinformation as it  
9 emerges remain a priority for public health<sup>67 68</sup>.  
10  
11  
12  
13  
14  
15  
16  
17

#### 18 **Table 4: Key messages and recommendations**

- |                                                                                                                                                                                                                                                                                                                                                                                                                                                                                                                                                                                                                                                                                                                                                                                                                                                                                                                                                                                                                                                                                                                                                                                                                                                                                                                                                                                                                                                                                                                                                                                                                                                                                                                                                                                                                                                                                            |
|--------------------------------------------------------------------------------------------------------------------------------------------------------------------------------------------------------------------------------------------------------------------------------------------------------------------------------------------------------------------------------------------------------------------------------------------------------------------------------------------------------------------------------------------------------------------------------------------------------------------------------------------------------------------------------------------------------------------------------------------------------------------------------------------------------------------------------------------------------------------------------------------------------------------------------------------------------------------------------------------------------------------------------------------------------------------------------------------------------------------------------------------------------------------------------------------------------------------------------------------------------------------------------------------------------------------------------------------------------------------------------------------------------------------------------------------------------------------------------------------------------------------------------------------------------------------------------------------------------------------------------------------------------------------------------------------------------------------------------------------------------------------------------------------------------------------------------------------------------------------------------------------|
| <ul style="list-style-type: none"><li>21 • Social media is an important source of health information for some migrant and ethnic minority communities, who may face barriers to accurate public health information, health, and vaccinations systems. More evidence is urgently needed to examine the role social media platforms play in positively or negatively influencing health behaviours such as vaccine intent and uptake for COVID-19 in marginalised populations.</li><li>22</li><li>23</li><li>24</li><li>25</li><li>26</li><li>27</li><li>28</li><li>29</li><li>30 • There is a stark lack of data on social media use from low and middle-income countries which merits greater consideration as COVID-19 vaccination gathers pace in these contexts.</li><li>31</li><li>32</li><li>33</li><li>34</li><li>35 • More emphasis must be placed on exploring opportunities for sharing and transmitting accurate information via social media platforms, for example, to make vaccine intent desirable, appealing and normative.</li><li>36</li><li>37</li><li>38</li><li>39</li><li>40 • Use of diaspora media by migrant populations, as a source of COVID-19 related information during the pandemic and for other health information, merits further research and greater consideration when designing and delivering public health interventions.</li><li>41</li><li>42</li><li>43</li><li>44</li><li>45</li><li>46</li><li>47 • Proactively monitor social media platforms and other media sources to identify anti-vaccine sentiment, misinformation, fake news, and rumours, and address them in real-time.</li><li>48</li><li>49</li><li>50</li><li>51</li><li>52 • There is a need to promote targeted and tailored health information to marginalised populations who face access barriers to health and vaccination systems, through</li><li>53</li><li>54</li></ul> |
|--------------------------------------------------------------------------------------------------------------------------------------------------------------------------------------------------------------------------------------------------------------------------------------------------------------------------------------------------------------------------------------------------------------------------------------------------------------------------------------------------------------------------------------------------------------------------------------------------------------------------------------------------------------------------------------------------------------------------------------------------------------------------------------------------------------------------------------------------------------------------------------------------------------------------------------------------------------------------------------------------------------------------------------------------------------------------------------------------------------------------------------------------------------------------------------------------------------------------------------------------------------------------------------------------------------------------------------------------------------------------------------------------------------------------------------------------------------------------------------------------------------------------------------------------------------------------------------------------------------------------------------------------------------------------------------------------------------------------------------------------------------------------------------------------------------------------------------------------------------------------------------------|

1  
2  
3 preferred and trusted sources and channels of information including social media  
4 platforms, and to ensure investment in workforce and infrastructure to support this.  
5  
6

- 7 • Engage with and involve communities in developing culturally specific messages and  
8 approaches, and support community-driven initiatives to identify at-risk groups, map  
9 local influencers, and define content for locally meaningful communication  
10 campaigns. Facilitate partnership working at the local level through involvement of  
11 diverse stakeholders and ensure community partners are recognised and reimbursed  
12 for their contributions and expertise.  
13  
14
- 15 • Social media platforms should exercise more accountability and sign pledges to  
16 systematically track and remove harmful content that undermine public health  
17 measures, particularly during a public health crisis. The public must be empowered to  
18 identify and flag misinformation on social media  
19  
20
- 21 • Public health bodies and healthcare professionals should avoid a narrow focus on  
22 misinformation and a one-way communication of 'more accurate' information. They  
23 should seek to understand the underlying causes of exposure to and belief in  
24 misinformation including genuine knowledge void, access barriers and health literacy.  
25  
26
- 27 • Lessons must be learned around shortfalls in the communication of public health  
28 information to marginalised groups during this pandemic. Importantly, countries  
29 should gather and evaluate innovations and models of best practice in this area,  
30 which must be meaningfully carried forward to strengthen uptake of routine  
31 vaccinations and other public health interventions.  
32  
33  
34  
35  
36

### 37 38 39 40 **Conflicts of Interests**

41 All authors report nothing to declare.  
42  
43  
44

### 45 46 **Data availability statement**

47 All data used in the systematic review are appropriately referenced and available online in the  
48 sources cited.  
49  
50

### 51 52 53 **Ethics statements**

54 Not applicable.  
55  
56  
57  
58  
59

## Patient consent for publication

Not applicable.

## Funding and acknowledgements

This study was funded by the National Institute for Health Research (NIHR300072) and Academy of Medical Sciences (SBF005\1111). LPG, SH, and AFC are funded by the NIHR (NIHR300072); AFC and SH are funded by the Academy of Medical Sciences (SBF005\1111). SH acknowledges funding from the Novo Nordisk Foundation (Mobility– Global Medicine and Health Research) and the World Health Organization. AD and SEH are funded by the Medical Research Council (MRC/N013638/1). KR is funded by the Rosetrees Trust (M775). MR is funded by an NIHR In-Practice Clinical Fellowship (NIHR 302007). JC is funded by an NIHR In-Practice Clinical Fellowship (NIHR300290). The views expressed are those of the author(s) and not necessarily those of the NHS, the NIHR, or the Department of Health and Social Care. The funder of the study had no role in study design, data collection, data analysis, data interpretation, or writing of the report.

## Author Contributions

The study was conceptualised by SH, and the protocol and research question were developed by SH, LPG and MRP. Searches were developed by MRP and LG, with input from SH and SEH. Screening was done by LPG and MRP. Data extraction and analysis was done by LPG and MRP, with input from SH. The first draft of the manuscript was produced by LG, MRP, and SH, and developed with KH and TV, who all contributed to interpretation of the results. All authors commented upon and approved the final manuscript. SH is guarantor of this study.

## Disclaimer

The views expressed are those of the author(s) and not necessarily those of the NHS, the NIHR, or the Department of Health and Social Care. The funder of the study had no role in study design, data collection, data analysis, data interpretation, or writing of the report.

1  
2  
3  
4  
5 **Competing interests** None declared.  
6  
7  
8

9 **References**  
10

- 11 1. WHO. Health topics/Infodemic. Available from: [https://www.who.int/health-topics/infodemic#tab=tab\\_1](https://www.who.int/health-topics/infodemic#tab=tab_1).
- 12 2. N. Puri, et al. Social media and vaccine hesitancy: new updates for the era of COVID-19 and  
13 globalized infectious diseases. *Human Vaccines & Immunotherapeutics*, 16 (11) (2020),  
14 pp. 2586-2593.
- 15 3. H. Oi-Yee Li, et al. YouTube as a source of information on COVID-19: a pandemic of  
16 misinformation? *BMJ Global Health*, 5 (2020).
- 17 4. Tsaie S-F, et al. What social media told us in the time of COVID-19: as scoping reviews. *Lancet*  
18 *Digit Health* 2021; 3:e175-94. .
- 19 5. C.H. Basch, et al. What do popular YouTube videos say about vaccines?  
20 *Child Care Health Dev*, 43 (4) (2017), pp. 499-503.
- 21 6. Larson, Heidi J. "The biggest pandemic risk? Viral misinformation." *Nature*, vol. 562, no. 7726,  
22 Oct. 2018, p. 309. Gale Academic OneFile,  
23 [link.gale.com/apps/doc/A573035610/AONE?u=anon~d201a883&sid=googleScholar&xid=01fdad7a](http://link.gale.com/apps/doc/A573035610/AONE?u=anon~d201a883&sid=googleScholar&xid=01fdad7a). .
- 24 7. Wilson SL, Wiysonge C. Social media and vaccine hesitancy. *BMJ Global Health* 2020; 5 (10)  
25 <https://gh.bmj.com/content/5/10/e004206>.
- 26 8. Roozenbeek J, Schneider CR, Dryhurst S, et al. Susceptibility to misinformation about COVID-  
27 19 around the world. *Royal Society Open Science* 2020;7(10):201199. doi:  
28 10.1098/rsos.201199.
- 29 9. Statista. <https://www.statista.com> 2021 [cited 2021 17th Sept 2021]. Available from:  
30 <https://www.statista.com/topics/1164/social-networks/#dossierKeyfigures> accessed  
31 17th Sept 2021 2021.
- 32 10. American Press Institute. Race, Ethnicity, and the Use of Social Media for News. *How*  
33 *Millennials Use Technology to Get News* 2015.  
34 [https://www.americanpressinstitute.org/publications/reports/survey-research/race-](https://www.americanpressinstitute.org/publications/reports/survey-research/race-ethnicity-social-media-news/)  
35 [ethnicity-social-media-news/](https://www.americanpressinstitute.org/publications/reports/survey-research/race-ethnicity-social-media-news/).
- 36 11. Gorman D, Bielecki K, Willocks L, Pollock K. A qualitative study of vaccination behaviour  
37 amongst female Polish migrants in Edinburgh, Scotland. *Vaccine*. 2019;37(20):2741-7.
- 38 12. World Health Organization. 10 global health issues to track in 2021. *Spotlight*.  
39 <https://www.who.int/news-room/spotlight/10-global-health-issues-to-track-in-2021>.
- 40 13. Cinelli M, Quattrociocchi W, Galeazzi A, et al. The COVID-19 social media infodemic.  
41 *Scientific Reports* 2020;10(1):16598. doi: 10.1038/s41598-020-73510-5
- 42 14. Hayward SE, Deal A, Cheng C, et al. Clinical outcomes and risk factors for COVID-19 among  
43 migrant populations in high-income countries: A systematic review. *Journal of Migration*  
44 *and Health* 2021;3:100041. doi: <https://doi.org/10.1016/j.jmh.2021.100041>  
45  
46  
47  
48  
49  
50  
51  
52  
53  
54  
55  
56  
57  
58  
59  
60

15. ECDC. Reducing COVID-19 transmission and strengthening vaccine uptake among migrant populations in the EU/EEA. Technical Report. ECDC: Stockholm, 2021. .
16. Hargreaves S, Hayward S, Noori T, McKee M, Kumar B. COVID-19: Counting migrants in. *Lancet* 2021; 398. .
17. Turkish Red Crescent Society CCs, Fatma Nur Bakkalbaşı, Onurcan Ceyhan, Tenadi Gölemez. COVID-19 Rumour Tracking Report: Turkish Red Crescent Society (TRCS) in Collaboration with International Federation of Red Cross and Red Crescent Societies (IFRC), 2021.
18. Maldonado BMN, et al. Engaging the vulnerable: a rapid review of public health communication aimed at migrants during the COVID-19 pandemic in Europe *J Migr Health* 2020; 1:100004. <https://pubmed.ncbi.nlm.nih.gov/33447830/>.
19. Rowland-Pomp M, Hargreaves S, Goldsmith LP, et al. The impact of social media and misinformation on migrant and ethnic minorities populations and their response to the COVID-19 pandemic: a systematic review. *PROSPERO* 2021 CRD42021259190, 2021.
20. Page MJ, McKenzie JE, Bossuyt PM, et al. The PRISMA 2020 statement: an updated guideline for reporting systematic reviews. *BMJ* 2021;372:n71. doi: 10.1136/bmj.n71
21. World Health Organization. COVID-19 Global literature on coronavirus disease database <https://www.who.int/emergencies/diseases/novel-coronavirus-2019/global-research-on-novel-coronavirus-2019-ncov>.
22. Ouzzani M, Hammady H, Fedorowicz Z, et al. Rayyan—a web and mobile app for systematic reviews. *Systematic reviews* 2016;5(1):1-10. doi: 10.1186/s13643-016-0384-4
23. Protogerou C, Hagger MS. A checklist to assess the quality of survey studies in psychology. *Methods in Psychology* 2020;3 doi: 10.1016/j.metip.2020.100031
24. Critical Appraisal Skills Programme. CASP Qualitative Checklist. 2018 doi: <https://casp-uk.net/casp-tools-checklists/>
25. Lockyer I, Rahman, Dickerson, Pickett, Sheldon, Wright, McEachan, Sheard. Understanding Covid-19 misinformation and vaccine hesitancy in context: Findings from a qualitative study involving citizens in Bradford, UK, 2020.
26. Paul E, Steptoe A, Fancourt D. Attitudes towards vaccines and intention to vaccinate against COVID-19: Implications for public health communications. *The Lancet Regional Health Europe* 2021;1:100012-12. doi: [10.1016/j.lanep.2020.100012](https://doi.org/10.1016/j.lanep.2020.100012)
27. Allington(a) D, McAndrew S, Moxham-Hall V, et al. Coronavirus conspiracy suspicions, general vaccine attitudes, trust and coronavirus information source as predictors of vaccine hesitancy among UK residents during the COVID-19 pandemic. *Psychol Med* 2021;1-12. doi: [10.1017/S0033291721001434](https://doi.org/10.1017/S0033291721001434)
28. Crawshaw AF, Deal A, Rustage K, et al. What must be done to tackle vaccine hesitancy and barriers to COVID-19 vaccination in migrants? *J Travel Med* 2021;28(4):taab048. doi: 10.1093/jtm/taab048
29. Vekemans T. Crisis and Continuation: The Digital Relocation of Jain Socio-Religious Praxis during the COVID-19 Pandemic. *Religions* 2021;12(5):342-42. doi: [10.3390/rel12050342](https://doi.org/10.3390/rel12050342)
30. Deal A et al. Strategies and action points to ensure equitable uptake of COVID-19 vaccinations: a national qualitative interview study to explore the views of undocumented migrants, asylum seekers, and refugees. *J Migr Health* 2021; 4: 100050. .



- 1
  - 2
  - 3
  - 4
  - 5
  - 6
  - 7
  - 8
  - 9
  - 10
  - 11
  - 12
  - 13
  - 14
  - 15
  - 16
  - 17
  - 18
  - 19
  - 20
  - 21
  - 22
  - 23
  - 24
  - 25
  - 26
  - 27
  - 28
  - 29
  - 30
  - 31
  - 32
  - 33
  - 34
  - 35
  - 36
  - 37
  - 38
  - 39
  - 40
  - 41
  - 42
  - 43
  - 44
  - 45
  - 46
  - 47
  - 48
  - 49
  - 50
  - 51
  - 52
  - 53
  - 54
  - 55
  - 56
  - 57
  - 58
  - 59
  - 60
31. Loomba S, de Figueiredo A, Piatek SJ, et al. Measuring the impact of COVID-19 vaccine misinformation on vaccination intent in the UK and USA. *Nature Human Behaviour* 2021;5(3):337-48. doi: [10.1038/s41562-021-01056-1](https://doi.org/10.1038/s41562-021-01056-1)
32. Allington(b) D, McAndrew S, Moxham-Hall VL, et al. Media usage predicts intention to be vaccinated against SARS-CoV-2 in the US and the UK. *Vaccine* 2021;39(18):2595-603. doi: [10.1016/j.vaccine.2021.02.054](https://doi.org/10.1016/j.vaccine.2021.02.054)
33. Behbahani S, Smith CA, Carvalho M, et al. Vulnerable Immigrant Populations in the New York Metropolitan Area and COVID-19: Lessons Learned in the Epicenter of the Crisis. *Acad Med* 2020;95(12):1827-30. doi: [10.1097/ACM.00000000000003518](https://doi.org/10.1097/ACM.00000000000003518)
34. Campos-Castillo C, Laestadius LI. Racial and Ethnic Digital Divides in Posting COVID-19 Content on Social Media Among US Adults: Secondary Survey Analysis. *J Med Internet Res* 2020;22(7):e20472-e72. doi: [10.2196/20472](https://doi.org/10.2196/20472)
35. Cervantes L, Martin M, Frank MG, et al. Experiences of Latinx Individuals Hospitalized for COVID-19: A Qualitative Study. *JAMA Netw Open* 2021;4(3):e210684-e84. doi: [10.1001/jamanetworkopen.2021.0684](https://doi.org/10.1001/jamanetworkopen.2021.0684)
36. Chandler R, Guillaume D, Parker AG, et al. The impact of COVID-19 among Black women: evaluating perspectives and sources of information. *Ethn Health* 2020:1-14. doi: [10.1080/13557858.2020.1841120](https://doi.org/10.1080/13557858.2020.1841120)
37. Despres C, Aguilar R, McAlister A, et al. Communication for Awareness and Action on Inequitable Impacts of COVID-19 on Latinos. *Health Promot Pract* 2020;21(6):859-61. doi: [10.1177/1524839920950278](https://doi.org/10.1177/1524839920950278)
38. Moyce S, Velazquez M, Claudio D, et al. Exploring a rural Latino community's perception of the COVID-19 pandemic. *Ethn Health* 2020:1-13. doi: [10.1080/13557858.2020.1838456](https://doi.org/10.1080/13557858.2020.1838456)
39. Viswanath K, Bekalu M, Dhawan D, et al. Individual and social determinants of COVID-19 vaccine uptake. *BMC Public Health* 2021;21(1):818-18. doi: [10.1186/s12889-021-10862-1](https://doi.org/10.1186/s12889-021-10862-1)
40. Woko C, Siegel L, Hornik R. An Investigation of Low COVID-19 Vaccination Intentions among Black Americans: The Role of Behavioral Beliefs and Trust in COVID-19 Information Sources. *J Health Commun* 2020;25(10):819-26. doi: [10.1080/10810730.2020.1864521](https://doi.org/10.1080/10810730.2020.1864521)
41. Wang C, Tian Q, Zhao P, et al. Disease knowledge and attitudes during the COVID-19 epidemic among international migrants in China: a national cross-sectional study. *Int J Biol Sci* 2020;16(15):2895-905. doi: [10.7150/ijbs.47075](https://doi.org/10.7150/ijbs.47075)
42. Hamadneh S, Hamadneh J, Amarin Z, et al. Knowledge and attitudes regarding Covid-19 among syrian refugee women in Jordan. *Int J Clin Pract* 2021;75(5):e14021-e21. doi: [10.1111/ijcp.14021](https://doi.org/10.1111/ijcp.14021)
43. Alabdulla M, Reagu SM, Al-Khal A, et al. COVID-19 vaccine hesitancy and attitudes in Qatar: A national cross-sectional survey of a migrant-majority population. *Influenza Other Respir Viruses* 2021;15(3):361-70. doi: [10.1111/irv.12847](https://doi.org/10.1111/irv.12847)
44. Danish Refugee Council. COVID-19 Impact on Refugees in South East Turkey. 2020 doi: <https://data2.unhcr.org/en/needs-assessment/1432>
45. (R4V) RI-aCP. Information and communication needs assessment - U-Report Uniendo Voces Regional Poll, 2021.

- 1
  - 2
  - 3
  - 4
  - 5
  - 6
  - 7
  - 8
  - 9
  - 10
  - 11
  - 12
  - 13
  - 14
  - 15
  - 16
  - 17
  - 18
  - 19
  - 20
  - 21
  - 22
  - 23
  - 24
  - 25
  - 26
  - 27
  - 28
  - 29
  - 30
  - 31
  - 32
  - 33
  - 34
  - 35
  - 36
  - 37
  - 38
  - 39
  - 40
  - 41
  - 42
  - 43
  - 44
  - 45
  - 46
  - 47
  - 48
  - 49
  - 50
  - 51
  - 52
  - 53
  - 54
  - 55
  - 56
  - 57
  - 58
  - 59
  - 60
46. Buikema AR, et al. Racial and ethnic disparity in clinical outcomes among patients with confirmed COVID-19 infection in a large US electronic health record database. *Lancet EClinMed* 2021; Sept 101075. .
47. Hellenic Red Cross. CEA. Survey on the migrant's population informatio needs, regarding health issues (COVID-19) <https://communityengagementhub.org/resource/survey-on-the-migrants-population-information-needs-regarding-health-issues-covid-19/>.
48. Hellenic Red Cross. Perceptions survey on Covid-19 vaccination, Greece. <https://communityengagementhub.org/resource/perceptions-survey-on-covid-19-vaccination-greece/>.
49. COVID-19 rumour tracking report. Ankara: Turkish Red Crescent Society; 2021 (<https://communityengagementhub.org/wp-content/uploads/sites/2/2021/10/Rumour-tracking-report-2021.pdf>, accessed 11 January 2022).
50. Only half of refugees and migrants from Venezuela feel informed, survey finds. Panama City: Coordination Platform for Refugees and Migrants from Venezuela; 2020 (<https://www.r4v.info/sites/default/files/2021-06/CWC%20EN.pdf> , accessed 11 January 2022).
51. Ganczak M, Bielecki K, Drozd-Dabrowska M, Topczewska K, Biesiada D, Molas-Biesiada A et al. Vaccination concerns, beliefs and practices among Ukrainian migrants in Poland: a qualitative study. *BMC Public Health*. 2021;21 (1):93. doi: 10.1186/s12889-020-10105-9.
52. Alabdulla M, Reagu SM, Al-Khal A, Elzain M, Jones RM. COVID-19 vaccine hesitancy and attitudes in Qatar: A national cross-sectional survey of a migrant-majority population. *Influenza Other Respir Viruses*. 2021;15(3):361-70.
53. Patel P, Hiam L, Orcutt M, Burns R, Devakumar D, Aldridge R, et al. Policy brief: Including migrants and refugees in the British government's response to COVID-19. 2020.
54. Doctors of the World. An Unsafe Distance: The Impact of the COVID-19 Pandemic on Excluded People in England. 2020.
55. Kondilis E, Papamichail D, McVann, Carruthers E, Veizis A, Orcutt M, Hargreaves S. The impact of the COVID-19 pandemic on refugees and asylum seekers in Greece: a retrospective analysis of national surveillance data, 2020. *Lancet EClinMed* 2021; 37: 100958: <https://doi.org/10.1016/j.eclinm.2021.100958>.
56. Institut for Menneskerettigheder. Corona rammer skævt - etnicitet og smitte. Copenhagen, Denmark; 2020.
57. Cleveland, J , Hanley, J , Jaimes, A , Wolofsky, T. , 2020. Impacts de la crise de la COVID-19 sur les «communautés culturelles »montréalaises: Enquête sur les facteurs socioculturels et structurels affectant les groupes vulnérables. Montréal: Institut universitaire SHERPA .
58. Guttman, A , Gandhi, S , Wanigaratne, S , Lu, H , Ferreira-Legere, L , Paul, J , et al. , 2020. COVID-19 in Immigrants, Refugees and Other Newcomers in Ontario: Characteristics of Those Tested and Those Confirmed Positive, as of June 13, 2020. ICES, Toronto, ON .
59. Cholera, R , Falusi, OO , Linton, JM. , 2020. Sheltering in place in a xenophobic climate: COVID-19 and children in immigrant families. *Pediatrics* 146 (1).
60. Conducting community engagement for COVID-19 vaccines: interim guidance, 31 January 2021. Geneva: World Health Organization; 2021 (<https://apps.who.int/iris/handle/10665/339451>, accessed 11 January 2022).



- 1  
2  
3  
4  
5  
6  
7  
8  
9  
10  
11  
12  
13  
14  
15  
16  
17  
18  
19  
20  
21  
22  
23  
24  
25  
26  
27  
28  
29  
30  
31  
32  
33  
34  
35  
36  
37  
38  
39  
40  
41  
42  
43  
44  
45  
46  
47  
48  
49  
50  
51  
52  
53  
54  
55  
56  
57  
58  
59  
60
61. COVID-19 immunization in refugees and migrants: principles and key considerations: interim guidance, 31 August 2021. Geneva: World Health Organization; 2021 (<https://www.who.int/publications/i/item/covid-19-immunization-in-refugees-and-migrants-principles-and-key-considerations-interim-guidance-31-august-2021>).
  62. Good practice guidance for risk communication and community engagement (RCCE) for refugees, internally displaced persons (IDPs), migrants and host communities particularly vulnerable to COVID-19 pandemic. London: British Red Cross; 2020 (<https://communityengagementhub.org/wp-content/uploads/sites/2/2020/06/Practical-Guidance-RCCE-Refugees-IDPs-Migrants.pdf>).
  63. The Vaccine Confidence Project. Media Monitoring Report UK COVID-19 01 June to 31 July 2021. London: LSHTM <https://www.vaccineconfidence.org/research-feed/social-media-conversations-and-attitudes-in-the-uk-towards-covid-19>.
  64. Vaccine misinformation management field guide: guidance for addressing a global infodemic and fostering demand for immunization. New York: United Nations Children's Fund; 2020 (<https://vaccinemisinformation.guide>).
  65. Understanding the infodemic and misinformation in the fight against COVID-19: digital transformation toolkit. Washington (DC). Pan American Health Organization; 2020 ([https://iris.paho.org/bitstream/handle/10665.2/52052/Factsheet-infodemic\\_eng.pdf?sequence=16](https://iris.paho.org/bitstream/handle/10665.2/52052/Factsheet-infodemic_eng.pdf?sequence=16)).
  66. How to address COVID-19 vaccine misinformation. Atlanta (GA): United States Centers for Disease Control and Prevention; 2021 (<https://www.cdc.gov/vaccines/covid-19/health-departments/addressing-vaccine-misinformation.html>).
  67. Vandrevalla, Hendy, Hanson, Alidu & Ala (2022). Unpacking COVID-19 and Conspiracy Theories in the UK Black Community. Pre-print. .
  68. Vandrevalla T, et al. "It's possibly made us feel a little more alienated": how people from ethnic minority communities conceptualise COVID-19 and its influence on engagement with testing. Jan 3, 2022 <https://doi.org/10.1177%2F135581962111054961>.

1  
2  
3  
4  
5  
6  
7  
8  
9  
10  
11 **Figure 1: PRISMA diagram of included studies**  
12  
13  
14  
15  
16  
17  
18  
19  
20

21 **Figure 2: Regional distribution of included data sources**  
22  
23  
24  
25  
26  
27  
28  
29  
30  
31  
32  
33  
34  
35  
36  
37  
38  
39  
40  
41  
42  
43  
44  
45  
46  
47  
48  
49  
50  
51  
52  
53  
54  
55  
56  
57  
58  
59  
60

1  
2  
3  
4  
5  
6  
7  
8  
9  
10  
11  
12  
13  
14  
15  
16  
17  
18  
19  
20  
21  
22  
23  
24  
25  
26  
27  
28  
29  
30  
31  
32  
33  
34  
35  
36  
37  
38  
39  
40  
41  
42  
43  
44  
45  
46  
47  
48  
49  
50  
51  
52  
53  
54  
55  
56  
57  
58  
59  
60

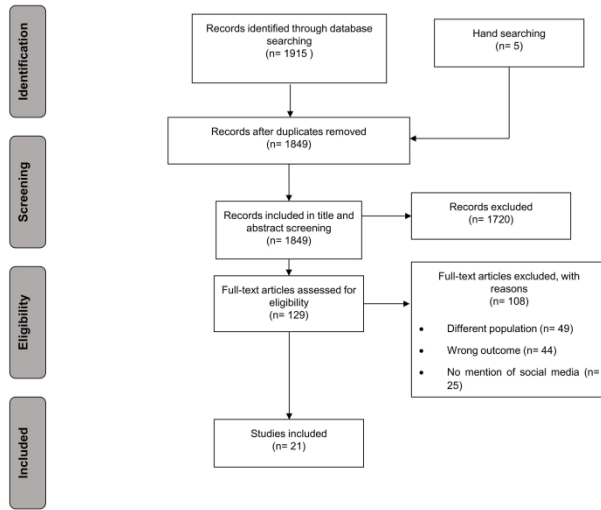

Figure 1 PRISMA diagram of search results

169x95mm (600 x 600 DPI)

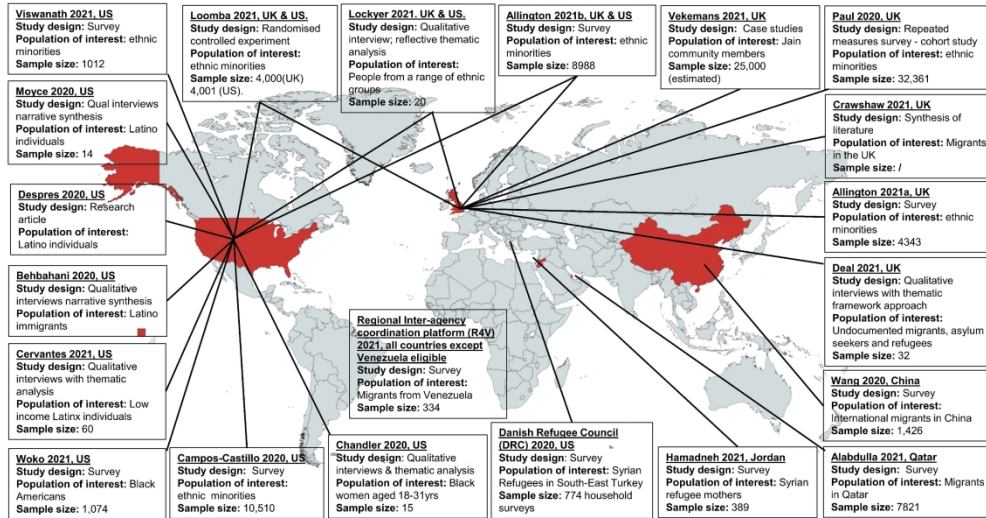

Figure 2 Regional distribution of included data sources

128x72mm (600 x 600 DPI)

## Supplementary file 1

### Online supplement 1: Boolean search terms

|                               |                                                                                                                                                                                                                                                                                                                                                                                                                                                                                                                                                                                                                                                                                                                                                                                                                                                                                                 |
|-------------------------------|-------------------------------------------------------------------------------------------------------------------------------------------------------------------------------------------------------------------------------------------------------------------------------------------------------------------------------------------------------------------------------------------------------------------------------------------------------------------------------------------------------------------------------------------------------------------------------------------------------------------------------------------------------------------------------------------------------------------------------------------------------------------------------------------------------------------------------------------------------------------------------------------------|
| Migrant and ethnic minorities | Ancest* OR Diaspor* OR ethnic* OR Ethnoc* OR Ethnog* OR "Identity politics" OR Ingroups OR outgroups OR Intersectionality OR Kinship OR "Minority group*"~3 OR "minority population*"~2 OR minorities OR Multicultu* OR Polyethnic* OR "Population genetics" OR Race OR races OR racial OR Tribe* OR latino*) OR AB:(Ancest* OR Diaspor* OR ethnic* OR Ethnoc* OR Ethnog* OR "Identity politics" OR Ingroups OR Outgroups OR Intersectionality OR Kinship OR "Minority group*"~3 OR "minority population*"~2 OR minorities OR Multicultu* OR Polyethnic* OR "Population genetics" OR Race OR races OR racial OR Tribe* OR latino*) OR "afro american*"~3 OR BAME OR latino* OR roma OR romani OR refugee* OR immigrant* OR "migrant" OR "displaced person" OR "displaced persons" OR "social determinant*"~2 OR "latin population" OR "latin group*" OR "people of color" OR "people of colour" |
| Social media                  | social media OR social network OR online communit* OR online discuss* OR online communicat* OR online post OR messag* OR chat OR media OR misinformat* OR disinformat* OR malinformat* OR fake new* OR twitter OR whatsapp OR tweet OR post OR instagram OR reddit OR weibo OR sina OR youtube OR tiktok OR snapchat OR pinterest OR likee OR sharechat OR discord OR kuaishou OR wechat OR weixin OR qq OR telegram OR quora OR mobile app OR blog OR podcast OR hashtag OR antivax* OR vaccine hesitanc* OR web 2.0 OR online                                                                                                                                                                                                                                                                                                                                                                 |

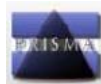

## PRISMA 2020 Checklist

| Section and Topic             | Item # | Checklist item                                                                                                                                                                                                                                                                                       | Location where item is reported        |
|-------------------------------|--------|------------------------------------------------------------------------------------------------------------------------------------------------------------------------------------------------------------------------------------------------------------------------------------------------------|----------------------------------------|
| <b>TITLE</b>                  |        |                                                                                                                                                                                                                                                                                                      |                                        |
| Title                         | 1      | Identify the report as a systematic review.                                                                                                                                                                                                                                                          | P1 on bottom right hand side numbering |
| <b>ABSTRACT</b>               |        |                                                                                                                                                                                                                                                                                                      |                                        |
| Abstract                      | 2      | See the PRISMA 2020 for Abstracts checklist.                                                                                                                                                                                                                                                         | P2,3                                   |
| <b>INTRODUCTION</b>           |        |                                                                                                                                                                                                                                                                                                      |                                        |
| Rationale                     | 3      | Describe the rationale for the review in the context of existing knowledge.                                                                                                                                                                                                                          | P3-5                                   |
| Objectives                    | 4      | Provide an explicit statement of the objective(s) or question(s) the review addresses.                                                                                                                                                                                                               | P6                                     |
| <b>METHODS</b>                |        |                                                                                                                                                                                                                                                                                                      |                                        |
| Eligibility criteria          | 5      | Specify the inclusion and exclusion criteria for the review and how studies were grouped for the syntheses.                                                                                                                                                                                          | P6,P7                                  |
| Information sources           | 6      | Specify all databases, registers, websites, organisations, reference lists and other sources searched or consulted to identify studies. Specify the date when each source was last searched or consulted.                                                                                            | P6                                     |
| Search strategy               | 7      | Present the full search strategies for all databases, registers and websites, including any filters and limits used.                                                                                                                                                                                 | P6 and Supplementary File 1            |
| Selection process             | 8      | Specify the methods used to decide whether a study met the inclusion criteria of the review, including how many reviewers screened each record and each report retrieved, whether they worked independently, and if applicable, details of automation tools used in the process.                     | P6,7                                   |
| Data collection process       | 9      | Specify the methods used to collect data from reports, including how many reviewers collected data from each report, whether they worked independently, any processes for obtaining or confirming data from study investigators, and if applicable, details of automation tools used in the process. | P6,7                                   |
| Data items                    | 10a    | List and define all outcomes for which data were sought. Specify whether all results that were compatible with each outcome domain in each study were sought (e.g. for all measures, time points, analyses), and if not, the methods used to decide which results to collect.                        | P7                                     |
|                               | 10b    | List and define all other variables for which data were sought (e.g. participant and intervention characteristics, funding sources). Describe any assumptions made about any missing or unclear information.                                                                                         | P7,8                                   |
| Study risk of bias assessment | 11     | Specify the methods used to assess risk of bias in the included studies, including details of the tool(s) used, how many reviewers assessed each study and whether they worked independently, and if applicable, details of automation tools used in the process.                                    | P7,8                                   |
| Effect measures               | 12     | Specify for each outcome the effect measure(s) (e.g. risk ratio, mean difference) used in the synthesis or presentation of results.                                                                                                                                                                  | P7                                     |
| Synthesis methods             | 13a    | Describe the processes used to decide which studies were eligible for each synthesis (e.g. tabulating the study intervention characteristics and comparing against the planned groups for each synthesis (item #5)).                                                                                 | N/A                                    |
|                               | 13b    | Describe any methods required to prepare the data for presentation or synthesis, such as handling of missing summary statistics, or data conversions.                                                                                                                                                | N/A                                    |
|                               | 13c    | Describe any methods used to tabulate or visually display results of individual studies and syntheses.                                                                                                                                                                                               | N/A                                    |
|                               | 13d    | Describe any methods used to synthesize results and provide a rationale for the choice(s). If meta-analysis was performed, describe the model(s), method(s) to identify the presence and extent of statistical heterogeneity, and software package(s) used.                                          | P7                                     |
|                               | 13e    | Describe any methods used to explore possible causes of heterogeneity among study results (e.g. subgroup analysis, meta-regression).                                                                                                                                                                 | N/A – NOT DONE                         |

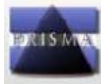

## PRISMA 2020 Checklist

| Section and Topic             | Item # | Checklist item                                                                                                                                                                                                                                                                       | Location where item is reported                 |
|-------------------------------|--------|--------------------------------------------------------------------------------------------------------------------------------------------------------------------------------------------------------------------------------------------------------------------------------------|-------------------------------------------------|
|                               |        |                                                                                                                                                                                                                                                                                      | FORMALLY.                                       |
|                               | 13f    | Describe any sensitivity analyses conducted to assess robustness of the synthesized results.                                                                                                                                                                                         | N/A – NOT DONE.                                 |
| Reporting bias assessment     | 14     | Describe any methods used to assess risk of bias due to missing results in a synthesis (arising from reporting biases).                                                                                                                                                              | N/A – NOT DONE , NOT SUITABLE FOR THIS STUDY    |
| Certainty assessment          | 15     | Describe any methods used to assess certainty (or confidence) in the body of evidence for an outcome.                                                                                                                                                                                | N/A – NOT DONE, NOT SUITABLE FOR THIS STUDY     |
| <b>RESULTS</b>                |        |                                                                                                                                                                                                                                                                                      |                                                 |
| Study selection               | 16a    | Describe the results of the search and selection process, from the number of records identified in the search to the number of studies included in the review, ideally using a flow diagram.                                                                                         | FIGURE 1 IS REFERRED TO ON PAGE 8               |
|                               | 16b    | Cite studies that might appear to meet the inclusion criteria, but which were excluded, and explain why they were excluded.                                                                                                                                                          | N/A – NOT DONE , NOT NEEDED HERE.               |
| Study characteristics         | 17     | Cite each included study and present its characteristics.                                                                                                                                                                                                                            | P8-9                                            |
| Risk of bias in studies       | 18     | Present assessments of risk of bias for each included study.                                                                                                                                                                                                                         | P9                                              |
| Results of individual studies | 19     | For all outcomes, present, for each study: (a) summary statistics for each group (where appropriate) and (b) an effect estimate and its precision (e.g. confidence/credible interval), ideally using structured tables or plots.                                                     | P10-P17; NOTE QUALITATIVE STUDIES ALSO INCLUDED |
| Results of syntheses          | 20a    | For each synthesis, briefly summarise the characteristics and risk of bias among contributing studies.                                                                                                                                                                               | P10-17                                          |
|                               | 20b    | Present results of all statistical syntheses conducted. If meta-analysis was done, present for each the summary estimate and its precision (e.g. confidence/credible interval) and measures of statistical heterogeneity. If comparing groups, describe the direction of the effect. | N/A – NOT QUANT SYNTHESIS                       |
|                               | 20c    | Present results of all investigations of possible causes of heterogeneity among study results.                                                                                                                                                                                       | N/A – NOT QUANT SYNTHESIS                       |
|                               | 20d    | Present results of all sensitivity analyses conducted to assess the robustness of the synthesized results.                                                                                                                                                                           | N/A – NOT QUANT                                 |

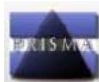

## PRISMA 2020 Checklist

| Section and Topic                              | Item # | Checklist item                                                                                                                                                                                                                             | Location where item is reported |
|------------------------------------------------|--------|--------------------------------------------------------------------------------------------------------------------------------------------------------------------------------------------------------------------------------------------|---------------------------------|
|                                                |        |                                                                                                                                                                                                                                            | SYNTHESIS                       |
| Reporting biases                               | 21     | Present assessments of risk of bias due to missing results (arising from reporting biases) for each synthesis assessed.                                                                                                                    | N/A – NOT QUANT SYNTHESIS       |
| Certainty of evidence                          | 22     | Present assessments of certainty (or confidence) in the body of evidence for each outcome assessed.                                                                                                                                        | N/A – NOT QUANT SYNTHESIS       |
| <b>DISCUSSION</b>                              |        |                                                                                                                                                                                                                                            |                                 |
| Discussion                                     | 23a    | Provide a general interpretation of the results in the context of other evidence.                                                                                                                                                          | P18-20                          |
|                                                | 23b    | Discuss any limitations of the evidence included in the review.                                                                                                                                                                            | P18                             |
|                                                | 23c    | Discuss any limitations of the review processes used.                                                                                                                                                                                      | P18-20                          |
|                                                | 23d    | Discuss implications of the results for practice, policy, and future research.                                                                                                                                                             | P18-23                          |
| <b>OTHER INFORMATION</b>                       |        |                                                                                                                                                                                                                                            |                                 |
| Registration and protocol                      | 24a    | Provide registration information for the review, including register name and registration number, or state that the review was not registered.                                                                                             | P3                              |
|                                                | 24b    | Indicate where the review protocol can be accessed, or state that a protocol was not prepared.                                                                                                                                             | P6                              |
|                                                | 24c    | Describe and explain any amendments to information provided at registration or in the protocol.                                                                                                                                            | N/A, NO AMENDMENTS              |
| Support                                        | 25     | Describe sources of financial or non-financial support for the review, and the role of the funders or sponsors in the review.                                                                                                              | P24                             |
| Competing interests                            | 26     | Declare any competing interests of review authors.                                                                                                                                                                                         | P25                             |
| Availability of data, code and other materials | 27     | Report which of the following are publicly available and where they can be found: template data collection forms; data extracted from included studies; data used for all analyses; analytic code; any other materials used in the review. | P23                             |

From: Page MJ, McKenzie JE, Bossuyt PM, Boutron I, Hoffmann TC, Mulrow CD, et al. The PRISMA 2020 statement: an updated guideline for reporting systematic reviews. *BMJ* 2021;372:n71. doi: 10.1136/bmj.n71  
 For more information, visit: <http://www.prisma-statement.org/>



# BMJ Open

## The use of social media platforms by migrant and ethnic minority populations during the COVID-19 pandemic: a systematic review

|                                 |                                                                                                                                                                                                                                                                                                                                                                                                                                                                                                                                                                                                                                                                                                                                                                                                                                                                                                                                                                                                                                                                                                                                                                                                                                                                                                                                                                                                                                                                                                                                                                                                                                                                                                                                                               |
|---------------------------------|---------------------------------------------------------------------------------------------------------------------------------------------------------------------------------------------------------------------------------------------------------------------------------------------------------------------------------------------------------------------------------------------------------------------------------------------------------------------------------------------------------------------------------------------------------------------------------------------------------------------------------------------------------------------------------------------------------------------------------------------------------------------------------------------------------------------------------------------------------------------------------------------------------------------------------------------------------------------------------------------------------------------------------------------------------------------------------------------------------------------------------------------------------------------------------------------------------------------------------------------------------------------------------------------------------------------------------------------------------------------------------------------------------------------------------------------------------------------------------------------------------------------------------------------------------------------------------------------------------------------------------------------------------------------------------------------------------------------------------------------------------------|
| Journal:                        | <i>BMJ Open</i>                                                                                                                                                                                                                                                                                                                                                                                                                                                                                                                                                                                                                                                                                                                                                                                                                                                                                                                                                                                                                                                                                                                                                                                                                                                                                                                                                                                                                                                                                                                                                                                                                                                                                                                                               |
| Manuscript ID                   | bmjopen-2022-061896.R1                                                                                                                                                                                                                                                                                                                                                                                                                                                                                                                                                                                                                                                                                                                                                                                                                                                                                                                                                                                                                                                                                                                                                                                                                                                                                                                                                                                                                                                                                                                                                                                                                                                                                                                                        |
| Article Type:                   | Original research                                                                                                                                                                                                                                                                                                                                                                                                                                                                                                                                                                                                                                                                                                                                                                                                                                                                                                                                                                                                                                                                                                                                                                                                                                                                                                                                                                                                                                                                                                                                                                                                                                                                                                                                             |
| Date Submitted by the Author:   | 17-Aug-2022                                                                                                                                                                                                                                                                                                                                                                                                                                                                                                                                                                                                                                                                                                                                                                                                                                                                                                                                                                                                                                                                                                                                                                                                                                                                                                                                                                                                                                                                                                                                                                                                                                                                                                                                                   |
| Complete List of Authors:       | <p>Goldsmith, Lucy; St George's University of London, The Migrant Health Research Group, Institute for Infection and Immunity; St George's University of London, Population Health Research Institute</p> <p>Rowland-Pomp, May; St George's University of London, The Migrant Health Research Group, Institute for Infection and Immunity</p> <p>Hanson, Kristin; Kingston University, Faculty of Health, Social Care and Education</p> <p>Deal, Anna; St George's University of London, The Migrant Health Research Group, Institute for Infection and Immunity; London School of Hygiene and Tropical Medicine Faculty of Public Health and Policy</p> <p>Crawshaw, Alison; St George's University of London, The Migrant Health Research Group, Institute for Infection and Immunity</p> <p>Hayward, Sally; St George's University of London, The Migrant Health Research Group, Institute for Infection and Immunity</p> <p>Knights, Felicity; St George's University of London, The Migrant Health Research Group, Institute for Infection and Immunity; St George's University of London, Population Health Research Institute</p> <p>Carter, Jessica; St George's University of London, The Migrant Health Research Group, Institute for Infection and Immunity</p> <p>Ahmad, Ayesha; St George's University of London, Institute of Medical and Biomedical Education</p> <p>Razai, M; St George's University of London, Population Health Research Institute</p> <p>Vandrevala, Tushna; Kingston University, Centre for Applied Health and Social Care Research, Faculty of Health, Social Care and Education</p> <p>Hargreaves, Sally; St George's University of London, The Migrant Health Research Group, Institute for Infection and Immunity</p> |
| <b>Primary Subject Heading</b>: | Global health                                                                                                                                                                                                                                                                                                                                                                                                                                                                                                                                                                                                                                                                                                                                                                                                                                                                                                                                                                                                                                                                                                                                                                                                                                                                                                                                                                                                                                                                                                                                                                                                                                                                                                                                                 |
| Secondary Subject Heading:      | Infectious diseases                                                                                                                                                                                                                                                                                                                                                                                                                                                                                                                                                                                                                                                                                                                                                                                                                                                                                                                                                                                                                                                                                                                                                                                                                                                                                                                                                                                                                                                                                                                                                                                                                                                                                                                                           |
| Keywords:                       | Public health < INFECTIOUS DISEASES, COVID-19, World Wide Web technology < BIOTECHNOLOGY & BIOINFORMATICS, Infection control < INFECTIOUS DISEASES, MEDICAL JOURNALISM                                                                                                                                                                                                                                                                                                                                                                                                                                                                                                                                                                                                                                                                                                                                                                                                                                                                                                                                                                                                                                                                                                                                                                                                                                                                                                                                                                                                                                                                                                                                                                                        |
|                                 |                                                                                                                                                                                                                                                                                                                                                                                                                                                                                                                                                                                                                                                                                                                                                                                                                                                                                                                                                                                                                                                                                                                                                                                                                                                                                                                                                                                                                                                                                                                                                                                                                                                                                                                                                               |

1  
2  
3  
4  
5  
6  
7  
8  
9  
10  
11  
12  
13  
14  
15  
16  
17  
18  
19  
20  
21  
22  
23  
24  
25  
26  
27  
28  
29  
30  
31  
32  
33  
34  
35  
36  
37  
38  
39  
40  
41  
42  
43  
44  
45  
46  
47  
48  
49  
50  
51  
52  
53  
54  
55  
56  
57  
58  
59  
60

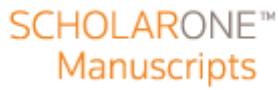



I, the Submitting Author has the right to grant and does grant on behalf of all authors of the Work (as defined in the below author licence), an exclusive licence and/or a non-exclusive licence for contributions from authors who are: i) UK Crown employees; ii) where BMJ has agreed a CC-BY licence shall apply, and/or iii) in accordance with the terms applicable for US Federal Government officers or employees acting as part of their official duties; on a worldwide, perpetual, irrevocable, royalty-free basis to BMJ Publishing Group Ltd ("BMJ") its licensees and where the relevant Journal is co-owned by BMJ to the co-owners of the Journal, to publish the Work in this journal and any other BMJ products and to exploit all rights, as set out in our [licence](#).

The Submitting Author accepts and understands that any supply made under these terms is made by BMJ to the Submitting Author unless you are acting as an employee on behalf of your employer or a postgraduate student of an affiliated institution which is paying any applicable article publishing charge ("APC") for Open Access articles. Where the Submitting Author wishes to make the Work available on an Open Access basis (and intends to pay the relevant APC), the terms of reuse of such Open Access shall be governed by a Creative Commons licence – details of these licences and which [Creative Commons](#) licence will apply to this Work are set out in our licence referred to above.

Other than as permitted in any relevant BMJ Author's Self Archiving Policies, I confirm this Work has not been accepted for publication elsewhere, is not being considered for publication elsewhere and does not duplicate material already published. I confirm all authors consent to publication of this Work and authorise the granting of this licence.

# The use of social media platforms by migrant and ethnic minority populations during the COVID-19 pandemic: a systematic review

Lucy P Goldsmith<sup>1,2+</sup>

May Rowland-Pomp<sup>1+</sup>

Kristin Hanson<sup>3+</sup>

Anna Deal<sup>1, 4</sup>

Alison F Crawshaw<sup>1</sup>

Sally E. Hayward<sup>1,4</sup>

Felicity Knights<sup>1,2</sup>

Jessica Carter<sup>1</sup>

Ayesha Ahmad<sup>5</sup>

Mohammad Razai<sup>2</sup>,

Tushna Vandrevalla<sup>Ψ</sup>

Sally Hargreaves<sup>1\* Ψ</sup>

<sup>1</sup>The Migrant Health Research Group, Institute for Infection and Immunity, St George's, University of London

<sup>2</sup>Population Health Research Institute, St George's, University of London

<sup>3</sup> Faculty of Health, Social Care and Education, Kingston University & St George's, University of London

<sup>4</sup> Faculty of Public Health and Policy, London School of Hygiene and Tropical Medicine

<sup>5</sup> Institute of Medical and Biomedical Education, St George's, University of London

<sup>+</sup>Joint first authors

<sup>Ψ</sup> Joint senior authors

\*Corresponding author: Dr Sally Hargreaves; The Migrant Health Research Group, Institute for Infection and Immunity, St George's, University of London

[s.hargreaves@sgul.ac.uk](mailto:s.hargreaves@sgul.ac.uk)

## Abstract

**Objective** Migrants and ethnic minority groups have been disproportionately impacted by COVID-19 and have lower levels of vaccine uptake in some contexts. We aimed to determine the extent and nature of social media use in migrant and ethnic minority communities for COVID-19 information, and implications for preventative health measures including vaccination intent and uptake.

**Design** A systematic review of published and grey literature following the PRISMA guidelines. We searched databases including Embase, Web of Science, PubMed NIH, CINAHL, facilitated through the WHO Global Research on COVID-19 database from 31/12/2019 to 9/6/2021.

**Eligibility Criteria for study selection** Research reporting the use of social media by migrants and/or ethnic minority groups in relation to COVID-19.

**Data extraction** We extracted data on key outcomes, study design, country, population under study, and sample size.

**Results** 1849 unique records were screened, and 21 data sources included including populations in the UK, US, China, Jordan, Qatar, and Turkey. We found evidence of consistent use of a range of social media platforms for COVID-19 information in some migrant and ethnic minority populations (including WeChat, Facebook, WhatsApp, Instagram, Twitter, YouTube), which may stem from difficulty in accessing COVID-19 information in their native languages or from trusted sources. Some evidence suggested circulating misinformation and social media use may be associated with lower participation in preventative health measures, including vaccine intent and uptake, findings which are likely relevant to multiple population groups.

**Conclusions** Social media platforms are an important source of information about COVID-19 for some migrant and ethnic minority populations. Urgent actions and further research are now needed to better understand effective approaches to tackling circulating misinformation, and to seize on opportunities to better use social media platforms to support public health communication and improve vaccine uptake.

**Registration** This study has been registered with PROSPERO;(CRD42021259190).

## Strengths and Limitations of this study

- Comprehensive systematic review methods were used, following Preferred Reporting Items for Systematic Reviews and Meta-Analyses (PRISMA) guidelines.

- Both published and grey literature were searched and papers from all countries and all regions were included, allowing available evidence to be synthesised.
- We acknowledge the limited geographical scope of included studies, with and no data from low-income countries.

## Introduction

The pandemic has been accompanied by an infodemic, defined as an excess of information during a disease outbreak – including false or misleading information in digital and physical environments<sup>1</sup> – that makes it difficult to distinguish reliable information from misinformation including disinformation (deliberate misinformation) and conspiracy theories. The World Health Organization (WHO) highlights that in all communities, infodemics cause ‘confusion and risk-taking behaviours that can harm health...it leads to mistrust in health authorities and undermines the public health response, and can intensify or lengthen outbreaks’<sup>1</sup>. The rapid expansion of internet and social media use, in particular, in recent years (including platforms such as Twitter, WhatsApp, and YouTube; Table 1) has meant that both useful and potentially harmful health information can spread rapidly. Although social media can be used to disseminate factual, appropriate and useful information, a large proportion of the most popular COVID-19 videos on YouTube, for example, have been found to contain misinformation, or no factual information, reaching millions of people worldwide<sup>2 3</sup>. YouTube is considered a major platform for information concerning the control of COVID-19, but most COVID-19 videos were of ‘undesirable quality’ containing few government/public health recommendations according to a recent study<sup>4</sup>. A review of YouTube videos on general vaccination found 65% expressed anti-vaccination sentiment<sup>5</sup>, with anti-vaccine posts more likely to be recirculated on Twitter<sup>2</sup>. The spread of misinformation and disinformation has been highlighted as a major risk to ending the COVID-19 pandemic – including undermining trust in vaccines<sup>6</sup> – with researchers highlighting links between misinformation on social media and public doubts around vaccine safety, self-reported compliance with public health guidelines, and intent to vaccinate<sup>7 8</sup>.

**Table 1: Popular social media platforms**  
**Statistics from Statista (2021) <sup>9</sup>**

| Platform                          | Primary Feature                                                                                                                                                                     | Country of origin | Organisation             | Users                            | Notes                                                    |
|-----------------------------------|-------------------------------------------------------------------------------------------------------------------------------------------------------------------------------------|-------------------|--------------------------|----------------------------------|----------------------------------------------------------|
| YouTube                           | Online video sharing and social media platform. Free to use.                                                                                                                        | US                | Google                   | Approximately >2 billion monthly | Searchable.                                              |
| WhatsApp                          | Messaging platform, allows users to send text messages and voice messages, make voice and video calls, and share images, documents, user locations, and other content. Free to use. | US                | Meta                     | Approximately >2 billion monthly | Not searchable. Groups can have 512 users in them.       |
| Instagram                         | Photo and video sharing social networking site. Free to use.                                                                                                                        | US                | Meta                     | Approximately 1 billion monthly  | Searchable. Some content is limited to connections only. |
| Facebook                          | Social networking service, allows messaging, image and video sharing, marketplace online shopping, live video sharing. Free to use.                                                 | US                | Meta                     | 2.89 billion active monthly      | Searchable. Some content is limited to connections only. |
| WeChat                            | Instant messaging, social media, mobile payment. Free to use.                                                                                                                       | China             | Tencent Holdings Limited | 1.25 billion monthly             | Searchable. Some content is limited to connections only. |
| TikTok (Known in China as Douyin) | Video sharing focused on short form videos (15 seconds – 3 minutes). Free to use.                                                                                                   | China             | ByteDance                | 837 million monthly active       | Searchable. Some content is limited to connections only. |
| Snapchat                          | Photo sharing multimedia app with video features. Free to use.                                                                                                                      | US                | Snap Inc.                | 347.3 million monthly active     | Searchable. Some content is limited to connections only. |
| Twitter                           | Microblogging focused on short messages known as 'tweets'. Live chat event function Tweetchat.                                                                                      | US                | Twitter Inc.             | 330 million monthly active       | Searchable. Some content is limited to followers only.   |

Although social media platforms are commonly used in the general population, and patterns of use are complex across different population groups<sup>8 10</sup>, some migrant and ethnic minority groups – who may experience barriers to accessing health information and health systems – may be more reliant on social media and the internet as

1 a source of health information. These communities may also draw on diaspora media as a source of health  
2 information<sup>11</sup>. The COVID-19 pandemic has disproportionately impacted and exacerbated inequalities faced by  
3 migrants and ethnically diverse communities - ethnic minority groups (including some migrant populations)  
4 were are higher risk of contracting, being hospitalised with, and dying from COVID-19<sup>12 13 11 14-16</sup>. They are also  
5 more likely to be vaccine hesitant - with lower take-up of preventative health measures, such as vaccines, noted  
6 in some groups due to a range of personal, societal, and physical barriers<sup>13 15 17</sup>. Some migrant and ethnic  
7 minority communities may be more exposed to social media misinformation because of access barriers to  
8 accurate information (eg, from official government sources)<sup>18 19</sup>, due to restricted eligibility and access to  
9 services, language barriers, and low health literacy. However, little is known about the extent and nature of  
10 social media use in these populations, nor the impact that social media use has had on preventative health  
11 measures during the pandemic, including COVID-19 vaccine uptake. In addition, there is an opportunity now to  
12 explore the extent to which social media platforms could be better used to support information sharing and  
13 promote public health messaging in marginalised communities during the pandemic and beyond.

14  
15  
16  
17  
18  
19  
20  
21  
22  
23  
24  
25  
26 We therefore did a systematic review to explore and assess the extent and nature of social media use by migrant  
27 and ethnic minority groups to access COVID-19 health information, the extent to which misinformation on social  
28 media may have influenced views about COVID-19 preventative measures including vaccination intention and  
29 uptake, and to explore good practice.

## 30 31 32 33 34 35 **Methods**

### 36 37 38 39 **Search Strategy**

40  
41 The review was registered with PROSPERO (CRD42021259190)<sup>20</sup> and followed PRISMA guidelines<sup>21</sup>. The study  
42 protocol is in the PROSPERO registration. A Boolean search strategy was developed containing terms relating to  
43 migrants, ethnic minorities, COVID-19, social media, and misinformation (see Supplementary file 1). We  
44 included papers covering any prevention topic, including social distancing, hand washing, mask wearing, testing,  
45 isolation, test and trace activities and vaccination. We searched the following databases: Embase, Web of  
46 Science, Oxford Academic Journals, PubMed NIH, Clinical Trials, China CDC MMWR, CDC reports, ProQuest  
47 Central (Proquest), CINAHL, Africa Wide Information (Ebsco), Scopus, PsycInfo, CAB Abstracts, Global Health, J  
48 Stage, Science Direct, Wiley Online Journals, JAMA Network, British Medical Journal, Mary Ann Liebert, New  
49 England Journal of Medicine, Sage Publications, Taylor and Francis Online, Springer Link, Biomed Central, MDPI,  
50 ASM, PLOS, The Lancet, Cell Press, and pre-print sites chemRxiv, SSRNbioRxiv, and medRxiv. This was facilitated



1 through the WHO Global Research on COVID-19 database. We searched records from the date the WHO was  
2 first informed of COVID-19, 31/21/2019,<sup>22</sup> to 9/6/2021 ( [https://search.bvsalud.org/global-literature-on-novel-](https://search.bvsalud.org/global-literature-on-novel-coronavirus-2019-ncov/)  
3 [coronavirus-2019-ncov/](https://search.bvsalud.org/global-literature-on-novel-coronavirus-2019-ncov/) ). The WHO's COVID-19 Database<sup>23</sup>, is a daily updated multilingual resource of all  
4 literature (peer-reviewed literature, pre-prints and grey literature) pertaining to COVID-19.  
5  
6

7  
8  
9 Records were imported to Rayyan QCRI<sup>24</sup>. Both title and abstract screening and full text screening were  
10 conducted independently by two reviewers (MR-P and LG) using Rayyan QCRI<sup>24</sup>. Additional relevant papers and  
11 grey literature (e.g. from third-sector organisation websites) were identified using hand searching including  
12 backwards and forwards citation tracking.  
13  
14  
15

### 16 17 18 19 Selection criteria and primary outcomes

20  
21 Papers reporting the use of social media platforms and implications for preventative health measures and  
22 vaccination intent of migrants and/or ethnic minority groups to COVID-19 globally were eligible. All types of  
23 COVID-19 preventative health measures, including social distancing, hand washing, mask wearing, testing,  
24 isolating, tracing close contacts of people who have COVID-19, alongside preventative measures based on  
25 misinformation were included. To include all available evidence, all types of scientific articles, reports and  
26 commentaries, editorials, correspondence letters were eligible for inclusion. Social media platforms were  
27 defined as any medium whereby content (including images, videos, and messages) is circulated to the general  
28 public and may include YouTube, Facebook, Twitter, TikTok, and Snapchat. 'Migrants' were defined as foreign-  
29 born, residing outside of their country of birth. An ethnic minority group was defined as a group of people with  
30 a shared culture, tradition, language, history, living in a country where most people are from a different ethnic  
31 group, and will include migrants/foreign-born populations alongside individuals born in the host country. Where  
32 studies reported a general population sample, results about migrant/ethnic minority groups within that sample  
33 were eligible for inclusion. No papers were excluded based on language or geographical origin. Studies were  
34 excluded if it was not possible to determine whether individual(s) in the population studied were migrants or  
35 from an ethnic minority group.  
36  
37  
38  
39  
40  
41  
42  
43  
44  
45  
46  
47  
48  
49

### 50 51 Data Extraction, critical appraisal, and synthesis

52 Data extraction was completed independently by two researchers (MRP and LG) using a piloted, structured data  
53 extraction sheet in Microsoft Excel. Fields in the data extraction sheet included author and year, dates for data  
54 collection, location of study, location of population of interest, whether qualitative methods were used, whether  
55 quantitative methods were used, study design, whether there was an intervention, the type of intervention,  
56  
57  
58  
59

1 methodology, population of interest, further information about population, sample size, type of social media,  
2 misinformation type, participant recruitment strategy, and all outcomes. Outcomes were extracted as reported.  
3  
4 Risk of bias was assessed independently by two researchers (LG, MRP) using the Quality assessment for Survey  
5 Studies in Psychology for Surveys (Q-SSP)<sup>25</sup> for quantitative studies. The twenty items on this scale can be rated  
6 as “yes”, or “no”, “not stated clearly”, or “not applicable”. Scores are calculated by dividing the “yes” answers  
7 by the total number of applicable items, with scores over 70% indicating “acceptable” quality. The Critical  
8 Appraisal Skills programme (CASP) checklist was used for qualitative studies<sup>26</sup>. The ten items can be rated ‘yes’,  
9 ‘can’t tell’ or ‘no’. We rated the CASP by dividing the “yes” answers by the total number of applicable items,  
10 with a score of over 60% indicating “acceptable” quality. We did not exclude any papers on the basis of quality.  
11 The selection of risk of bias rating instruments were finalised once we had a complete list of the type methods  
12 used in the included studies. We used a mixed methods<sup>27</sup> narrative synthesis<sup>28</sup> approach, synthesising the  
13 qualitative and quantitative data together by theme.  
14

## 22 Patient and public involvement

23 Patients and/or the public were not involved in the design, conduct, reporting or dissemination plans of this  
24 research, however, three of the authors are from racially minoritized groups and three authors are migrants  
25 living in the UK.  
26  
27  
28  
29  
30

## 31 Results

### 35 Overview of data sources

36 Following de-duplication, 1849 unique data sources were identified and screened and ultimately 129 were full-  
37 text screened. 21 data sources were included in the final analysis (Figure 1). Six studies were conducted in the  
38 UK<sup>29-34</sup>, two were jointly conducted in the UK and US<sup>35-36</sup>. An additional eight studies were conducted in the  
39 US,<sup>37-44</sup> and one each in China,<sup>45</sup> Jordan,<sup>46</sup> Qatar,<sup>47</sup> and Turkey.<sup>48</sup> Eight studies reported on migrants,<sup>32-34-37-45-49</sup>  
40 including migrants in the host countries of China<sup>45</sup>, Jordan<sup>46</sup>, Qatar,<sup>47</sup> Turkey<sup>48</sup>, and the US<sup>37</sup> and UK<sup>32-34</sup>, and  
41 one study involved predominantly migrants from Venezuela residing in other countries.<sup>49</sup> Nine studies reported  
42 about a specific ethnic minority or group (Latino individuals,<sup>37-39-41-42</sup> Black American citizens,<sup>40-44</sup> Jain community  
43 members<sup>33</sup> and Syrian migrants<sup>46-48</sup>). Seven studies reported about ethnic minority groups generally<sup>29-31-35-36-38</sup>  
44  
45  
46  
47  
48  
49  
50  
51  
52  
53  
54  
55  
56  
57  
58  
59  
60  
<sup>43</sup>. A survey design was the most common design, used in half of included studies.

Characteristics of included studies are presented in Table 2, including the risk of bias assessment scores. Quality  
scores ranged from 76% to 90% for included papers, suggesting acceptable quality of all included data sources

1 where quality assessment was applicable. The most common shortcomings for studies related to reporting  
2 about the ethics and participants. None of the included studies were preprints.

3  
4 Supplementary material 2 shows the geographical location of data sources, highlighting the absence of  
5 published and unpublished data on this topic from most regions of the world.  
6  
7  
8  
9  
10  
11  
12  
13  
14  
15  
16  
17  
18  
19  
20  
21  
22  
23  
24  
25  
26  
27  
28  
29  
30  
31  
32  
33  
34  
35  
36  
37  
38  
39  
40  
41  
42  
43  
44  
45  
46  
47  
48  
49  
50  
51  
52  
53  
54  
55  
56  
57  
58  
59  
60

**Table 2: Characteristics of included studies**

| Included study                                                       | Location of study                           | Study design                                                                    | Population under study                          | Type of publication                    | Main topic of the paper                                                                                                | Sample size              | Quality rating*  |
|----------------------------------------------------------------------|---------------------------------------------|---------------------------------------------------------------------------------|-------------------------------------------------|----------------------------------------|------------------------------------------------------------------------------------------------------------------------|--------------------------|------------------|
| Alabdulla 2021 <sup>47</sup>                                         | Qatar                                       | Cross-sectional survey                                                          | Non-Qatari residents                            | Peer reviewed journal                  | Vaccine hesitancy                                                                                                      | 7821                     | 76% <sup>1</sup> |
| Allington 2021(a) <sup>31</sup>                                      | UK                                          | Cross-sectional survey                                                          | Non-White ethnic groups                         | Peer reviewed journal                  | Vaccine attitudes, trust and COVID-19 information source as predictors of vaccine hesitancy                            | 4343                     | 82% <sup>1</sup> |
| Allington 2021(b) <sup>36</sup>                                      | UK                                          | Cross-sectional survey                                                          | Non-White ethnic groups                         | Peer reviewed journal                  | Media usage predicts intention to be vaccinated against COVID-19                                                       | 8988                     | 89% <sup>1</sup> |
| Behbahani 2020 <sup>37</sup>                                         | US                                          | Organisational case study                                                       | Latino migrants                                 | Peer reviewed journal                  | Helping vulnerable migrant populations in the COVID-19 crisis                                                          | N/K                      | N/A <sup>1</sup> |
| Campos-Castillo 2020 <sup>38</sup>                                   | US                                          | Cross-sectional survey                                                          | Non-White ethnic groups                         | Peer reviewed journal                  | Racial and ethnic digital divides in posting COVID-19 content on social media                                          | 10,510                   | 88% <sup>1</sup> |
| Cervantes 2021 <sup>39</sup>                                         | US                                          | Qualitative interviews with thematic analysis                                   | Low-income Latino individuals                   | Peer reviewed journal                  | Experiences of Latinx individuals hospitalized for COVID-19 - misinformation and disbelief                             | 60                       | 90% <sup>3</sup> |
| Chandler 2020 <sup>40</sup>                                          | US                                          | Qualitative interviews with thematic analysis                                   | Black women (18-31yrs)                          | Peer reviewed journal                  | Evaluating the perspectives and sources of information of Black women about COVID-19                                   | 15                       | 90% <sup>3</sup> |
| Crawshaw 2021 <sup>32</sup>                                          | UK                                          | Evidence synthesis linked to outputs from participatory workshops with migrants | International migrants                          | Peer reviewed journal                  | Vaccine hesitancy and barriers to COVID-19 vaccination in migrants                                                     | N/K                      | N/A <sup>2</sup> |
| Despres 2020 <sup>41</sup>                                           | US                                          | Organisational case study                                                       | Latino community living in America              | Peer reviewed journal                  | A digital content curation model to challenge the inequitable impacts of COVID-19 on U.S. Latinos.                     | N/K                      | N/A <sup>2</sup> |
| Danish Refugee Council (DRC) 2020 <sup>48</sup>                      | Turkey                                      | Cross-sectional survey                                                          | Syrian refugees in South-East Turkey            | Research-based needs assessment report | The impact of COVID-19 on refugees in South-East Turkey                                                                | 774                      | 82% <sup>1</sup> |
| Hamadneh 2021 <sup>46</sup>                                          | Jordan                                      | Cross-sectional survey                                                          | Syrian refugee mothers                          | Peer reviewed journal                  | Knowledge and attitudes about COVID-19 among Syrian refugee women in Jordan                                            | 389                      | 78% <sup>1</sup> |
| Lockyer 2021 <sup>29</sup>                                           | UK                                          | Qualitative interview; reflective thematic analysis                             | People from different ethnic groups in Bradford | Peer reviewed journal                  | COVID-19 misinformation and vaccine hesitancy in context                                                               | 20                       | 90% <sup>3</sup> |
| Loomba 2021 <sup>35</sup>                                            | UK & USA                                    | Randomised controlled experiment                                                | Other ethnic groups than White                  | Peer reviewed journal                  | The impact of COVID-19 vaccine misinformation on vaccination intent                                                    | 4,000 (UK)<br>4,001 (US) | N/A <sup>2</sup> |
| Moyce 2020 <sup>42</sup>                                             | US                                          | Qual interviews narrative synthesis                                             | Latino individuals                              | Peer reviewed journal                  | Perceptions of COVID-19, news about COVID-19 and approaches to protecting health                                       | 14                       | 90% <sup>3</sup> |
| Paul 2021 <sup>30</sup>                                              | UK                                          | Repeated measures survey; cohort study                                          | Other ethnic groups than White                  | Peer reviewed journal                  | Attitudes towards COVID-19 vaccines, vaccine intent and implications for public health messaging                       | 32,361                   | 89% <sup>1</sup> |
| Regional Inter-agency coordination platform (R4V) 2021 <sup>49</sup> | Any host county for migrants from Venezuela | Cross-sectional survey                                                          | Predominantly migrants from Venezuela           | Research-based report                  | The difficulties encountered by refugees and migrants in the COVID-19 infodemic. Misinformation and vaccine hesitancy. | 334                      | 90% <sup>3</sup> |

|   |                                    |       |                                      |                                                                       |                       |                                                                                                                           |                 |                  |
|---|------------------------------------|-------|--------------------------------------|-----------------------------------------------------------------------|-----------------------|---------------------------------------------------------------------------------------------------------------------------|-----------------|------------------|
| 1 | <b>Vekemans 2021<sup>33</sup></b>  | UK    | Organisational case study            | Jain community members                                                | Peer reviewed journal | The re-location of the Jain community into the digital realm during the COVID-19 pandemic                                 | 25,000 estimate | N/A <sup>2</sup> |
| 2 | <b>Viswanath 2021<sup>43</sup></b> | US    | Cross-sectional survey               | Non-White ethnic groups                                               | Peer reviewed journal | Individual and social determinants of COVID-19 vaccine uptake                                                             | 1012            | 78% <sup>1</sup> |
| 3 | <b>Wang 2020<sup>45</sup></b>      | China | Cross-sectional survey               | International migrants                                                | Peer reviewed journal | COVID-19 knowledge, attitudes and sources of knowledge among international migrants in China                              | 1,426           | 78% <sup>1</sup> |
| 4 | <b>Woko 2021<sup>44</sup></b>      | US    | Cross-sectional survey               | Black American citizens                                               | Peer reviewed journal | The role of beliefs and trust in COVID-19 information sources in low COVID-19 vaccination intention among Black Americans | 1,074           | 77% <sup>1</sup> |
| 5 | <b>Deal 2021<sup>34</sup></b>      | UK    | Qualitative in-depth interview study | Precarious migrants (asylum seekers, undocumented migrants, refugees) | Peer reviewed journal | Action points to promote the equitable uptake of COVID-19 vaccinations for precarious migrants                            | 32              | 90% <sup>3</sup> |

\*Scores were calculated on both scales by dividing the “yes” answers by the total number of applicable items.

<sup>1</sup> Quality assessment for Survey Studies in Psychology for Surveys (Q-SSP) Checklist for surveys

<sup>2</sup> N/A = not applicable due to research item design.

<sup>3</sup> Critical Appraisal Skills programme (CASP) checklist

## Use of social media platforms as a source of information about COVID-19

For some migrants and ethnic minority groups, consistent use of social media platforms for sharing and receiving COVID-19-related health information was reported in several included studies<sup>34 39-41 45-47 49 48</sup>. Figure 2 highlights quantitative datasets showing use of social media for information about COVID-19. Social media was reported to be the preferred source of information about COVID-19 for international migrants in China (WeChat was used by 94.5% of respondents for COVID-19 information).<sup>45</sup> Among 389 Syrian refugee mothers in Jordan<sup>46</sup>, Facebook and WhatsApp were the main sources of information for 87% and 69% of respondents respectively for COVID-19 information; with 21% indicating that they accessed information from professional databases or government websites, and 53% via television (this survey was circulated via Facebook and WhatsApp). Migrants from Venezuela (residing in numerous countries) reported Facebook and WhatsApp were their two primary sources of information about COVID-19 in a survey of 334 migrants<sup>49</sup>. A survey of 774 refugee households in Southeast Turkey<sup>48</sup> found the majority (75%) obtained COVID-19 information from Facebook, YouTube, Twitter and the internet in general, 15% via SMS/WhatsApp messages, followed by radio/TV (64%) and members of their community/family (34%); only 10% reported getting information from Non-governmental organisations (NGO)/United Nations (UN) sources. This study concluded that the heavy reliance on social media for information may expose a sizeable proportion of refugee households to fake or inaccurate information. In a US study of Black women aged 18-31 years, 58% of respondents reported using social media (Instagram and Facebook) to obtain COVID-19 information<sup>40</sup>.

Participants from the US Latino community described relying on social media for information about the pandemic<sup>39</sup>. In Qatar, migrants reported they preferred to find out about COVID-19 using their own personal research or searching for information, including using social media as a source<sup>47</sup>. A study of precarious migrants (asylum seekers, undocumented migrants) in the UK found many relied on social media (WhatsApp groups, Facebook) for information on the pandemic and the ongoing vaccination programme<sup>34</sup>.

A key theme emerging in one UK study of ethnic minority groups<sup>29</sup> was that the “avalanche” of information surrounding COVID-19 had led to interviewees feeling overwhelmed and confused: participants reported using a variety of sources of information, including TV, radio, news stations in Pakistan, India, Slovakia, and Poland, online newspapers, Facebook, WhatsApp, Twitter, Google, and medical journals. A number of these participants said they dismissed some stories encountered on WhatsApp and Facebook; however, the sheer volume of messages coupled with the fact that people they trusted were sharing them, proved difficult to ignore, with participants raising concerns about how quickly social media stories were shared. One study exploring the views

1 of US Latinos reported that they consulted national and local news reports for information about COVID-19 and  
2 many reported that they got their news from Spanish-language news due to difficulty in understanding news in  
3 English; some received their news from social media sources, including Facebook, but expressed caution around  
4 messages from social media as there was no way to ensure the accuracy of the reports.<sup>42</sup> Language barriers  
5 were also reported in the Syrian refugee population in South-East Turkey, who typically prefer information in  
6 Arabic,<sup>48</sup> the Latino population in the U.S,<sup>37 39 41</sup> for people from a range of ethnic groups in Bradford<sup>29</sup> and for  
7 international migrants.<sup>32</sup>  
8  
9  
10  
11  
12  
13  
14

15 According to one study, members of ethnic minority groups were also more likely to post COVID-19 content on  
16 social media than White individuals<sup>38</sup>, with respondents who identified as Black (odds ratio [OR] 1.29, 95% CI  
17 1.02-1.64; P=.03), Latino (OR 1.66, 95% CI 1.36-2.04; P<.001), or other races/ethnicities (OR 1.33, 95% CI 1.02-  
18 1.72; P=.03) had higher odds than respondents who identified as White of reporting posting COVID-19 content  
19 on social media.  
20  
21  
22  
23  
24

### 25 Drivers of social media reliance

26 Studies reported that some migrant and ethnic minority groups turned to social media as a result of a need for  
27 connection and to acquire accessible information from people they considered to be reliable sources.<sup>33 42</sup> For  
28 the Latino community in the US, faith and community bonds were valued ways of coping with the difficulties of  
29 the pandemic which included feelings of social isolation, stress, and uncertainty and – according to one study –  
30 social media facilitated these connections in a virtual space<sup>42</sup>. The Jain community in London used social media  
31 to communicate news and knowledge about COVID-19 and stay connected online, with events moving to a  
32 virtual space; individuals reportedly benefited from and were grateful for this community use of social media<sup>33</sup>.  
33  
34  
35  
36  
37  
38  
39  
40

41 Several studies highlight concerns that some migrant and ethnic minority groups were unable to find official  
42 information in their host country in their native language about various aspects of COVID-19, hence their  
43 reliance on social media<sup>29 32 34 45 48</sup>. For example, a UK study of precarious migrants (asylum seekers,  
44 undocumented migrants) reported that those feeling most abandoned or scared due to a lack of  
45 understandable, clear official information in the early stages of the pandemic were more likely to rely on word-  
46 of-mouth or social media (WhatsApp groups, Facebook) for information, including around the vaccination  
47 programme<sup>34</sup>. One study of international migrants in China (94.5% of whom preferred social media for news  
48 about COVID-19) had lower rates of correct knowledge about COVID-19 compared to rates reported for Chinese  
49  
50  
51  
52  
53  
54  
55  
56  
57  
58  
59  
60



1 residents<sup>45</sup>. The authors speculate that this might be due to a lack of available public health information in a  
2 range of languages.  
3  
4

5  
6 Other studies showed positive associations with use of social media and access to information. One study  
7 highlighted that social media can support migrants to navigate the complex medicolegal context of their host  
8 countries by accessing information about public health measures and how to access medical help<sup>37</sup>. Social media  
9 use was associated with improved knowledge about COVID-19 and how to stay safe, in studies of Syrian refugee  
10 mothers<sup>46</sup> and US Latinos<sup>41</sup>. In another study specifically curated, culturally relevant digital content was  
11 considered to be an effective health promotion tool to share knowledge about practical actions to be taken to  
12 address the inequitable impact of the pandemic on US Latinos<sup>41</sup>.  
13  
14  
15  
16  
17  
18  
19  
20  
21

## 22 Misinformation and social media use

23  
24 A summary of some of the key misinformation narratives identified in studies are provided in Table 3. Some  
25 studies made links between social media and circulating misinformation in migrant and ethnic minority groups.  
26 For example, a UK cohort study found that both belonging to an ethnic minority group and socioeconomic  
27 disadvantage was associated with both exposure to misinformation about vaccines, and mistrust in information  
28 about COVID-19<sup>30</sup>. A study of Syrian refugee mothers in Jordan, who reported receiving most of their COVID-19  
29 information through social media, identified some erroneous beliefs about pregnancy, COVID-19 and breast  
30 milk<sup>46</sup>. A UK study among ethnic minority groups reported that participants encountered a range of  
31 misinformation, usually through social media sources and that vaccine hesitancy could be attributed to safety  
32 concerns, negative stories and personal knowledge, all of which had been amplified by recent exposure to  
33 misinformation via social media<sup>29</sup>. Myths identified included the idea that health professionals at the local  
34 hospital were injecting people with COVID-19 or killing people with the COVID-19 vaccine; there were wider  
35 beliefs reported about vaccines containing a microchip; making people infertile, or that vaccines are being  
36 tested on ethnic minority individuals<sup>29</sup>. These participants described the dilemma of not knowing what to trust  
37 or who to listen to, including the videos /posts that appeared to be from trusted professionals; therefore, they  
38 could not entirely dismiss negative stories circulating via social media and elsewhere.  
39  
40  
41  
42  
43  
44  
45  
46  
47  
48  
49  
50  
51  
52  
53  
54  
55  
56  
57  
58  
59  
60



**Table 3: Examples of circulating misinformation on social media platforms relating to COVID-19 (2020), reproduced and compiled from Loomba et al<sup>35</sup> and Lockyer et al.<sup>29</sup>**

| Misinformation identified                                                                                                                                                                                                                                                                                                                                                                                                                                                                                                                                                                                                                                                                                                                                                                                                                                                                                                                                                                                                                                                                                                                                                                                                                                                                                                                                                               | Source                     | Engagement <sup>1</sup> | Reach <sup>2</sup> |
|-----------------------------------------------------------------------------------------------------------------------------------------------------------------------------------------------------------------------------------------------------------------------------------------------------------------------------------------------------------------------------------------------------------------------------------------------------------------------------------------------------------------------------------------------------------------------------------------------------------------------------------------------------------------------------------------------------------------------------------------------------------------------------------------------------------------------------------------------------------------------------------------------------------------------------------------------------------------------------------------------------------------------------------------------------------------------------------------------------------------------------------------------------------------------------------------------------------------------------------------------------------------------------------------------------------------------------------------------------------------------------------------|----------------------------|-------------------------|--------------------|
| "Scientists have expressed doubts over the effectiveness of a COVID-19 vaccine that has been rushed to human trials, after all the monkeys used in initial testing later contracted COVID-19."                                                                                                                                                                                                                                                                                                                                                                                                                                                                                                                                                                                                                                                                                                                                                                                                                                                                                                                                                                                                                                                                                                                                                                                          | Twitter                    | 1.59K                   | 1.5m               |
| "The new vaccine for COVID-19 will be the first of its kind EVER. It will be an mRNA vaccine which will literally alter your DNA. It will wrap itself into your system. You will essentially become a genetically modified human being"                                                                                                                                                                                                                                                                                                                                                                                                                                                                                                                                                                                                                                                                                                                                                                                                                                                                                                                                                                                                                                                                                                                                                 | Twitter                    | 27                      | 19.6K              |
| "They said it was just to flatten the curve. Now it's a battle for human survival." The only must-see action thriller for 2020. Starring: Bill Gates, Anthony Fauci, Chris Witty, Matt Hancock. Guest mask appearances: Clintons, Boris Johnson, Nicola Sturgeon, Joe Biden & Tedros. [Graphic featuring Mr. Bill Gates with the following quote.] "If we do a really good job with vaccines, we can reduce population by up to 15%. But if we create a worldwide pandemic first, killing people and making many of the survivors sterile, then create the vaccine, we may achieve the Georgia Guidestones 1st commandment!"                                                                                                                                                                                                                                                                                                                                                                                                                                                                                                                                                                                                                                                                                                                                                            | Twitter                    | 11                      | 1.49K              |
| Something is very fishy about all this indeed. "A VIRUS WITH A 99.6% SURVIVAL RATE FOR PEOPLE UNDER 70 BUT THE ENTIRE WORLD NEEDS TO TAKE A VACCINE? I'M NO SHERLOCK HOLMES BUT SOMETHING'S FISHY ABOUT ALL THAT....."                                                                                                                                                                                                                                                                                                                                                                                                                                                                                                                                                                                                                                                                                                                                                                                                                                                                                                                                                                                                                                                                                                                                                                  | Twitter                    | N/K <sup>2</sup>        | 32.5K              |
| "Big Pharma whistle-blower: '97% of corona vaccine recipients will become infertile'"                                                                                                                                                                                                                                                                                                                                                                                                                                                                                                                                                                                                                                                                                                                                                                                                                                                                                                                                                                                                                                                                                                                                                                                                                                                                                                   | Twitter                    | 6.95K                   | 336K               |
| "I've been in Twitter jail for the last 12 hours for posting a link to a peer reviewed scientific study published in Vaccine showing that in military personnel prior receipt of the flu shot increased COVID-19 risk by 36%. Censorship is vile & unAmerican."                                                                                                                                                                                                                                                                                                                                                                                                                                                                                                                                                                                                                                                                                                                                                                                                                                                                                                                                                                                                                                                                                                                         | Twitter                    | 25.1K                   | 1.41K              |
| "So we know for a fact that the flu vaccine worsens COVID-19 symptoms. So what are they mandating now? The flu vaccine, of course."                                                                                                                                                                                                                                                                                                                                                                                                                                                                                                                                                                                                                                                                                                                                                                                                                                                                                                                                                                                                                                                                                                                                                                                                                                                     | Facebook                   | NK                      | NK                 |
| "PREPARING THE PROPAGANDA BLITZ. Yale University and the U.S. government are running clinical trials to develop propaganda messaging to persuade Americans to take experimental, genetically engineered, unlicensed, "Warp Speed," zero liability, expedited vaccines with limited short duration safety testing. Researchers compared reactions in 12 focus groups using "guilt, embarrassment, bravery, anger, trust" and "fear" to overcome vaccines hesitancy"                                                                                                                                                                                                                                                                                                                                                                                                                                                                                                                                                                                                                                                                                                                                                                                                                                                                                                                      | Instagram                  | 28.2K                   | NK                 |
| <ul style="list-style-type: none"> <li>➤ COVID-19 is not real, it is an effort to control society</li> <li>➤ COVID-19 has been manufactured by China or other governments for control purposes</li> <li>➤ COVID-19 is caused by 5G</li> <li>➤ COVID-19 has been invented to make people use contactless payments so that the government can track individuals</li> <li>➤ COVID-19 testing gives so many false positives that it is ineffective and you should not self-isolate</li> <li>➤ COVID-19 exists but is not as virulent as the government says it is</li> <li>➤ If children test positive for COVID-19 during school hours, they can be taken away into care and will not be able to see their parents until they test negative</li> <li>➤ The COVID-19 vaccine contains a chip that will track individuals, stop them travelling etc</li> <li>➤ The COVID-19 vaccine will make people infertile and is an attempt to reduce the population, particularly targeted at people from BAME communities</li> <li>➤ BAME people are being used as 'guinea pigs' to test out the COVID-19 vaccine</li> <li>➤ The COVID-19 vaccine has been developed and approved too quickly and has not been fully tested</li> <li>➤ The COVID-19 vaccine will negatively disrupt your natural immune system</li> <li>➤ Herbal remedies will be more effective than the COVID-19 vaccine</li> </ul> | Multiple platforms/unknown | NK                      | NK                 |

1 Engagement measures the number of likes and retweets.

2 Reach measures the number of followers and thus potential audience size.

NK=Not known.

1  
2 In a study of 60 Latinx adults hospitalised for COVID-19 in the US, many participants reported that they relied  
3 on social media for COVID-19 recommendations and described a lack of information and circulating  
4 misinformation, with suspicion of the government and immigration departments was a common misinformation  
5 theme: “some of us see [COVID] as a tactic for the government to access our documentation status and deport  
6 us”<sup>39</sup>. One Mexican male (age 45) in one US study<sup>42</sup> noted: “When someone uploads something to Facebook  
7 then no-one believes in it 100%”; a Mexican female (age 33) was also quoted as saying “[I get my information]  
8 well through the news, TV, Facebook and all of that...not everything I see is credible”.

9  
10  
11  
12  
13  
14  
15  
16  
17 In a UK qualitative study<sup>29</sup>, participants who initially disregarded conspiratorial beliefs found it challenging to  
18 maintain their confidence that the rumours were untrue due to a number of factors: (i) receiving many social  
19 media messages about them; (ii) receiving messages about them from trusted others; (iii) feeling anxious; and  
20 (iv) being under lockdown conditions at home. Participants expressed confusion about which story to trust, and  
21 ongoing difficulty identifying information as misinformation and dismissing it. Similarly, another study<sup>40</sup>  
22 reported that 79% of female Black Americans interviewed stated that they were confused by the COVID-19  
23 information they’d accessed from any source: “Sometimes I feel unsure about the information that I’m receiving  
24 because it's a lot of different things about it. Everybody's not saying the same thing. So, I’m kind of unsure about  
25 what to believe”.<sup>40</sup>

## 35 Social media impact on preventative health measures and vaccine intent

36  
37 A small number of studies linked social media use with lower participation in preventative measures among  
38 migrants and ethnic minority groups. A UK/US survey study found vaccine hesitancy to be associated with  
39 informational reliance on social media and membership of an ethnic minority group<sup>31</sup>. A UK qualitative study  
40 reported that ethnic minority groups were influenced by anti-vaccine misinformation, including from social  
41 media.<sup>29</sup> A UK qualitative study of precarious migrants found that among 23 participants who were hesitant  
42 about receiving a vaccine some participants described fears around theories based on misinformation, often  
43 originating from social media or word of mouth, with many describing feeling conflicted about which  
44 information sources to trust<sup>34</sup>. Community leaders from African, Caribbean, Asian and Eastern Mediterranean  
45 migrant groups in London, UK reported substantial COVID-19 vaccine hesitancy due to misinformation  
46 circulating on social media and word of mouth combined with a lack of accurate, translated and clear guidance<sup>32</sup>.  
47 Similarly, in a US qualitative study of Latino adults, some participants reported encountering a lack of knowledge  
48 accompanied by misinformation on social media causing them to dismiss preventative measures<sup>39</sup>. Another US  
49  
50  
51  
52  
53  
54  
55  
56  
57  
58  
59

1 study among Latino people reported that social media acted as a potential deterrent for following some public  
2 health measures to prevent infection by encouraging rule-breaking behaviour through socially normalising such  
3 behaviour by enabling people to observe the negative, guideline-breaking behaviours of others in social media  
4 posts<sup>42</sup>.  
5  
6  
7

8  
9 On the other hand, a large (8,001 participants) US/UK randomised controlled experiment<sup>35</sup> found no significant  
10 differences in the response of different ethnic groups to misinformation in relation to vaccine intent. A large  
11 US/UK study<sup>36</sup> found membership of an ethnic minority group was associated with reduced vaccine intention, a  
12 relationship which was significant in three out of four studies ( $p < 0.001$ ,  $n = 3890$ ;  $p = 0.017$ ,  $n = 1663$ ;  $p < 0.001$ ,  
13  $n = 2237$ ). The relationship persisted even when use of legacy (print and broadcast media) and frequency of use  
14 of social media was controlled for. High levels of social media use was not associated with vaccine intent in any  
15 of the three studies exploring this relationship; however, high information reliance on social media was  
16 significantly associated with negative vaccine intent ( $p = 0.028$ ,  $n = 2237$ ), suggesting a reliance on social media  
17 for information can make users vulnerable to misinformation. This study did not include interaction terms  
18 between ethnicity and information reliance on social media, which could have indicated whether the effect of  
19 information reliance on social media on vaccine intent differs by ethnicity.  
20  
21  
22  
23  
24  
25  
26  
27  
28  
29

### 30 31 32 Good practice in promoting information and countering misinformation

33 Evidence suggests the important role of strong connections with the local community to identify and counter  
34 misinformation and rumours by trusted and valued sources of information. Most studies recommended  
35 improving the accessibility of public health information for migrant and ethnic minority communities.<sup>30 32 37 39 40</sup>  
36  
37  
38  
39  
40  
41  
42  
43  
44  
45  
46  
47  
48  
49  
50  
51  
52  
53  
54  
55  
56  
57  
58  
59  
60  
42-45 49 For example, providing public health information in the media channel preferred by that group<sup>39</sup>, in  
multiple languages<sup>29</sup>, and using local, trusted voices delivering specific and targeted messages to counter fake  
news<sup>29 39</sup>. A strong interest in online, personalised information was identified<sup>41 42</sup>. Where social media was used  
to share personalised and culturally tailored public health information, it has a positive influence with good  
health knowledge, health seeking behaviours and vaccine intent<sup>29-32 37 39-41 43-46 49</sup>. Studies indicated the need for  
culturally tailored health messaging to ensure equitable health knowledge for improving vaccine intent and  
health seeking behaviours<sup>32 39-41</sup>.

More personalised means of health information communication was highlighted as a demand for informational  
reliance. A national US organisation which provides online health information tailored to the US Latino  
community found a high level of interest in their COVID-19 curated content, suggesting a strong demand for

1 tailored and culturally relevant material<sup>41</sup>. In a new approach, 'virtual patient navigators', helpers working  
2 online, typically using messages to provide individually tailored health information, were made available to  
3 Latino migrants through a New York-based communication platform<sup>37</sup>.

4  
5  
6  
7 Working through trusted sources was also emphasised. Providing accurate and tailored information about  
8 COVID-19 via trusted community members and organizations was suggested in a study of Black women aged  
9 19-31 years in the US<sup>40</sup>. The study recommended that health professionals take an active role collaborating with  
10 the community to address inequities that Black women are experiencing in the pandemic<sup>40</sup>. Participants in a  
11 randomised controlled study to explore the impact of misinformation on vaccine intent on different populations  
12 groups reported finding videos on social media very engaging, especially when delivered in multiple languages  
13 by someone in a trusted profession (e.g., doctor/teacher/nurse)<sup>35</sup>.

14  
15  
16  
17 Successful countering myths was reported in a UK study wherein the local council rapidly responded to fake  
18 news circulating in the local population (e.g., a rumour about children who test positive in school for COVID-19  
19 being removed from the school and/or their parents until they test clear)<sup>29</sup>. Videos to refute the myth were  
20 swiftly posted online in both Urdu and Punjabi, and these were reported to be effective by members of the local  
21 population<sup>29</sup>. Additional studies report successfully countering misinformation using a network of patient  
22 navigators<sup>37</sup> and community household surveys<sup>29</sup>. Social media use to communicate with family was also  
23 reported to be effective in challenging COVID-19 denial misinformation rumours through reporting of lived  
24 experience of COVID-19<sup>39</sup>.

## 40 Discussion

41  
42  
43  
44 Among migrant and ethnic minority populations in the UK, US, China, Jordan, Qatar, and Turkey we found  
45 evidence of consistent use of social media for COVID-19 information, including via WeChat, Facebook,  
46 WhatsApp, Instagram, Twitter, YouTube, which may stem from a difficulty in accessing COVID-19 information in  
47 their native languages or from sources they trusted. There was some evidence of circulating misinformation and  
48 social media use associated with lower participation in preventative health measures, especially vaccination  
49 intent, and finding that will be undoubtedly generalisable to multiple population groups. This is a rapidly  
50 evolving field of research, and data are limited, but our work highlights the considerable importance of social  
51 media platforms as a source of information and misinformation about COVID-19 for some migrant and ethnic  
52

1 minority populations during the pandemic. Whilst we know social media is used by many people, and  
2 misinformation has been circulating widely in the general population, it may be the case that those excluded  
3 from national public health responses and/or who faced specific barriers to accurate public health information  
4 and support may have been disproportionately impacted. Urgent actions and further research are now needed  
5 to better understand use of social media platforms for health information in different population groups, find  
6 effective approaches to tackling misinformation, and to seize on opportunities to make better use of social  
7 media platforms to support public health communication and improve vaccine uptake globally. Furthermore,  
8 the findings highlight the crucial role of locally trusted sources in identifying and tackling misinformation, and  
9 underscores the benefits of disseminating personalised and culturally relevant health messages, including via  
10 social media.  
11  
12  
13  
14  
15  
16  
17  
18  
19  
20  
21

22 This review is the first attempt to synthesise global studies exploring the use and impact of social media on  
23 migrant and ethnic minority populations during the COVID-19 pandemic. However, it is limited by the availability  
24 and quality of the datasets available. We acknowledge the limited geographical scope of included studies, with  
25 16 of 21 studies focused on migrant and ethnic minority populations residing in the UK and US and no data at  
26 all from low-income countries. It may be that the lower availability of research funding in low-income countries  
27 may explain the lack of studies from these countries. We acknowledge that definitions and terms pertaining to  
28 migrants and ethnic minorities and social media are used inconsistently in research; this is an ongoing challenge  
29 within the field, which has previously been evidenced in similar reviews, and may mean we have missed papers.  
30 This was mitigated against by searching the published and grey literature more widely. We also acknowledge  
31 that as many of the surveys didn't formally report whether the social media feeds their responders were  
32 following were from 'official' sources, such as government or non-governmental organisations or from  
33 'unofficial' sources, such as friends, relatives, or accounts simply with many followers, though the included  
34 datasets and further qualitative work our groups is currently doing in the UK suggest they will be predominantly  
35 unofficial sources, with government public health teams in several countries very slow to make effective use  
36 social media as a platform of communication at the start of the pandemic. A further limitation is that there were  
37 insufficient studies to reliably compare use of social media across type of migrants (refugees/asylum seeker,  
38 undocumented migrants), and future research should explore this. We acknowledge that migrants and ethnic  
39 minorities are a highly diverse group with a range of health and socioeconomic situations making it hard to  
40 generalise; however there is evidence in several contexts that these populations may have been  
41 disproportionately impacted by the COVID-19 pandemic<sup>14 17 50</sup>.  
42  
43  
44  
45  
46  
47  
48  
49  
50  
51  
52  
53  
54  
55  
56  
57  
58  
59  
60

1  
2 The findings of our review have been confirmed by more recent studies. For example, a survey of migrants in  
3 Greece found their main source of information about the vaccine was via social media platforms and the internet  
4 in general, and that vaccine hesitancy was linked to a lack of adequate information and driven by fear, anxiety,  
5 exposure to negative news and misinformation.<sup>51 52</sup> In Turkey, a 2021 survey and feedback mechanism in  
6 refugee communities found information gaps, misconceptions, and rumours about COVID-19 vaccines  
7 circulating mainly by word of mouth and on social media, undermining health information<sup>53</sup>. In a recent study  
8 of Venezuelan migrants in Latin America, 70% said they had access to a mobile phone, with the main  
9 communication channels being WhatsApp and Facebook, yet half said they felt uninformed<sup>54</sup>. We also found  
10 that some migrants and ethnic minorities used diaspora media as a source of COVID-19 related information  
11 during the pandemic, which merits further consideration in terms of understanding how to better engage these  
12 groups in preventative health care and vaccination, and has been previously reported in studies as influencing  
13 views and beliefs around vaccination<sup>55</sup>. Misinformation on social media correlated negatively with vaccine  
14 intention and our findings align with other research in this area and will undoubtedly be relevant to many other  
15 population groups<sup>27 34</sup>. A recent study among migrants and nationals in Qatar acknowledged 'personal research'  
16 via social media as important to them for seeking information about COVID-19 vaccines, underlining the key  
17 role social media has in influencing people's attitudes towards vaccine uptake<sup>56</sup>.

18  
19  
20  
21  
22  
23  
24  
25  
26  
27  
28  
29  
30  
31  
32  
33 The European Centre for Disease Prevention and Control (ECDC) and other public health bodies have raised  
34 concerns around barriers to public health information among migrant populations and ethnic minority groups  
35 residing in Europe and other high-income countries during the pandemic<sup>14 15</sup>. Public health guidance in some  
36 countries was not initially tailored to the needs of migrant and ethnic minority groups<sup>19 57-59</sup>. A review of the  
37 availability of government produced risk communications across Council of Europe member states in June 2021  
38 found only 48% (23/47) of countries translated COVID-19 information into at least one migrant language, with  
39 information on testing or healthcare entitlements in common migrant languages only found in 6% (3/47),  
40 suggesting individuals not able to access information in the host country language may have been excluded to  
41 some extent from governments' public health messaging<sup>19</sup>. In Denmark, a series of qualitative interviews with  
42 migrants found that they felt uncertain regarding government guidance for COVID-19; although written material  
43 was translated into 19 languages, it was not effectively disseminated<sup>60</sup>. In Montreal, Canada, there were delays  
44 to publishing official multilingual fact sheets on COVID-19 guidelines, and information phone lines only operate  
45 in French and English; those who had arrived most recently, had lower language (French/English) ability or lower  
46 literacy had more difficulty accessing local COVID-19 information<sup>61</sup>. Lack of English or French language at the



1 time of immigration to Canada were associated with lower rates of testing and higher percent positivity for  
2 COVID-19 in recently arrived adult immigrants and refugees<sup>62</sup>. A study among refugees and migrants in deprived  
3 areas in Greece found that migrants may have difficulties understanding public health messaging due to cultural  
4 and language barriers.<sup>19 58 63</sup> Merely translating public health information is not likely to be sufficient;  
5 information needs to be tailored and targeted so it is conveyed in ways that resonate with the target population.  
6 A range of key resources and guidelines on risk communication and engagement strategies for COVID-19 public  
7 health responses, including vaccination, among marginalised populations globally are available, as well as a  
8 social media toolkit for healthcare practitioners ([https://www.who.int/publications/m/item/a-social-media-  
9 toolkit-for-healthcare-practitioners---desktop](https://www.who.int/publications/m/item/a-social-media-toolkit-for-healthcare-practitioners---desktop))<sup>64-66</sup>. However, it will be vitally important that the lessons learned  
10 around communication of public health information to marginalised groups during the pandemic are  
11 meaningfully carried forward.  
12  
13  
14  
15  
16  
17  
18  
19  
20  
21

22 Where social media is used to share personalised and culturally tailored public health information, it has a  
23 positive correlation with good health knowledge, health seeking behaviours and vaccine intent<sup>41 46</sup>. Our research  
24 shows the need for culturally tailored health messaging to ensure equitable health knowledge and to improve  
25 vaccine uptake, by accurate public health messaging through trusted sources of information<sup>32 39-41</sup>. We make a  
26 number of recommendations for policy and practice, which include the need for systematic monitoring of  
27 information and attitudes circulating on social media<sup>67</sup>, as well as timely rebuttal of misinformation from trusted  
28 professionals (see box 1). Several resources are now available to support addressing misinformation about  
29 COVID-19 vaccines as well as fostering demand for vaccines.<sup>68-70</sup>  
30  
31  
32  
33  
34  
35  
36  
37  
38

39 There is a stark lack of data on social media use from low and middle-income countries, which merits greater  
40 consideration as COVID-19 vaccination gathers pace in these contexts. Studies from high income countries are  
41 also limited, with the majority of studies focused on the USA and UK. In addition, more evidence is needed to  
42 examine the role social media platforms play in positively or negatively influencing health behaviours such as  
43 vaccine intent and uptake for COVID-19 in all populations (including other excluded groups eg, homeless,  
44 internally displaced people/IDPs). Social media is an important source of health information for some migrant  
45 and ethnic minority communities and tackling misinformation needs to be done using this medium given the  
46 lack of trust in government messaging in some of these communities<sup>71</sup>. Our findings are consistent with those  
47 of others working in this field, which show that social media can have a crucial role in disseminating health  
48 information, tackling infodemics and misinformation<sup>4</sup>. There is an opportunity now to more effectively use social  
49 media to make vaccine intent desirable, appealing and normative among migrants and ethnic minority groups.  
50  
51  
52  
53  
54  
55  
56  
57  
58  
59

1 There is an urgent need to address infodemic-related challenges in a rapidly changing information environment,  
2 including real-time monitoring of social media messages and misinformation and the development of online  
3 tools to fight disinformation, with a focus on collecting stratified population data to enable targeted and tailored  
4 responses. Robust interventions relying on behavioural science to tackle misinformation using social media and  
5 evaluations are a plausible next step to address immunisation challenges for COVID-19 vaccines but also routine  
6 vaccines. Building trust in public health messaging, identifying information gaps, finding innovative ways of  
7 disseminating health information, and detecting and responding to misinformation as it emerges remain a  
8 priority for public health<sup>71 72</sup>.

### 18 **Box 1: Key messages and recommendations**

- 21 • Social media is an important source of health information for some migrant and  
22 ethnic minority communities, who may face barriers to accurate public health  
23 information, health, and vaccinations systems. More evidence is urgently needed to  
24 examine the role social media platforms play in positively or negatively influencing  
25 health behaviours such as vaccine intent and uptake for COVID-19 in marginalised  
26 populations.
- 27 • There is a stark lack of data on social media use from low and middle-income  
28 countries which merits greater consideration as COVID-19 vaccination gathers pace in  
29 these contexts.
- 30 • More emphasis must be placed on exploring opportunities for sharing and  
31 transmitting accurate information via social media platforms, for example, to make  
32 vaccine intent desirable, appealing and normative.
- 33 • Use of diaspora media by migrant populations, as a source of COVID-19 related  
34 information during the pandemic and for other health information, merits further  
35 research and greater consideration when designing and delivering public health  
36 interventions.
- 37 • Proactively monitor social media platforms and other media sources to identify anti-  
38 vaccine sentiment, misinformation, fake news, and rumours, and address them in  
39 real-time.
- 40 • There is a need to promote targeted and tailored health information to marginalised  
41 populations who face access barriers to health and vaccination systems, through  
42 preferred and trusted sources and channels of information including social media  
43 platforms, and to ensure investment in workforce and infrastructure to support this.



- Engage with and involve communities in developing culturally specific messages and approaches, and support community-driven initiatives to identify at-risk groups, map local influencers, and define content for locally meaningful communication campaigns. Facilitate partnership working at the local level through involvement of diverse stakeholders and ensure community partners are recognised and reimbursed for their contributions and expertise.
- Social media platforms should exercise more accountability and sign pledges to systematically track and remove harmful content that undermine public health measures, particularly during a public health crisis. The public must be empowered to identify and flag misinformation on social media
- Public health bodies and healthcare professionals should avoid a narrow focus on misinformation and a one-way communication of 'more accurate' information. They should seek to understand the underlying causes of exposure to and belief in misinformation including genuine knowledge void, access barriers and health literacy.
- Lessons must be learned around shortfalls in the communication of public health information to marginalised groups during this pandemic. Importantly, countries should gather and evaluate innovations and models of best practice in this area, which must be meaningfully carried forward to strengthen uptake of routine vaccinations and other public health interventions.

## Conflicts of Interests

All authors report nothing to declare.

## Data availability statement

All data used in the systematic review are appropriately referenced and available online in the sources cited.

## Ethics statements

Not applicable.

## Patient consent for publication

Not applicable.

## Funding and acknowledgements

1 This study was funded by the National Institute for Health Research (NIHR300072) and Academy of Medical  
2 Sciences (SBF005\1111). LPG, SH, and AFC are funded by the NIHR (NIHR300072); AFC and SH are funded by the  
3 Academy of Medical Sciences (SBF005\1111). SH acknowledges funding from the Novo Nordisk Foundation  
4 (Mobility– Global Medicine and Health Research) and the World Health Organization. AD and SEH are funded  
5 by the Medical Research Council (MRC/N013638/1). KR is funded by the Rosetrees Trust (M775). MR is funded  
6 by an NIHR In-Practice Clinical Fellowship (NIHR 302007). JC is funded by an NIHR In-Practice Clinical Fellowship  
7 (NIHR300290). The views expressed are those of the author(s) and not necessarily those of the NHS, the NIHR,  
8 or the Department of Health and Social Care. The funder of the study had no role in study design, data collection,  
9 data analysis, data interpretation, or writing of the report.  
10  
11  
12  
13  
14  
15  
16  
17

## 18 **Author Contributions**

19 The study was conceptualised by SH, and the protocol and research question were developed by SH, LPG and  
20 MRP. Searches were developed by MRP and LG, with input from SH and SEH. Screening was done by LPG and  
21 MRP. Data extraction and analysis was done by LPG and MRP, with input from SH. The first draft of the  
22 manuscript was produced by LG, MRP, and SH, and developed with KH and TV, who all contributed to  
23 interpretation of the results. All authors, including AD, AFC, SEH, FK, JC, AA and MR commented upon and  
24 approved the final manuscript. SH is guarantor of this study.  
25  
26  
27  
28  
29  
30  
31  
32

## 33 **Disclaimer**

34 The views expressed are those of the author(s) and not necessarily those of the NHS, the NIHR, or the  
35 Department of Health and Social Care. The funder of the study had no role in study design, data collection, data  
36 analysis, data interpretation, or writing of the report.  
37  
38  
39  
40  
41  
42

43 **Competing interests** None declared.  
44  
45  
46

## 47 **Figure 1: PRISMA Diagram**

## 48 **Figure 2: Data on use of social media platforms as a source of information about COVID-19**

## 49 **References**

50  
51  
52  
53  
54  
55  
56  
57  
58 1. WHO. Health topics/Infodemic. Available from: [https://www.who.int/health-topics/infodemic#tab=tab\\_1](https://www.who.int/health-topics/infodemic#tab=tab_1).  
59  
60

2. N. Puri, et al. Social media and vaccine hesitancy: new updates for the era of COVID-19 and globalized infectious diseases. *Human Vaccines & Immunotherapeutics*, 16 (11) (2020), pp. 2586-2593.
3. H. Oi-Yee Li, et al. YouTube as a source of information on COVID-19: a pandemic of misinformation? *BMJ Global Health*, 5 (2020).
4. Tsaie S-F, et al. What social media told us in the time of COVID-19: as scoping reviews. *Lancet Digit Health* 2021; 3:e175-94. .
5. C.H. Basch, et al. What do popular YouTube videos say about vaccines? *Child Care Health Dev*, 43 (4) (2017), pp. 499-503.
6. Larson, Heidi J. "The biggest pandemic risk? Viral misinformation." *Nature*, vol. 562, no. 7726, Oct. 2018, p. 309. Gale Academic OneFile, [link.gale.com/apps/doc/A573035610/AONE?u=anon~d201a883&sid=googleScholar&xid=01fdad7a](https://link.gale.com/apps/doc/A573035610/AONE?u=anon~d201a883&sid=googleScholar&xid=01fdad7a). .
7. Wilson SL, Wiysonge C. Social media and vaccine hesitancy. *BMJ Global Health* 2020; 5 (10) <https://gh.bmj.com/content/5/10/e004206>.
8. Roozenbeek J, Schneider CR, Dryhurst S, et al. Susceptibility to misinformation about COVID-19 around the world. *Royal Society Open Science* 2020;7(10):201199. doi: 10.1098/rsos.201199.
9. Statista. <https://www.statista.com> 2021 [cited 2021 17th Sept 2021]. Available from: <https://www.statista.com> accessed 17th Sept 2021 2021.
10. American Press Institute. Race, Ethnicity, and the Use of Social Media for News. *How Millennials Use Technology to Get News* 2015. <https://www.americanpressinstitute.org/publications/reports/survey-research/race-ethnicity-social-media-news/>.
11. Gorman D, Bielecki K, Willocks L, Pollock K. A qualitative study of vaccination behaviour amongst female Polish migrants in Edinburgh, Scotland. *Vaccine*. 2019;37(20):2741-7.
12. World Health Organization. 10 global health issues to track in 2021. *Spotlight*. <https://www.who.int/news-room/spotlight/10-global-health-issues-to-track-in-2021>.
13. Cinelli M, Quattrocioni W, Galeazzi A, et al. The COVID-19 social media infodemic. *Scientific Reports* 2020;10(1):16598. doi: 10.1038/s41598-020-73510-5
14. Hayward SE, Deal A, Cheng C, et al. Clinical outcomes and risk factors for COVID-19 among migrant populations in high-income countries: A systematic review. *Journal of Migration and Health* 2021;3:100041. doi: <https://doi.org/10.1016/j.jmh.2021.100041>
15. ECDC. Reducing COVID-19 transmission and strengthening vaccine uptake among migrant populations in the EU/EEA. Technical Report. ECDC: Stockholm, 2021. .
16. Khanijahani A, Iezadi S, Gholipour K, et al. A systematic review of racial/ethnic and socioeconomic disparities in COVID-19. *International Journal for Equity in Health* 2021;20(1):248. doi: 10.1186/s12939-021-01582-4
17. Hargreaves S, Hayward S, Noori T, McKee M, Kumar B. COVID-19: Counting migrants in. *Lancet* 2021; 398. .
18. Turkish Red Crescent Society CCs, Fatma Nur Bakkalbaşı, Onurcan Ceyhan, Tenadi Gölemez. COVID-19 Rumour Tracking Report: Turkish Red Crescent Society (TRCS) in Collaboration with International Federation of Red Cross and Red Crescent Societies (IFRC), 2021.
19. Maldonado BMN, et al. Engaging the vulnerable: a rapid review of public health communication aimed at migrants during the COVID-19 pandemic in Europe *J Migr Health* 2020; 1:100004. <https://pubmed.ncbi.nlm.nih.gov/33447830/>.
20. Rowland-Pomp M, Hargreaves S, Goldsmith LP, et al. The impact of social media and misinformation on migrant and ethnic minorities populations and their response to the COVID-19 pandemic: a systematic review. PROSPERO 2021 CRD42021259190, 2021.
21. Page MJ, McKenzie JE, Bossuyt PM, et al. The PRISMA 2020 statement: an updated guideline for reporting systematic reviews. *BMJ* 2021;372:n71. doi: 10.1136/bmj.n71
22. Organisation. WH. Archived: WHO Timeline - COVID-19. In: Organisation. WH, ed., 2020.

23. World Health Organization. COVID-19 Global literature on coronavirus disease database  
<https://www.who.int/emergencies/diseases/novel-coronavirus-2019/global-research-on-novel-coronavirus-2019-ncov>.
24. Ouzzani M, Hammady H, Fedorowicz Z, et al. Rayyan—a web and mobile app for systematic reviews. *Systematic reviews* 2016;5(1):1-10. doi: 10.1186/s13643-016-0384-4
25. Protogerou C, Hagger MS. A checklist to assess the quality of survey studies in psychology. *Methods in Psychology* 2020;3 doi: 10.1016/j.metip.2020.100031
26. Critical Appraisal Skills Programme. CASP Qualitative Checklist. 2018 doi: <https://casp-uk.net/casp-tools-checklists/>
27. Pluye P, Hong QN. Combining the power of stories and the power of numbers: mixed methods research and mixed studies reviews. *Annu Rev Public Health* 2014;35:29-45. doi: 10.1146/annurev-publhealth-032013-182440 [published Online First: 20131030]
28. Lisy K, Porritt K. Narrative Synthesis: Considerations and challenges. *JBI Evidence Implementation* 2016;14(4):201. doi: 10.1097/01.XEB.0000511348.97198.8c
29. Lockyer I, Rahman, Dickerson, Pickett, Sheldon, Wright, McEachan, Sheard. Understanding Covid-19 misinformation and vaccine hesitancy in context: Findings from a qualitative study involving citizens in Bradford, UK, 2020.
30. Paul E, Steptoe A, Fancourt D. Attitudes towards vaccines and intention to vaccinate against COVID-19: Implications for public health communications. *The Lancet Regional Health Europe* 2021;1:100012-12. doi: [10.1016/j.lanepe.2020.100012](https://doi.org/10.1016/j.lanepe.2020.100012)
31. Allington(a) D, McAndrew S, Moxham-Hall V, et al. Coronavirus conspiracy suspicions, general vaccine attitudes, trust and coronavirus information source as predictors of vaccine hesitancy among UK residents during the COVID-19 pandemic. *Psychol Med* 2021;1-12. doi: [10.1017/S0033291721001434](https://doi.org/10.1017/S0033291721001434)
32. Crawshaw AF, Deal A, Rustage K, et al. What must be done to tackle vaccine hesitancy and barriers to COVID-19 vaccination in migrants? *J Travel Med* 2021;28(4):taab048. doi: 10.1093/jtm/taab048
33. Vekemans T. Crisis and Continuation: The Digital Relocation of Jain Socio-Religious Praxis during the COVID-19 Pandemic. *Religions* 2021;12(5):342-42. doi: [10.3390/rel12050342](https://doi.org/10.3390/rel12050342)
34. Deal A et al. Strategies and action points to ensure equitable uptake of COVID-19 vaccinations: a national qualitative interview study to explore the views of undocumented migrants, asylum seekers, and refugees. *J Migr Health* 2021; 4: 100050. .
35. Loomba S, de Figueiredo A, Piatek SJ, et al. Measuring the impact of COVID-19 vaccine misinformation on vaccination intent in the UK and USA. *Nature Human Behaviour* 2021;5(3):337-48. doi: 10.1038/s41562-021-01056-1
36. Allington(b) D, McAndrew S, Moxham-Hall VL, et al. Media usage predicts intention to be vaccinated against SARS-CoV-2 in the US and the UK. *Vaccine* 2021;39(18):2595-603. doi: [10.1016/j.vaccine.2021.02.054](https://doi.org/10.1016/j.vaccine.2021.02.054)
37. Behbahani S, Smith CA, Carvalho M, et al. Vulnerable Immigrant Populations in the New York Metropolitan Area and COVID-19: Lessons Learned in the Epicenter of the Crisis. *Acad Med* 2020;95(12):1827-30. doi: 10.1097/ACM.0000000000003518
38. Campos-Castillo C, Laestadius LI. Racial and Ethnic Digital Divides in Posting COVID-19 Content on Social Media Among US Adults: Secondary Survey Analysis. *J Med Internet Res* 2020;22(7):e20472-e72. doi: [10.2196/20472](https://doi.org/10.2196/20472)
39. Cervantes L, Martin M, Frank MG, et al. Experiences of Latinx Individuals Hospitalized for COVID-19: A Qualitative Study. *JAMA Netw Open* 2021;4(3):e210684-e84. doi: [10.1001/jamanetworkopen.2021.0684](https://doi.org/10.1001/jamanetworkopen.2021.0684)
40. Chandler R, Guillaume D, Parker AG, et al. The impact of COVID-19 among Black women: evaluating perspectives and sources of information. *Ethn Health* 2020:1-14. doi: [10.1080/13557858.2020.1841120](https://doi.org/10.1080/13557858.2020.1841120)

- 1  
2  
3  
4  
5  
6  
7  
8  
9  
10  
11  
12  
13  
14  
15  
16  
17  
18  
19  
20  
21  
22  
23  
24  
25  
26  
27  
28  
29  
30  
31  
32  
33  
34  
35  
36  
37  
38  
39  
40  
41  
42  
43  
44  
45  
46  
47  
48  
49  
50  
51  
52  
53  
54  
55  
56  
57  
58  
59  
60
41. Despres C, Aguilar R, McAlister A, et al. Communication for Awareness and Action on Inequitable Impacts of COVID-19 on Latinos. *Health Promot Pract* 2020;21(6):859-61. doi: [10.1177/1524839920950278](https://doi.org/10.1177/1524839920950278)
  42. Moyce S, Velazquez M, Claudio D, et al. Exploring a rural Latino community's perception of the COVID-19 pandemic. *Ethn Health* 2020:1-13. doi: [10.1080/13557858.2020.1838456](https://doi.org/10.1080/13557858.2020.1838456)
  43. Viswanath K, Bekalu M, Dhawan D, et al. Individual and social determinants of COVID-19 vaccine uptake. *BMC Public Health* 2021;21(1):818-18. doi: [10.1186/s12889-021-10862-1](https://doi.org/10.1186/s12889-021-10862-1)
  44. Woko C, Siegel L, Hornik R. An Investigation of Low COVID-19 Vaccination Intentions among Black Americans: The Role of Behavioral Beliefs and Trust in COVID-19 Information Sources. *J Health Commun* 2020;25(10):819-26. doi: [10.1080/10810730.2020.1864521](https://doi.org/10.1080/10810730.2020.1864521)
  45. Wang C, Tian Q, Zhao P, et al. Disease knowledge and attitudes during the COVID-19 epidemic among international migrants in China: a national cross-sectional study. *Int J Biol Sci* 2020;16(15):2895-905. doi: [10.7150/ijbs.47075](https://doi.org/10.7150/ijbs.47075)
  46. Hamadneh S, Hamadneh J, Amarin Z, et al. Knowledge and attitudes regarding Covid-19 among syrian refugee women in Jordan. *Int J Clin Pract* 2021;75(5):e14021-e21. doi: [10.1111/ijcp.14021](https://doi.org/10.1111/ijcp.14021)
  47. Alabdulla M, Reagu SM, Al-Khal A, et al. COVID-19 vaccine hesitancy and attitudes in Qatar: A national cross-sectional survey of a migrant-majority population. *Influenza Other Respir Viruses* 2021;15(3):361-70. doi: [10.1111/irv.12847](https://doi.org/10.1111/irv.12847)
  48. Danish Refugee Council. COVID-19 Impact on Refugees in South East Turkey. 2020 doi: <https://data2.unhcr.org/en/needs-assessment/1432>
  49. (R4V) RI-aCP. Information and communication needs assessment - U-Report Uniendo Voces Regional Poll, 2021.
  50. Buikema AR, et al. Racial and ethnic disparity in clinical outcomes among patients with confirmed COVID-19 infection in a large US electronic health record database. *Lancet EclinMed* 2021; Sept 101075. .
  51. Hellenic Red Cross. CEA. Survey on the migrant's population informatio needs, regarding health issues (COVID-19) <https://communityengagementhub.org/resource/survey-on-the-migrants-population-information-needs-regarding-health-issues-covid-19/>.
  52. Hellenic Red Cross. Perceptions survey on Covid-19 vaccination, Greece. <https://communityengagementhub.org/resource/perceptions-survey-on-covid-19-vaccination-greece/>.
  53. COVID-19 rumour tracking report. Ankara: Turkish Red Crescent Society; 2021 (<https://communityengagementhub.org/wp-content/uploads/sites/2/2021/10/Rumour-tracking-report-2021.pdf>, accessed 11 January 2022).
  54. Only half of refugees and migrants from Venezuela feel informed, survey finds. Panama City: Coordination Platform for Refugees and Migrants from Venezuela; 2020 (<https://www.r4v.info/sites/default/files/2021-06/CWC%20EN.pdf>, , accessed 11 January 2022).
  55. Ganczak M, Bielecki K, Drozd-Dabrowska M, Topczewska K, Biesiada D, Molas-Biesiada A et al. Vaccination concerns, beliefs and practices among Ukrainian migrants in Poland: a qualitative study. *BMC Public Health*. 2021;21 (1):93. doi: [10.1186/s12889-020-10105-9](https://doi.org/10.1186/s12889-020-10105-9).
  56. Alabdulla M, Reagu SM, Al-Khal A, Elzain M, Jones RM. COVID-19 vaccine hesitancy and attitudes in Qatar: A national cross-sectional survey of a migrant-majority population. *Influenza Other Respir Viruses*. 2021;15(3):361-70.
  57. Patel P, Hiam L, Orcutt M, Burns R, Devakumar D, Aldridge R, et al. Policy brief: Including migrants and refugees in the British government's response to COVID-19. 2020.
  58. Doctors of the World. An Unsafe Distance: The Impact of the COVID-19 Pandemic on Excluded People in England. 2020.
  59. Kondilis E, Papamichail D, McVann, Carruthers E, Veizis A, Orcutt M, Hargreaves S. The impact of the COVID-19 pandemic on refugees and asylum seekers in Greece: a retrospective analysis of national surveillance data, 2020. *Lancet EclinMed* 2021; 37: 100958: <https://doi.org/10.1016/j.eclinm.2021.100958>.



60. Institut for Menneskerettigheder. Corona rammer skævt - etnicitet og smitte. Copenhagen, Denmark; 2020.
61. Cleveland, J , Hanley, J , Jaimes, A , Wolofsky, T. , 2020. Impacts de la crise de la COVID-19 sur les «communautés culturelles »montréalaises: Enquête sur les facteurs sociocul- turels et structurels affectant les groupes vulnérables. Montréal: Institut universitaire SHERPA .
62. Guttman, A , Gandhi, S , Wanigaratne, S , Lu, H , Ferreira-Legere, L , Paul, J , et al. , 2020. COVID-19 in Immigrants, Refugees and Other Newcomers in Ontario: Characteristics of Those Tested and Those Confirmed Positive, as of June 13, 2020. ICES, Toronto, ON .
63. Cholera, R , Falusi, OO , Linton, JM. , 2020. Sheltering in place in a xenophobic climate: COVID-19 and children in immigrant families. Pediatrics 146 (1).
64. Conducting community engagement for COVID-19 vaccines: interim guidance, 31 January 2021. Geneva: World Health Organization; 2021 (<https://apps.who.int/iris/handle/10665/339451>, accessed 11 January 2022).
65. COVID-19 immunization in refugees and migrants: principles and key considerations: interim guidance, 31 August 2021. Geneva: World Health Organization; 2021 (<https://www.who.int/publications/i/item/covid-19-immunization-in-refugees-and-migrants-principles-and-key-considerations-interim-guidance-31-august-2021>).
66. Good practice guidance for risk communication and community engagement (RCCE) for refugees, internally displaced persons (IDPs), migrants and host communities particularly vulnerable to COVID-19 pandemic. London: British Red Cross; 2020 (<https://communityengagementhub.org/wp-content/uploads/sites/2/2020/06/Practical-Guidance-RCCE-Refugees-IDPs-Migrants.pdf>).
67. The Vaccine Confidence Project. Media Monitoring Report UK COVID-19 01 June to 31 July 2021. London: LSHTM <https://www.vaccineconfidence.org/research-feed/social-media-conversations-and-attitudes-in-the-uk-towards-covid-19>.
68. Vaccine misinformation management field guide: guidance for addressing a global infodemic and fostering demand for immunization. New York: United Nations Children's Fund; 2020 (<https://vaccinemisinformation.guide>).
69. Understanding the infodemic and misinformation in the fight against COVID-19: digital transformation toolkit. Washington (DC). Pan American Health Organization; 2020 ([https://iris.paho.org/bitstream/handle/10665.2/52052/Factsheet-infodemic\\_eng.pdf?sequence=16](https://iris.paho.org/bitstream/handle/10665.2/52052/Factsheet-infodemic_eng.pdf?sequence=16)).
70. How to address COVID-19 vaccine misinformation. Atlanta (GA): United States Centers for Disease Control and Prevention; 2021 (<https://www.cdc.gov/vaccines/covid-19/health-departments/addressing-vaccine-misinformation.html>).
71. Vandrevalla, Hendy, Hanson, Alidu & Ala (2022). Unpacking COVID-19 and Conspiracy Theories in the UK Black Community. Pre-print. .
72. Vandrevalla T, et al. "It's possibly made us feel a little more alienated": how people from ethnic minority communities conceptualise COVID-19 and its influence on engagement with testing. Jan 3, 2022 <https://doi.org/10.1177%2F13558196211054961>.

1  
2  
3  
4  
5  
6  
7  
8  
9  
10  
11  
12  
13  
14  
15  
16  
17  
18  
19  
20  
21  
22  
23  
24  
25  
26  
27  
28  
29  
30  
31  
32  
33  
34  
35  
36  
37  
38  
39  
40  
41  
42  
43  
44  
45  
46  
47  
48  
49  
50  
51  
52  
53  
54  
55  
56  
57  
58  
59  
60

For peer review only

1  
2  
3  
4  
5  
6  
7  
8  
9  
10  
11  
12  
13  
14  
15  
16  
17  
18  
19  
20  
21  
22  
23  
24  
25  
26  
27  
28  
29  
30  
31  
32  
33  
34  
35  
36  
37  
38  
39  
40  
41

**Identification**

**Screening**

**Eligibility**

**Included**

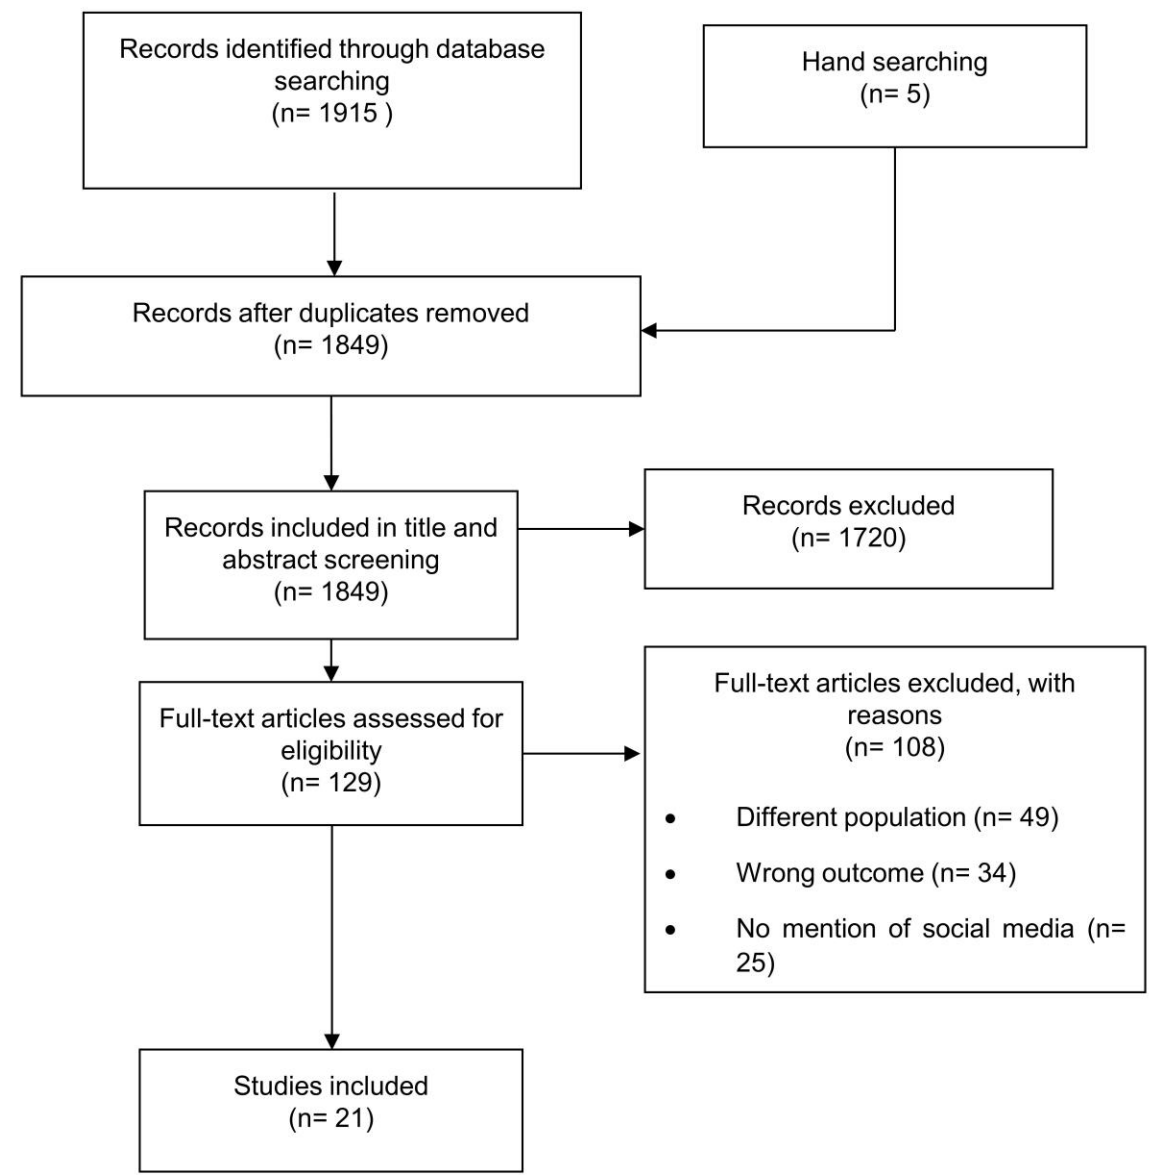



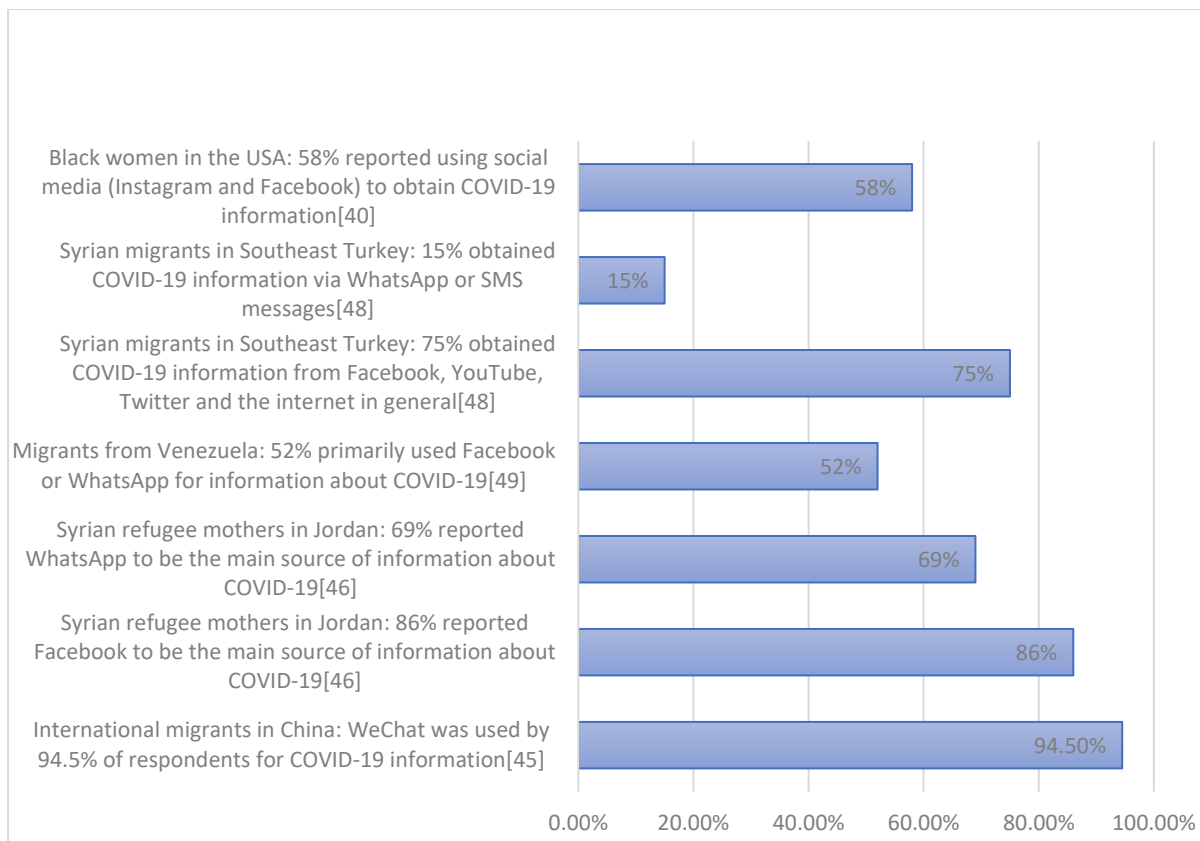

review only

## Supplementary file 1

### Online supplement 1: Search Strategy

We accessed the WHO COVID-19 Database using the following link:

<<https://search.bvsalud.org/global-literature-on-novel-coronavirus-2019-ncov/>>

We used the advanced search available at:

< <https://search.bvsalud.org/global-literature-on-novel-coronavirus-2019-ncov/advanced/?lang=en> >

We entered the following search terms into separate boxes linked by the 'AND' term. We specified that the following terms must appear in the title, abstract or subject.

|                               |                                                                                                                                                                                                                                                                                                                                                                                                                                                                                                                                                                                                                                                                                                                                                                                                                                                                                                 |
|-------------------------------|-------------------------------------------------------------------------------------------------------------------------------------------------------------------------------------------------------------------------------------------------------------------------------------------------------------------------------------------------------------------------------------------------------------------------------------------------------------------------------------------------------------------------------------------------------------------------------------------------------------------------------------------------------------------------------------------------------------------------------------------------------------------------------------------------------------------------------------------------------------------------------------------------|
| Migrant and ethnic minorities | Ancest* OR Diaspor* OR ethnic* OR Ethnoc* OR Ethnog* OR "Identity politics" OR Ingroups OR outgroups OR Intersectionality OR Kinship OR "Minority group*"~3 OR "minority population*"~2 OR minorities OR Multicultu* OR Polyethnic* OR "Population genetics" OR Race OR races OR racial OR Tribe* OR latino*) OR AB:(Ancest* OR Diaspor* OR ethnic* OR Ethnoc* OR Ethnog* OR "Identity politics" OR Ingroups OR Outgroups OR Intersectionality OR Kinship OR "Minority group*"~3 OR "minority population*"~2 OR minorities OR Multicultu* OR Polyethnic* OR "Population genetics" OR Race OR races OR racial OR Tribe* OR latino*) OR "afro american*"~3 OR BAME OR latino* OR roma OR romani OR refugee* OR immigrant* OR "migrant" OR "displaced person" OR "displaced persons" OR "social determinant*"~2 OR "latin population" OR "latin group*" OR "people of color" OR "people of colour" |
| AND                           | AND                                                                                                                                                                                                                                                                                                                                                                                                                                                                                                                                                                                                                                                                                                                                                                                                                                                                                             |
| Social media                  | social media OR social network OR online communit* OR online discuss* OR online communicat* OR online post OR messag* OR chat OR media OR misinformat* OR disinformat* OR malinformat* OR fake new* OR twitter OR whatsapp OR tweet OR post OR instagram OR reddit OR weibo OR sina OR youtube OR tiktok OR snapchat OR pinterest OR likee OR sharechat OR                                                                                                                                                                                                                                                                                                                                                                                                                                                                                                                                      |

|                                                                                                                                                                            |
|----------------------------------------------------------------------------------------------------------------------------------------------------------------------------|
| discord OR kuaishou OR wechat OR weixin OR qq OR telegram OR quora OR<br>mobile app OR blog OR podcast OR hashtag OR antivax* OR vaccine<br>hesitanc* OR web 2.0 OR online |
|----------------------------------------------------------------------------------------------------------------------------------------------------------------------------|

No additional filters or limits were used.

The WHO COVID-19 Database gathers the latest international multilingual scientific findings and knowledge on COVID-19. The global literature cited in the WHO COVID-19 database is updated daily (Monday through Friday) from searches of bibliographic databases, hand searching, and the addition of other expert-referred scientific articles. This database represents a comprehensive multilingual source of current literature on the topic.

The WHO COVID-19 Database draws literature from the following databases: Embase, Web of Science, Oxford Academic Journals, PubMed NIH, Clinical Trials, China CDC MMWR, CDC reports, ProQuest Central (Proquest), CINAHL, Africa Wide Information (Ebsco), Scopus, PsycInfo, CAB Abstracts, Global Health, J Stage, Science Direct, Wiley Online Journals, JAMA Network, British Medical Journal, Mary Ann Liebert, New England Journal of Medicine, Sage Publications, Taylor and Francis Online, Springer Link, Biomed Central, MDPI, ASM, PLOS, The Lancet, Cell Press, and pre-print sites chemRxiv, SSRNbioRxiv, and medRxiv.

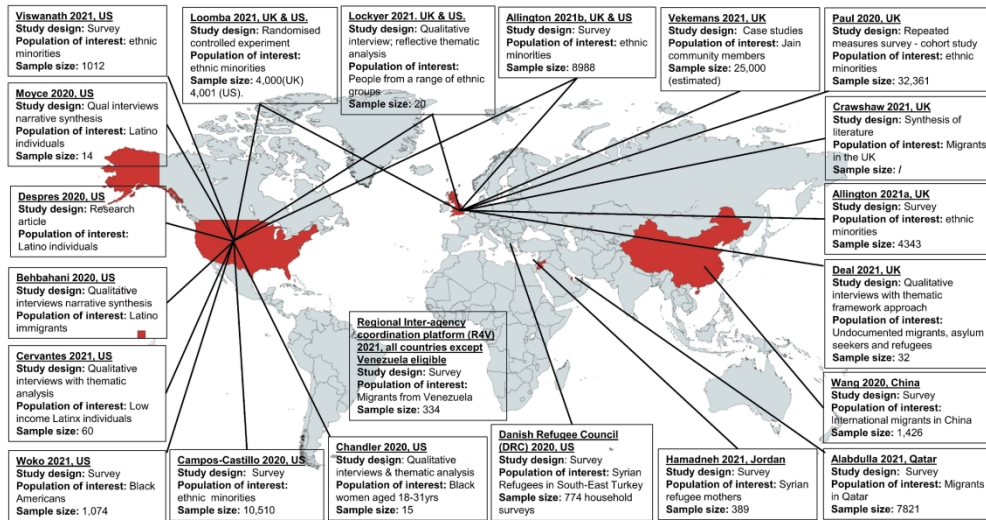

128x72mm (600 x 600 DPI)



## PRISMA 2020 Checklist

| Section and Topic             | Item # | Checklist item                                                                                                                                                                                                                                                                                       | Location where item is reported        |
|-------------------------------|--------|------------------------------------------------------------------------------------------------------------------------------------------------------------------------------------------------------------------------------------------------------------------------------------------------------|----------------------------------------|
| <b>TITLE</b>                  |        |                                                                                                                                                                                                                                                                                                      |                                        |
| Title                         | 1      | Identify the report as a systematic review.                                                                                                                                                                                                                                                          | P1 on bottom right hand side numbering |
| <b>ABSTRACT</b>               |        |                                                                                                                                                                                                                                                                                                      |                                        |
| Abstract                      | 2      | See the PRISMA 2020 for Abstracts checklist.                                                                                                                                                                                                                                                         | P2,3                                   |
| <b>INTRODUCTION</b>           |        |                                                                                                                                                                                                                                                                                                      |                                        |
| Rationale                     | 3      | Describe the rationale for the review in the context of existing knowledge.                                                                                                                                                                                                                          | P3-5                                   |
| Objectives                    | 4      | Provide an explicit statement of the objective(s) or question(s) the review addresses.                                                                                                                                                                                                               | P6                                     |
| <b>METHODS</b>                |        |                                                                                                                                                                                                                                                                                                      |                                        |
| Eligibility criteria          | 5      | Specify the inclusion and exclusion criteria for the review and how studies were grouped for the syntheses.                                                                                                                                                                                          | P6,P7                                  |
| Information sources           | 6      | Specify all databases, registers, websites, organisations, reference lists and other sources searched or consulted to identify studies. Specify the date when each source was last searched or consulted.                                                                                            | P6                                     |
| Search strategy               | 7      | Present the full search strategies for all databases, registers and websites, including any filters and limits used.                                                                                                                                                                                 | P6 and Supplementary File 1            |
| Selection process             | 8      | Specify the methods used to decide whether a study met the inclusion criteria of the review, including how many reviewers screened each record and each report retrieved, whether they worked independently, and if applicable, details of automation tools used in the process.                     | P6,7                                   |
| Data collection process       | 9      | Specify the methods used to collect data from reports, including how many reviewers collected data from each report, whether they worked independently, any processes for obtaining or confirming data from study investigators, and if applicable, details of automation tools used in the process. | P6,7                                   |
| Data items                    | 10a    | List and define all outcomes for which data were sought. Specify whether all results that were compatible with each outcome domain in each study were sought (e.g. for all measures, time points, analyses), and if not, the methods used to decide which results to collect.                        | P7                                     |
|                               | 10b    | List and define all other variables for which data were sought (e.g. participant and intervention characteristics, funding sources). Describe any assumptions made about any missing or unclear information.                                                                                         | P7,8                                   |
| Study risk of bias assessment | 11     | Specify the methods used to assess risk of bias in the included studies, including details of the tool(s) used, how many reviewers assessed each study and whether they worked independently, and if applicable, details of automation tools used in the process.                                    | P7,8                                   |
| Effect measures               | 12     | Specify for each outcome the effect measure(s) (e.g. risk ratio, mean difference) used in the synthesis or presentation of results.                                                                                                                                                                  | P7                                     |
| Synthesis methods             | 13a    | Describe the processes used to decide which studies were eligible for each synthesis (e.g. tabulating the study intervention characteristics and comparing against the planned groups for each synthesis (item #5)).                                                                                 | N/A                                    |
|                               | 13b    | Describe any methods required to prepare the data for presentation or synthesis, such as handling of missing summary statistics, or data conversions.                                                                                                                                                | N/A                                    |
|                               | 13c    | Describe any methods used to tabulate or visually display results of individual studies and syntheses.                                                                                                                                                                                               | N/A                                    |
|                               | 13d    | Describe any methods used to synthesize results and provide a rationale for the choice(s). If meta-analysis was performed, describe the model(s), method(s) to identify the presence and extent of statistical heterogeneity, and software package(s) used.                                          | P7                                     |
|                               | 13e    | Describe any methods used to explore possible causes of heterogeneity among study results (e.g. subgroup analysis, meta-regression).                                                                                                                                                                 | N/A – NOT DONE                         |



## PRISMA 2020 Checklist

| Section and Topic             | Item # | Checklist item                                                                                                                                                                                                                                                                       | Location where item is reported                 |
|-------------------------------|--------|--------------------------------------------------------------------------------------------------------------------------------------------------------------------------------------------------------------------------------------------------------------------------------------|-------------------------------------------------|
|                               |        |                                                                                                                                                                                                                                                                                      | FORMALLY.                                       |
|                               | 13f    | Describe any sensitivity analyses conducted to assess robustness of the synthesized results.                                                                                                                                                                                         | N/A – NOT DONE.                                 |
| Reporting bias assessment     | 14     | Describe any methods used to assess risk of bias due to missing results in a synthesis (arising from reporting biases).                                                                                                                                                              | N/A – NOT DONE , NOT SUITABLE FOR THIS STUDY    |
| Certainty assessment          | 15     | Describe any methods used to assess certainty (or confidence) in the body of evidence for an outcome.                                                                                                                                                                                | N/A – NOT DONE, NOT SUITABLE FOR THIS STUDY     |
| <b>RESULTS</b>                |        |                                                                                                                                                                                                                                                                                      |                                                 |
| Study selection               | 16a    | Describe the results of the search and selection process, from the number of records identified in the search to the number of studies included in the review, ideally using a flow diagram.                                                                                         | FIGURE 1 IS REFERRED TO ON PAGE 8               |
|                               | 16b    | Cite studies that might appear to meet the inclusion criteria, but which were excluded, and explain why they were excluded.                                                                                                                                                          | N/A – NOT DONE , NOT NEEDED HERE.               |
| Study characteristics         | 17     | Cite each included study and present its characteristics.                                                                                                                                                                                                                            | P8-9                                            |
| Risk of bias in studies       | 18     | Present assessments of risk of bias for each included study.                                                                                                                                                                                                                         | P9                                              |
| Results of individual studies | 19     | For all outcomes, present, for each study: (a) summary statistics for each group (where appropriate) and (b) an effect estimate and its precision (e.g. confidence/credible interval), ideally using structured tables or plots.                                                     | P10-P17; NOTE QUALITATIVE STUDIES ALSO INCLUDED |
| Results of syntheses          | 20a    | For each synthesis, briefly summarise the characteristics and risk of bias among contributing studies.                                                                                                                                                                               | P10-17                                          |
|                               | 20b    | Present results of all statistical syntheses conducted. If meta-analysis was done, present for each the summary estimate and its precision (e.g. confidence/credible interval) and measures of statistical heterogeneity. If comparing groups, describe the direction of the effect. | N/A – NOT QUANT SYNTHESIS                       |
|                               | 20c    | Present results of all investigations of possible causes of heterogeneity among study results.                                                                                                                                                                                       | N/A – NOT QUANT SYNTHESIS                       |
|                               | 20d    | Present results of all sensitivity analyses conducted to assess the robustness of the synthesized results.                                                                                                                                                                           | N/A – NOT QUANT                                 |



## PRISMA 2020 Checklist

| Section and Topic                              | Item # | Checklist item                                                                                                                                                                                                                             | Location where item is reported |
|------------------------------------------------|--------|--------------------------------------------------------------------------------------------------------------------------------------------------------------------------------------------------------------------------------------------|---------------------------------|
|                                                |        |                                                                                                                                                                                                                                            | SYNTHESIS                       |
| Reporting biases                               | 21     | Present assessments of risk of bias due to missing results (arising from reporting biases) for each synthesis assessed.                                                                                                                    | N/A – NOT QUANT SYNTHESIS       |
| Certainty of evidence                          | 22     | Present assessments of certainty (or confidence) in the body of evidence for each outcome assessed.                                                                                                                                        | N/A – NOT QUANT SYNTHESIS       |
| <b>DISCUSSION</b>                              |        |                                                                                                                                                                                                                                            |                                 |
| Discussion                                     | 23a    | Provide a general interpretation of the results in the context of other evidence.                                                                                                                                                          | P18-20                          |
|                                                | 23b    | Discuss any limitations of the evidence included in the review.                                                                                                                                                                            | P18                             |
|                                                | 23c    | Discuss any limitations of the review processes used.                                                                                                                                                                                      | P18-20                          |
|                                                | 23d    | Discuss implications of the results for practice, policy, and future research.                                                                                                                                                             | P18-23                          |
| <b>OTHER INFORMATION</b>                       |        |                                                                                                                                                                                                                                            |                                 |
| Registration and protocol                      | 24a    | Provide registration information for the review, including register name and registration number, or state that the review was not registered.                                                                                             | P3                              |
|                                                | 24b    | Indicate where the review protocol can be accessed, or state that a protocol was not prepared.                                                                                                                                             | P6                              |
|                                                | 24c    | Describe and explain any amendments to information provided at registration or in the protocol.                                                                                                                                            | N/A, NO AMENDMENTS              |
| Support                                        | 25     | Describe sources of financial or non-financial support for the review, and the role of the funders or sponsors in the review.                                                                                                              | P24                             |
| Competing interests                            | 26     | Declare any competing interests of review authors.                                                                                                                                                                                         | P25                             |
| Availability of data, code and other materials | 27     | Report which of the following are publicly available and where they can be found: template data collection forms; data extracted from included studies; data used for all analyses; analytic code; any other materials used in the review. | P23                             |

From: Page MJ, McKenzie JE, Bossuyt PM, Boutron I, Hoffmann TC, Mulrow CD, et al. The PRISMA 2020 statement: an updated guideline for reporting systematic reviews. *BMJ* 2021;372:n71. doi: 10.1136/bmj.n71  
 For more information, visit: <http://www.prisma-statement.org/>
